# Supplementary material for: Cancer burden and risk in the Chinese population aged 55 years and above: A systematic analysis and comparison with the USA and Western Europe
Source: PubMed Central journal article supplement (PMC10810324; doi:10.7189/jogh.14.04014), 2024-01-26
Supplement: jogh-14-04014-s001.pdf [file jogh-14-04014-s001.pdf]

## Legends of Online Supplementary Document

**Table S1** List of International Classification of Diseases (ICD) codes mapped to the Global Burden of Disease cause list for neoplasms

**Note:** ICD= International Classification of Diseases.

**Table S2** The incident cases and ASIR of 29 cancers among China, United States and Western Europe in 1990 and 2019, and the AAPC of ASIR from 1990 to 2019

**Note:** Estimates are for populations aged 55 years and above, both sexes combined. All malignant cancers are the sum of the following 29 cancers. Rates are reported per 100000 person-years. Cancer types are listed alphabetically. Other malignant neoplasms are cancers without a detailed GBD cause separately listed. UI=uncertainty interval. ASIR=age-standardized incidence rate. AAPC=average annual percentage change. CI = confidence interval. UI = uncertainty intervals.

**Table S3** The death cases and ASDR of 29 cancers among China, United States and Western Europe in 1990 and 2019, and the AAPC of ASDR from 1990 to 2019

**Note:** Estimates are for populations aged 55 years and above, both sexes combined. All malignant cancers are the sum of the following 29 cancers. Rates are reported per 100000 person-years. Cancer types are listed alphabetically. Other malignant neoplasms are cancers without a detailed GBD cause separately listed. UI=uncertainty interval. ASDR=age-standardized death rate. AAPC=average annual percentage change. CI = confidence interval. UI = uncertainty intervals.

**Table S4** The DALYs and DALY rate of 29 cancers among men and women over 55+ years old in China in 1990 and 2019, and percentage change in DALYs, annual rate of change in DALY rate from 1990 to 2019

**Note:** Estimates are for populations aged 55 years and above among men and women in China. Rates are reported per 100000 person-years. Cancer types are listed alphabetically. Other malignant neoplasms are cancers without a detailed GBD cause separately listed. DALYs=disability-adjusted life-years. UI=uncertainty interval.

**Table S5** The death cases and death rate of 29 cancers among men and women over 55+ years old in China in 1990 and 2019, and percentage change in death cases, annual rate of change in death rate from 1990 to 2019

**Note:** Estimates are for populations aged 55 years and above among men and women in China. Rates are reported per 100000 person-years. Cancer types are listed alphabetically. Other malignant neoplasms are cancers without a detailed GBD cause separately listed. UI=uncertainty interval.

**Table S6** The incident cases and incident rate of 29 cancers among men and women over 55+ years old in China in 1990 and 2019, and percentage change in incident cases, annual rate of change in incidence rate from 1990 to 2019

**Note:** Estimates are for populations aged 55 years and above among men and women in China. Rates are reported per 100000 person-years. Cancer types are listed alphabetically. Other malignant neoplasms are cancers without a detailed GBD cause separately listed. UI=uncertainty interval.

**Table S7** The DALYs and DALY rate in the risks for 20 cancers among men in 1990 and 2019, and percentage change in DALYs, annual rate of change in DALY rate from 1990 to 2019

**Note:** Estimates are for populations aged 55 years and above among men in China. Rates are reported per 100000 person-years. Cancer types and risks are listed alphabetically. DALY=disability-adjusted life-year, UI=uncertainty interval.

**Table S8** The DALYs and DALY rate in the risks for 22 cancers among women in 1990 and 2019, and percentage change in DALYs, annual rate of change in DALY rate from 1990 to 2019

**Note:** Estimates are for populations aged 55 years and above among women in China. Rates are reported per 100000 person-years. Cancer types and risks are listed alphabetically. DALY=disability-adjusted life-year, UI=uncertainty interval.

**Figure S1** The changing trend of incidence rate (A) and the rank of incident cases (B) for 29 cancers in China from 1990 to 2019

**Note:** Estimates are for populations aged 55 years and above, both sexes in China. Rates are reported per 100000 person-years.

**Figure S2** Incident cases, deaths and DALYs (A, B, C) of 29 cancers in 4 age groups (55–64 years, 65–74 years, 75–84 years, 85+ years) and the proportional incident cases, deaths, DALYs (D, E, F) in the four age groups in China in 2019

**Note:** Estimates are for populations aged 55 years and above, both sexes in China. DALY = disability-adjusted life-year.

**Figure S3** Incident cases, DALYs (A, B) and the proportional incident cases, DALYs (C, D) of 29 cancers among men and women in China in 2019

**Note:** Estimates are for populations aged 55 years and above among men and women in China. DALY=disability-adjusted life-year.

**Figure S4** Ratio of men to women incidence rate (A) and ratio of men to women DALY rate (B) of 24 cancers (the cancers can affect both men and women) in China from 1990 to 2019

**Note:** Estimates are for populations aged 55 years and above. DALY=disability-adjusted life-year.

**Figure S5** Incident cases (A), death cases (C), DALYs (E) and the proportional incident cases (B), proportional deaths (D), proportional DALYs (F) of 29 cancers among China, United States, Western Europe in 2019

**Note:** Estimates are for populations aged 55 years and above. DALY=disability-adjusted life-year.

**Figure S6** The change trend of ASIR in 29 cancers among China, United States, Western Europe from 1990 to 2019

**Note:** Estimates are for populations aged 55 years and above. Rates are reported per 100000 person-years. ASIR=age-standardized incidence rate.

**Figure S7** The change trend of ASDR in 29 cancers among China, United States, Western Europe from 1990 to 2019

**Note:** Estimates are for populations aged 55 years and above. Rates are reported per 100000 person-years. ASDR=age-standardized death rate.

**Table S1** List of International Classification of Diseases (ICD) codes mapped to the Global Burden of Disease cause list for neoplasms

| <b>Cancer type</b>                          | <b>ICD10</b>                                                     | <b>ICD9</b>                                                  |
|---------------------------------------------|------------------------------------------------------------------|--------------------------------------------------------------|
| <b>Lip and oral cavity cancer</b>           | C00-C07, C08-C08.9, Z85.81-Z85.810                               | 140-145.9, V76.42                                            |
| <b>Nasopharynx cancer</b>                   | C11-C11.9                                                        | 147-147.9                                                    |
| <b>Other pharynx cancer</b>                 | C09-C10.9, C12-C13.9                                             | 146-146.9, 148-148.9                                         |
| <b>Esophageal cancer</b>                    | C15-C15.9, Z85.01                                                | 150-150.9                                                    |
| <b>Stomach cancer</b>                       | C16-C16.9, Z12.0, Z85.02-Z85.028                                 | 151-151.9, 209.23, V10.04                                    |
| <b>Colon and rectum cancer</b>              | C18-C19.0, C20, C21-C21.8, Z12.1-Z12.13, Z85.03-Z85.048, Z86.010 | 153-154.9, 209.1-209.17, V10.05-V10.06, V76.41, V76.5-V76.52 |
| <b>Liver cancer</b>                         | C22-C22.4, C22.7-C22.9, Z85.05                                   | 155-155.9, V10.07                                            |
| <b>Gallbladder and biliary tract cancer</b> | C23, C24-C24.9                                                   | 156-156.9                                                    |
| <b>Pancreatic cancer</b>                    | C25-C25.9, Z85.07                                                | 157-157.9                                                    |
| <b>Larynx cancer</b>                        | C32-C32.9, Z85.21                                                | 161-161.9, V10.21                                            |
| <b>Tracheal, bronchus, and lung cancer</b>  | C33, C34-C34.92, Z12.2, Z80.1-Z80.2, Z85.1-Z85.20                | 162-162.9, 209.21, V10.1-V10.20, V16.1-V16.2, V16.4-V16.40   |
| <b>Malignant skin melanoma</b>              | C43-C43.9, Z85.82-Z85.828                                        | 172-172.9                                                    |
| <b>Non-melanoma skin cancer</b>             | C44.01-C44.99                                                    | 173-173.99                                                   |
| <b>Breast cancer</b>                        | C50-C50.629, C50.8-C50.929, Z12.3-Z12.39, Z80.3, Z85.3, Z86.000  | 174-175.9, V10.3, V16.3                                      |
| <b>Cervical cancer</b>                      | C53-C53.9, Z12.4, Z85.41                                         | 180-180.9, V10.41, V72.32                                    |
| <b>Uterine cancer</b>                       | C54-C54.3, C54.8-C54.9, Z85.42, Z86.001                          | 182-182.9                                                    |
| <b>Ovarian cancer</b>                       | C56-C56.2, C56.9, Z80.41, Z85.43                                 | 183-183.0, 183.8-183.9, V10.43, V16.41                       |
| <b>Prostate cancer</b>                      | C61-C61.9, Z12.5, Z80.42, Z85.46                                 | 185-185.9, V10.46, V16.42, V76.44                            |
| <b>Testicular cancer</b>                    | C62-C62.92, Z80.43, Z85.47-Z85.48                                | 186-186.9, V10.47-V10.48, V16.43                             |
| <b>Kidney cancer</b>                        | C64-C64.2, C64.9-C65.9, Z80.51, Z85.52-Z85.54                    | 189-189.1, 189.5-189.6, 209.24                               |

|                                                |                                                                                                                                |                                                                                                                                |
|------------------------------------------------|--------------------------------------------------------------------------------------------------------------------------------|--------------------------------------------------------------------------------------------------------------------------------|
| <b>Bladder cancer</b>                          | C67-C67.9, Z12.6-Z12.79, Z80.52, Z85.51                                                                                        | 188-188.9, V10.51, V16.52, V76.3                                                                                               |
| <b>Brain and central nervous system cancer</b> | C70-C70.1, C70.9-C72.9, Z85.841-Z85.848, Z86.011                                                                               | 191-191.9                                                                                                                      |
| <b>Thyroid cancer</b>                          | C73, Z85.850                                                                                                                   | 193-193.9                                                                                                                      |
| <b>Mesothelioma</b>                            | C45-C45.2, C45.7, C45.9                                                                                                        | /                                                                                                                              |
| <b>Hodgkin lymphoma</b>                        | C81-C81.49, C81.7-C81.79, C81.9-C81.99, Z85.71-Z85.72                                                                          | 201-201.98, V10.72                                                                                                             |
| <b>Non-Hodgkin lymphoma</b>                    | C82-C85.29, C85.7-C86.6, C96-C96.9                                                                                             | 200-200.9, 202-202.98                                                                                                          |
| <b>Multiple myeloma</b>                        | C88-C90.32                                                                                                                     | 203-203.9                                                                                                                      |
| <b>Leukemia</b>                                | C91-C93.7, C93.9-C95.2, C95.7-C95.92, Z80.6, Z85.6                                                                             | 204-208.92, V10.59-V10.69, V16.6                                                                                               |
| <b>Other malignant neoplasms</b>               | C75.90-C75.92, D00-D24.9, D26.0-D39.9, D4-D49.9, E34.0, K51.4-K51.419, K62.0-K62.3, K63.5, N60-N60.99, N84.0- N84.1, N87-N87.9 | 209.4-209.57, 209.61, 209.63-209.67, 210.0-217.8, 219-237.6, 237.70-237.72, 237.9-239.9, 569.0, 610- 610.9, 622.1-622.2, 622.7 |

**Note:** ICD= International Classification of Diseases.

**Table S2** The incident cases and ASIR of 29 cancers among China, United States and Western Europe in 1990 and 2019, and the AAPC of ASIR from 1990 to 2019

| Cause                                          | Incident cases*1000 in 1990 (95% UI) |                        |                        |
|------------------------------------------------|--------------------------------------|------------------------|------------------------|
|                                                | China                                | United States          | Western Europe         |
| <b>All malignant cancers</b>                   | 1086.7 (899.9-1275.9)                | 2018.9 (1740.8-2300.7) | 1508.8 (1390.6-1613.5) |
| <b>Bladder cancer</b>                          | 19.3 (16.9-22)                       | 24.3 (23.1-25)         | 80.6 (77.8-82.8)       |
| <b>Brain and central nervous system cancer</b> | 15.6 (12.8-20.9)                     | 9.5 (8.2-11.4)         | 17 (15-21.8)           |
| <b>Breast cancer</b>                           | 37.5 (31.5-44)                       | 131.8 (125.6-135.9)    | 154.7 (147.4-159.5)    |
| <b>Cervical cancer</b>                         | 18.3 (14.6-29.9)                     | 6.5 (5.9-6.8)          | 14.5 (13.3-15.3)       |
| <b>Colon and rectum cancer</b>                 | 72.5 (64.3-81.6)                     | 135.7 (129.3-139.5)    | 204.7 (196.2-209.8)    |
| <b>Esophageal cancer</b>                       | 143.5 (92.4-166.6)                   | 10.3 (9.9-10.6)        | 22.6 (21.9-23.1)       |
| <b>Gallbladder and biliary tract cancer</b>    | 9.7 (8-16.1)                         | 6.4 (5.3-6.8)          | 20.8 (16.4-22)         |
| <b>Hodgkin lymphoma</b>                        | 2.6 (1.4-3.4)                        | 2.5 (2-2.7)            | 3.8 (3.1-4.2)          |
| <b>Kidney cancer</b>                           | 5 (4.3-5.8)                          | 24.1 (23.2-24.9)       | 30.7 (29.5-31.6)       |
| <b>Larynx cancer</b>                           | 10.6 (9.1-12.2)                      | 9.8 (9.5-10)           | 20.6 (20-21.2)         |
| <b>Leukemia</b>                                | 18.5 (15.7-22.3)                     | 26 (24.5-26.9)         | 38.6 (36.7-39.8)       |
| <b>Lip and oral cavity cancer</b>              | 7.5 (6.7-8.5)                        | 16.7 (16.1-17.2)       | 24.1 (23.3-25)         |
| <b>Liver cancer</b>                            | 137.2 (115.9-165.4)                  | 5.6 (5.4-5.7)          | 17.8 (17.2-18.3)       |
| <b>Malignant skin melanoma</b>                 | 1.7 (1.3-2.5)                        | 19.5 (14.6-25.3)       | 19.2 (15.8-26.3)       |
| <b>Mesothelioma</b>                            | 0.7 (0.6-1)                          | 2.5 (2.3-2.7)          | 7 (6.4-7.7)            |
| <b>Multiple myeloma</b>                        | 4.6 (3.8-6.4)                        | 12.4 (10.5-12.9)       | 17.1 (15.7-19.4)       |
| <b>Nasopharynx cancer</b>                      | 15.1 (12.9-17.3)                     | 1.1 (1.1-1.2)          | 3.1 (2.9-3.2)          |
| <b>Non-Hodgkin lymphoma</b>                    | 8.5 (7.3-9.7)                        | 32.2 (29.8-34.6)       | 37.4 (34.7-40.2)       |
| <b>Non-melanoma skin cancer</b>                | 23.7 (19.2-29.2)                     | 1074.2 (895.2-1305.6)  | 200.2 (177.9-227)      |
| <b>Other malignant neoplasms</b>               | 26.6 (22.9-30.5)                     | 23.9 (22.2-25.7)       | 41.3 (35.8-43.5)       |
| <b>Other pharynx cancer</b>                    | 2.1 (1.8-2.4)                        | 5.2 (5-5.4)            | 7.6 (7.4-7.9)          |
| <b>Ovarian cancer</b>                          | 5.2 (4-8.2)                          | 15.1 (13.6-15.7)       | 27 (24.5-28)           |

|                                                |                                             |                        |                       |
|------------------------------------------------|---------------------------------------------|------------------------|-----------------------|
| <b>Pancreatic cancer</b>                       | 20 (17.4-22.4)                              | 26 (24.6-26.8)         | 44 (42.1-45.1)        |
| <b>Prostate cancer</b>                         | 24.9 (19-30)                                | 175.3 (120-193.7)      | 136.8 (103.5-166.3)   |
| <b>Stomach cancer</b>                          | 241 (211.8-272)                             | 23.6 (22.4-24.3)       | 83.7 (79.8-85.8)      |
| <b>Testicular cancer</b>                       | 0.4 (0.4-0.5)                               | 0.7 (0.6-0.8)          | 1.5 (1.1-1.8)         |
| <b>Thyroid cancer</b>                          | 3.8 (3.2-4.9)                               | 6.6 (6.3-6.9)          | 10.5 (9.8-11)         |
| <b>Tracheal, bronchus, and lung cancer</b>     | 197.7 (170.7-224.7)                         | 163.4 (157.8-166.9)    | 188.8 (183.7-191.9)   |
| <b>Uterine cancer</b>                          | 12.6 (9.9-15.4)                             | 27.9 (26.7-28.8)       | 33.2 (31.8-34.4)      |
|                                                | <b>Incident cases*1000 in 2019 (95% UI)</b> |                        |                       |
| <b>Cause</b>                                   | <b>China</b>                                | <b>United States</b>   | <b>Western Europe</b> |
| <b>All malignant cancers</b>                   | 3458.9 (2840.8-4127.2)                      | 5398.4 (4772.4-6138.4) | 2585.2 (2181-3072.2)  |
| <b>Bladder cancer</b>                          | 81.5 (68-96.7)                              | 45.7 (39.1-53.6)       | 128.9 (110.9-148.2)   |
| <b>Brain and central nervous system cancer</b> | 46.8 (34.8-56.5)                            | 18.8 (13.5-22.5)       | 32.2 (19.6-39.9)      |
| <b>Breast cancer</b>                           | 208.5 (168.1-257.1)                         | 193.5 (161.2-232)      | 248.6 (214.9-283.2)   |
| <b>Cervical cancer</b>                         | 48.2 (26.7-61.1)                            | 9.7 (7.7-11.8)         | 15 (12.6-17.3)        |
| <b>Colon and rectum cancer</b>                 | 464.3 (399.9-538.6)                         | 196.3 (170.6-225.6)    | 348.1 (302.3-393)     |
| <b>Esophageal cancer</b>                       | 242.5 (183.2-288.5)                         | 20.8 (17.7-24.5)       | 36 (31.4-40.8)        |
| <b>Gallbladder and biliary tract cancer</b>    | 33.2 (23.4-39.8)                            | 8.8 (7.4-10.7)         | 22.1 (18.1-25.9)      |
| <b>Hodgkin lymphoma</b>                        | 4.4 (3.1-5.3)                               | 4.1 (3.4-5.2)          | 6.1 (5.1-7.3)         |
| <b>Kidney cancer</b>                           | 35.2 (29.4-41.8)                            | 50.6 (43.2-58.7)       | 63.5 (55.9-71.5)      |
| <b>Larynx cancer</b>                           | 37.1 (30.2-44.9)                            | 14.4 (12-17.2)         | 20.9 (18-24.2)        |
| <b>Leukemia</b>                                | 62.6 (51.3-73.7)                            | 45.4 (38.7-53)         | 88.9 (77-101.4)       |
| <b>Lip and oral cavity cancer</b>              | 33.6 (28.1-39.9)                            | 25.8 (22.2-30.1)       | 32.8 (28.3-37.7)      |
| <b>Liver cancer</b>                            | 139.8 (117.3-165)                           | 24.1 (19.7-29)         | 41 (35.7-47.1)        |
| <b>Malignant skin melanoma</b>                 | 8.9 (5.6-11.3)                              | 58.6 (40-74.3)         | 65.7 (39.2-78.4)      |
| <b>Mesothelioma</b>                            | 1.8 (1.5-2.2)                               | 3.6 (3-4.2)            | 11.4 (9.9-12.8)       |
| <b>Multiple myeloma</b>                        | 14.7 (10.9-18.3)                            | 25 (21.2-30.3)         | 36.2 (29.1-41.4)      |

|                                                |                              |                      |                        |
|------------------------------------------------|------------------------------|----------------------|------------------------|
| <b>Nasopharynx cancer</b>                      | 47.4 (38.8-57.2)             | 1.8 (1.5-2.1)        | 5.3 (4.5-6.1)          |
| <b>Non-Hodgkin lymphoma</b>                    | 61.6 (51.3-73.1)             | 54.2 (46.4-63)       | 78.7 (66.4-90.8)       |
| <b>Non-melanoma skin cancer</b>                | 212.7 (178.8-251.9)          | 3813 (3455.5-4179.2) | 332.7 (276.1-404)      |
| <b>Other malignant neoplasms</b>               | 126 (101.7-150.4)            | 52.7 (44.7-61.2)     | 78.1 (64.8-90)         |
| <b>Other pharynx cancer</b>                    | 7.1 (5.9-8.5)                | 11.2 (9.3-13.4)      | 18.4 (15.7-21.5)       |
| <b>Ovarian cancer</b>                          | 25.9 (17.7-32.5)             | 21.1 (17.1-25.7)     | 32.9 (27.9-38.1)       |
| <b>Pancreatic cancer</b>                       | 94.6 (80.9-109.3)            | 53.9 (46.4-61.9)     | 86.3 (74.5-97.8)       |
| <b>Prostate cancer</b>                         | 145.5 (112.5-193.1)          | 293.6 (228.9-439.5)  | 314.7 (258.6-455)      |
| <b>Stomach cancer</b>                          | 496.4 (418-586)              | 28.1 (24.2-32.5)     | 78.2 (67.8-88)         |
| <b>Testicular cancer</b>                       | 3.9 (2.9-4.9)                | 1.5 (1.1-2)          | 2.3 (1.8-2.9)          |
| <b>Thyroid cancer</b>                          | 17.6 (14.6-21)               | 17.2 (14.6-19.9)     | 16.1 (14-18.4)         |
| <b>Tracheal, bronchus, and lung cancer</b>     | 721.9 (608.6-847.3)          | 238 (206.9-274.7)    | 274.6 (240.9-310.3)    |
| <b>Uterine cancer</b>                          | 35.3 (27.4-51.3)             | 67.2 (55.4-80.7)     | 69.5 (60-79.2)         |
| <b>Cause</b>                                   | <b>ASIR in 1990 (95% UI)</b> |                      |                        |
|                                                | <b>China</b>                 | <b>United States</b> | <b>Western Europe</b>  |
| <b>All malignant cancers</b>                   | 802.9 (658.7-953.8)          | 3606.2 (2965.6-4261) | 1490.6 (1342.9-1631.6) |
| <b>Bladder cancer</b>                          | 16.2 (13.9-18.6)             | 43.1 (40.6-45)       | 78.8 (74.5-82.6)       |
| <b>Brain and central nervous system cancer</b> | 11 (8.8-15.1)                | 17.5 (14.7-21.1)     | 17.3 (14.8-22)         |
| <b>Breast cancer</b>                           | 26.2 (21.9-31)               | 242.8 (226.9-255.8)  | 155.9 (145.5-165)      |
| <b>Cervical cancer</b>                         | 13 (10.2-21.3)               | 12.3 (10.7-13.2)     | 14.8 (13.2-16.1)       |
| <b>Colon and rectum cancer</b>                 | 55.9 (49.2-63.5)             | 240.6 (227.2-250.2)  | 199.6 (188.5-208)      |
| <b>Esophageal cancer</b>                       | 106 (68.4-124.4)             | 18.8 (17.9-19.6)     | 22.6 (21.6-23.5)       |
| <b>Gallbladder and biliary tract cancer</b>    | 7.8 (6.4-12.8)               | 11.2 (9.2-12.3)      | 20.1 (15.6-22)         |
| <b>Hodgkin lymphoma</b>                        | 1.9 (1-2.5)                  | 4.6 (3.6-5.2)        | 3.8 (3-4.3)            |
| <b>Kidney cancer</b>                           | 3.7 (3.1-4.3)                | 44.4 (42.1-46.5)     | 30.6 (28.6-32.7)       |
| <b>Larynx cancer</b>                           | 7.7 (6.5-8.9)                | 18.3 (17.4-19.2)     | 21.2 (20-22.5)         |

|                                                |                              |                        |                        |
|------------------------------------------------|------------------------------|------------------------|------------------------|
| <b>Leukemia</b>                                | 13.3 (11.1-16.5)             | 46.3 (43-48.6)         | 38.2 (35.5-40.4)       |
| <b>Lip and oral cavity cancer</b>              | 5.7 (4.9-6.5)                | 30.8 (29.1-32.4)       | 24.7 (22.9-26.5)       |
| <b>Liver cancer</b>                            | 96.9 (81-117.1)              | 10.1 (9.5-10.5)        | 17.6 (16.6-18.5)       |
| <b>Malignant skin melanoma</b>                 | 1.4 (1-2)                    | 36.2 (26.3-46.6)       | 19.3 (15.4-26.9)       |
| <b>Mesothelioma</b>                            | 0.5 (0.4-0.8)                | 4.4 (4-4.8)            | 6.9 (6.1-7.8)          |
| <b>Multiple myeloma</b>                        | 3.3 (2.6-4.7)                | 22.1 (18.1-23.7)       | 16.8 (14.9-19.1)       |
| <b>Nasopharynx cancer</b>                      | 10.6 (8.9-12.5)              | 2.2 (2-2.3)            | 3.2 (2.9-3.6)          |
| <b>Non-Hodgkin lymphoma</b>                    | 6.3 (5.4-7.4)                | 57.1 (51.2-62.9)       | 36.7 (33-40.4)         |
| <b>Non-melanoma skin cancer</b>                | 19.4 (15-25.1)               | 1903.2 (1463.7-2438)   | 197 (166.5-234.6)      |
| <b>Other malignant neoplasms</b>               | 20 (17-23.7)                 | 43.1 (39-47.1)         | 41.1 (34.6-44.7)       |
| <b>Other pharynx cancer</b>                    | 1.6 (1.3-1.8)                | 10 (9.4-10.6)          | 8 (7.5-8.5)            |
| <b>Ovarian cancer</b>                          | 3.8 (2.9-5.9)                | 27.6 (24.7-29.1)       | 27.1 (24.1-28.7)       |
| <b>Pancreatic cancer</b>                       | 14.9 (12.9-16.9)             | 46.2 (43.5-48.1)       | 43 (40.7-44.7)         |
| <b>Prostate cancer</b>                         | 20.8 (15.6-26.4)             | 309.3 (206.9-350)      | 131.4 (97.3-160.9)     |
| <b>Stomach cancer</b>                          | 178.7 (155.5-203.6)          | 41.5 (38.9-43.3)       | 81.2 (76.6-84.5)       |
| <b>Testicular cancer</b>                       | 0.3 (0.3-0.4)                | 1.4 (1.1-1.7)          | 1.6 (1.1-2.1)          |
| <b>Thyroid cancer</b>                          | 2.8 (2.3-3.6)                | 12.6 (11.6-13.6)       | 10.7 (9.7-11.8)        |
| <b>Tracheal, bronchus, and lung cancer</b>     | 144.5 (124.4-165.4)          | 297 (285.4-305.3)      | 187.9 (181.6-193.1)    |
| <b>Uterine cancer</b>                          | 8.7 (6.6-11)                 | 51.4 (47.9-54.3)       | 33.5 (31-36)           |
|                                                | <b>ASIR in 2019 (95% UI)</b> |                        |                        |
| <b>Cause</b>                                   | <b>China</b>                 | <b>United States</b>   | <b>Western Europe</b>  |
| <b>All malignant cancers</b>                   | 1022.3 (825.1-1230.8)        | 5432.8 (4625.8-6376.3) | 1631.2 (1328.8-1995.6) |
| <b>Bladder cancer</b>                          | 24.9 (20.5-29.7)             | 45.7 (38-54.1)         | 78.4 (65.6-91.9)       |
| <b>Brain and central nervous system cancer</b> | 13.8 (10-16.9)               | 19.1 (13.5-23.5)       | 21.4 (13-27)           |
| <b>Breast cancer</b>                           | 59 (47.1-73)                 | 197.9 (161.5-240.2)    | 163.7 (138.1-191.2)    |
| <b>Cervical cancer</b>                         | 13.7 (7.6-17.5)              | 10.1 (7.8-12.4)        | 10 (8.1-12)            |



|                                             |                     |                        |                     |
|---------------------------------------------|---------------------|------------------------|---------------------|
| <b>Colon and rectum cancer</b>              | 137.8 (116.8-160.5) | 198 (167.7-230)        | 213.7 (182.2-245.4) |
| <b>Esophageal cancer</b>                    | 72.5 (53.5-87.1)    | 21.2 (17.6-25.3)       | 23.1 (19.6-26.9)    |
| <b>Gallbladder and biliary tract cancer</b> | 10.3 (7.2-12.4)     | 8.8 (7.3-10.9)         | 12.9 (10.4-15.5)    |
| <b>Hodgkin lymphoma</b>                     | 1.3 (0.9-1.7)       | 4.1 (3.2-5.4)          | 3.9 (3.1-5)         |
| <b>Kidney cancer</b>                        | 10.3 (8.5-12.3)     | 51.7 (43.3-61)         | 40.9 (34.6-47.8)    |
| <b>Larynx cancer</b>                        | 10.7 (8.6-13)       | 14.8 (12.2-18)         | 14.4 (12.1-17.2)    |
| <b>Leukemia</b>                             | 18 (14.4-21.6)      | 45 (37.5-53.1)         | 54.4 (45.3-64)      |
| <b>Lip and oral cavity cancer</b>           | 9.8 (8.1-11.8)      | 26.4 (22.1-31.1)       | 22.1 (18.4-25.9)    |
| <b>Liver cancer</b>                         | 40.7 (33.7-48.3)    | 24.8 (20-30.1)         | 26 (22-30.3)        |
| <b>Malignant skin melanoma</b>              | 2.7 (1.6-3.5)       | 59.7 (40.3-78.2)       | 43 (25.6-52.9)      |
| <b>Mesothelioma</b>                         | 0.5 (0.4-0.7)       | 3.6 (3-4.3)            | 7.1 (6-8.3)         |
| <b>Multiple myeloma</b>                     | 4.3 (3.1-5.4)       | 25.2 (20.6-31.6)       | 22.1 (17.3-26.3)    |
| <b>Nasopharynx cancer</b>                   | 13.5 (10.7-16.8)    | 1.8 (1.5-2.2)          | 3.7 (2.9-4.5)       |
| <b>Non-Hodgkin lymphoma</b>                 | 18.1 (14.9-21.9)    | 53.8 (44.5-64)         | 46.8 (38.7-55.1)    |
| <b>Non-melanoma skin cancer</b>             | 62.6 (49.1-78.1)    | 3824.3 (3320.4-4363.6) | 203.9 (155-267.3)   |
| <b>Other malignant neoplasms</b>            | 37.6 (29.7-45.2)    | 53 (44-62.3)           | 48 (39-56.8)        |
| <b>Other pharynx cancer</b>                 | 2.1 (1.7-2.5)       | 11.7 (9.5-14.1)        | 13.3 (10.9-16.1)    |
| <b>Ovarian cancer</b>                       | 7.4 (5-9.4)         | 21.5 (17-26.5)         | 21.2 (17.6-25.3)    |
| <b>Pancreatic cancer</b>                    | 28.3 (23.9-33)      | 54.2 (45.8-62.9)       | 52.4 (44.2-60.4)    |
| <b>Prostate cancer</b>                      | 43.7 (33.1-59.2)    | 298.5 (226.3-451.6)    | 200.4 (157.1-294.7) |
| <b>Stomach cancer</b>                       | 147.2 (122.5-174.4) | 28.1 (23.7-32.9)       | 46.8 (39.7-53.7)    |
| <b>Testicular cancer</b>                    | 1.1 (0.8-1.5)       | 1.7 (1.1-2.2)          | 1.7 (1.2-2.3)       |
| <b>Thyroid cancer</b>                       | 5.1 (4.1-6.1)       | 17.9 (14.9-21.1)       | 11.3 (9.5-13.2)     |
| <b>Tracheal, bronchus, and lung cancer</b>  | 215.5 (179.9-253.2) | 240.9 (205.4-279)      | 177.4 (152.2-203.2) |
| <b>Uterine cancer</b>                       | 9.9 (7.5-14.2)      | 69.4 (56.2-84.6)       | 47.1 (39.4-55.3)    |
| <b>Cause</b>                                |                     | <b>AAPC (95% CI)</b>   |                     |

|                                                | <b>China</b>           | <b>United States</b>   | <b>Western Europe</b>  |
|------------------------------------------------|------------------------|------------------------|------------------------|
| <b>All malignant cancers</b>                   | 0.81 (0.65 to 0.98)    | 1.39 (1.3 to 1.48)     | 0.38 (0.3 to 0.47)     |
| <b>Bladder cancer</b>                          | 1.42 (1.19 to 1.66)    | 0.17 (-0.01 to 0.35)   | -0.02 (-0.12 to 0.08)  |
| <b>Brain and central nervous system cancer</b> | 0.78 (0.59 to 0.97)    | 0.29 (0.16 to 0.42)    | 0.73 (0.57 to 0.89)    |
| <b>Breast cancer</b>                           | 2.72 (2.12 to 3.31)    | -0.77 (-0.94 to -0.59) | 0.16 (0.03 to 0.28)    |
| <b>Cervical cancer</b>                         | 0.16 (-0.23 to 0.54)   | -0.71 (-0.99 to -0.44) | -1.28 (-1.45 to -1.1)  |
| <b>Colon and rectum cancer</b>                 | 3.13 (2.86 to 3.4)     | -0.67 (-0.95 to -0.38) | 0.19 (0.01 to 0.36)    |
| <b>Esophageal cancer</b>                       | -1.34 (-1.56 to -1.12) | 0.32 (0.26 to 0.38)    | 0.06 (0.01 to 0.12)    |
| <b>Gallbladder and biliary tract cancer</b>    | 0.93 (0.78 to 1.08)    | -0.87 (-1.06 to -0.68) | -1.52 (-1.62 to -1.41) |
| <b>Hodgkin lymphoma</b>                        | -1.24 (-1.53 to -0.94) | -0.33 (-0.51 to -0.16) | 0.09 (-0.01 to 0.19)   |
| <b>Kidney cancer</b>                           | 3.55 (3.33 to 3.78)    | 0.45 (0.19 to 0.71)    | 1.01 (0.89 to 1.13)    |
| <b>Larynx cancer</b>                           | 1.13 (0.95 to 1.3)     | -0.71 (-0.94 to -0.48) | -1.31 (-1.43 to -1.19) |
| <b>Leukemia</b>                                | 1.02 (0.79 to 1.26)    | -0.11 (-0.36 to 0.15)  | 1.23 (1.1 to 1.36)     |
| <b>Lip and oral cavity cancer</b>              | 1.84 (1.68 to 2.01)    | -0.48 (-0.6 to -0.36)  | -0.39 (-0.54 to -0.23) |
| <b>Liver cancer</b>                            | -3 (-3.21 to -2.79)    | 3.14 (3.11 to 3.18)    | 1.36 (1.3 to 1.42)     |
| <b>Malignant skin melanoma</b>                 | 2.35 (2.1 to 2.61)     | 1.78 (1.53 to 2.03)    | 2.79 (2.61 to 2.96)    |
| <b>Mesothelioma</b>                            | -0.01 (-0.22 to 0.2)   | -0.7 (-0.86 to -0.55)  | 0.13 (0 to 0.26)       |
| <b>Multiple myeloma</b>                        | 0.85 (0.68 to 1.02)    | 0.45 (0.35 to 0.56)    | 0.96 (0.84 to 1.08)    |
| <b>Nasopharynx cancer</b>                      | 0.74 (0.52 to 0.97)    | -0.63 (-0.76 to -0.5)  | 0.48 (0.38 to 0.58)    |
| <b>Non-Hodgkin lymphoma</b>                    | 3.67 (3.28 to 4.07)    | -0.21 (-0.37 to -0.06) | 0.87 (0.73 to 1.01)    |
| <b>Non-melanoma skin cancer</b>                | 4.15 (3.92 to 4.38)    | 2.39 (2.26 to 2.52)    | 0.18 (0.09 to 0.26)    |
| <b>Other malignant neoplasms</b>               | 2.17 (2.04 to 2.31)    | 0.74 (0.63 to 0.84)    | 0.54 (0.44 to 0.65)    |
| <b>Other pharynx cancer</b>                    | 0.97 (0.82 to 1.12)    | 0.64 (0.3 to 0.98)     | 1.78 (1.48 to 2.07)    |
| <b>Ovarian cancer</b>                          | 2.31 (2.09 to 2.53)    | -0.85 (-1.1 to -0.59)  | -0.96 (-1.04 to -0.88) |
| <b>Pancreatic cancer</b>                       | 2.22 (1.95 to 2.49)    | 0.57 (0.28 to 0.86)    | 0.7 (0.56 to 0.84)     |
| <b>Prostate cancer</b>                         | 2.58 (2.35 to 2.8)     | -0.11 (-0.22 to 0.01)  | 1.46 (1.34 to 1.59)    |

|                                            |                       |                       |                       |
|--------------------------------------------|-----------------------|-----------------------|-----------------------|
| <b>Stomach cancer</b>                      | -0.69 (-0.9 to -0.48) | -1.34 (-1.6 to -1.08) | -1.9 (-2.06 to -1.73) |
| <b>Testicular cancer</b>                   | 4.25 (3.78 to 4.73)   | 0.54 (0.37 to 0.71)   | 0.26 (0.01 to 0.5)    |
| <b>Thyroid cancer</b>                      | 2.04 (1.72 to 2.36)   | 1.23 (0.89 to 1.58)   | 0.15 (0.01 to 0.28)   |
| <b>Tracheal, bronchus, and lung cancer</b> | 1.33 (1.07 to 1.6)    | -0.69 (-1.1 to -0.27) | -0.16 (-0.35 to 0.04) |
| <b>Uterine cancer</b>                      | 0.38 (0.02 to 0.75)   | 0.97 (0.58 to 1.37)   | 1.17 (0.92 to 1.42)   |

**Note:** Estimates are for populations aged 55 years and above, both sexes combined. All malignant cancers are the sum of the following 29 cancers. Rates are reported per 100000 person-years. Cancer types are listed alphabetically. Other malignant neoplasms are cancers without a detailed GBD cause separately listed. UI=uncertainty interval. ASIR=age-standardized incidence rate. AAPC=average annual percentage change. CI = confidence interval. UI = uncertainty intervals.

**Table S3** The death cases and ASDR of 29 cancers among China, United States and Western Europe in 1990 and 2019, and the AAPC of ASDR from 1990 to 2019

| Cause                                          | Deaths*100 in 1990 (95% UI) |                        |                        |
|------------------------------------------------|-----------------------------|------------------------|------------------------|
|                                                | China                       | United States          | Western Europe         |
| <b>All malignant neoplasms</b>                 | 10255.9 (8495.6-12019.9)    | 4642.4 (4277.9-4849.5) | 8532.2 (7949.3-8951.6) |
| <b>Bladder cancer</b>                          | 148.2 (129.7-167)           | 116.3 (108.9-120.8)    | 355.2 (338.4-365.5)    |
| <b>Brain and central nervous system cancer</b> | 158.6 (129.5-212)           | 85.5 (73.7-103.1)      | 142.8 (127.3-185.7)    |
| <b>Breast cancer</b>                           | 236.3 (198.7-277.3)         | 375.5 (352.2-387.8)    | 710.6 (667.9-731.8)    |
| <b>Cervical cancer</b>                         | 163 (129.5-259.2)           | 39.8 (35.9-41.9)       | 98.4 (89.8-102.8)      |
| <b>Colon and rectum cancer</b>                 | 583 (514.6-653.1)           | 600.2 (563.5-620.7)    | 1212.7 (1148.3-1247.8) |
| <b>Esophageal cancer</b>                       | 1494.3 (948.6-1736.8)       | 99.7 (95.9-102.7)      | 223.8 (215.7-228.7)    |
| <b>Gallbladder and biliary tract cancer</b>    | 98.1 (80.9-161.9)           | 41.3 (33.9-43.7)       | 165.8 (130.3-174.6)    |
| <b>Hodgkin lymphoma</b>                        | 24.9 (13.2-32)              | 9.2 (7.5-10.2)         | 20.8 (16.9-23.1)       |
| <b>Kidney cancer</b>                           | 37.1 (32.1-42.6)            | 98.3 (93.7-101.8)      | 177.1 (169.3-182.4)    |
| <b>Larynx cancer</b>                           | 90.4 (77.5-103.3)           | 36.5 (35.2-37.4)       | 109.6 (106.4-112.3)    |
| <b>Leukemia</b>                                | 170.4 (146.2-204.4)         | 169.8 (159.7-175.7)    | 250.4 (237.4-257.3)    |
| <b>Lip and oral cavity cancer</b>              | 51.5 (45.1-57.8)            | 50.7 (48.3-52.1)       | 97.3 (93.3-99.7)       |
| <b>Liver cancer</b>                            | 1417.3 (1212.5-1698.7)      | 55.3 (52.7-56.8)       | 180.9 (173.6-186)      |
| <b>Malignant skin melanoma</b>                 | 15.4 (11.2-23.1)            | 49 (36.8-64.3)         | 65.4 (54.7-91.7)       |
| <b>Mesothelioma</b>                            | 7.1 (5.5-10)                | 20.7 (19.3-22.2)       | 58.2 (53-64.4)         |
| <b>Multiple myeloma</b>                        | 42.2 (34.5-58.4)            | 94.8 (80.2-98.8)       | 126.7 (116.9-144.1)    |
| <b>Nasopharynx cancer</b>                      | 146.9 (126.6-168.6)         | 7.1 (6.8-7.3)          | 17.1 (16.5-17.7)       |
| <b>Non-Hodgkin lymphoma</b>                    | 88.6 (77.6-100)             | 181.2 (171.2-186.6)    | 214.3 (204.7-220.4)    |
| <b>Non-melanoma skin cancer</b>                | 39.3 (34.4-44.1)            | 20.4 (18.9-21.1)       | 33.3 (30.1-34.7)       |
| <b>Other malignant neoplasms</b>               | 234.8 (204.2-271.2)         | 97.2 (88.6-105.4)      | 254 (225.5-265.3)      |
| <b>Other pharynx cancer</b>                    | 20.5 (17.7-23.4)            | 16.5 (15.9-17.1)       | 48.5 (47-50.1)         |
| <b>Ovarian cancer</b>                          | 46.9 (35.8-73.6)            | 122.9 (109.9-128.3)    | 224.9 (204-233.5)      |

|                                                |                                    |                      |                           |
|------------------------------------------------|------------------------------------|----------------------|---------------------------|
| <b>Pancreatic cancer</b>                       | 209.1 (183.3-236.3)                | 261.5 (246.6-269.7)  | 452 (430.6-463.2)         |
| <b>Prostate cancer</b>                         | 196.3 (152.8-238.5)                | 358.2 (253.8-401.3)  | 621.4 (475.3-743.6)       |
| <b>Stomach cancer</b>                          | 2410.9 (2111.8-2722.1)             | 170.3 (160.4-175.4)  | 738.3 (702.7-757.6)       |
| <b>Testicular cancer</b>                       | 2.2 (1.8-2.6)                      | 1 (1-1.1)            | 3.3 (3.1-3.4)             |
| <b>Thyroid cancer</b>                          | 22.9 (19.8-30.1)                   | 11 (10.1-11.4)       | 35.2 (32.6-36.5)          |
| <b>Tracheal, bronchus, and lung cancer</b>     | 2028.8 (1764.5-2324.3)             | 1400 (1348.2-1429.9) | 1808.5 (1757.8-1838.7)    |
| <b>Uterine cancer</b>                          | 70.9 (56-87.3)                     | 52.6 (49.1-54.5)     | 85.5 (80.1-88.8)          |
|                                                | <b>Deaths*100 in 2019 (95% UI)</b> |                      |                           |
| <b>Cause</b>                                   | <b>China</b>                       | <b>United States</b> | <b>Western Europe</b>     |
| <b>All malignant neoplasms</b>                 | 22435.1 (18497.8-26498.8)          | 6967.4 (6336.1-7569) | 11762.7 (10400.9-12815.6) |
| <b>Bladder cancer</b>                          | 369.8 (313.9-433.7)                | 220.8 (200.2-236)    | 493.5 (440.3-532.4)       |
| <b>Brain and central nervous system cancer</b> | 416.4 (306.6-504.7)                | 159.9 (116.7-174)    | 239.4 (144.3-272.8)       |
| <b>Breast cancer</b>                           | 678 (549.5-824.5)                  | 467.3 (428.5-494.7)  | 857 (757.9-914)           |
| <b>Cervical cancer</b>                         | 350.1 (205.4-446.1)                | 58.3 (48.4-62.3)     | 94.3 (80.8-102.7)         |
| <b>Colon and rectum cancer</b>                 | 2174.3 (1868.1-2512.2)             | 761.2 (701.4-795.4)  | 1636.4 (1468-1729.6)      |
| <b>Esophageal cancer</b>                       | 2296.9 (1770.8-2749.5)             | 197.5 (186.8-206.1)  | 320 (296.7-337)           |
| <b>Gallbladder and biliary tract cancer</b>    | 302.8 (220.7-361.3)                | 49.9 (44.7-60.2)     | 163 (135.1-182)           |
| <b>Hodgkin lymphoma</b>                        | 18.9 (13.6-22.9)                   | 10.9 (9.5-13.4)      | 18.3 (15.3-21.8)          |
| <b>Kidney cancer</b>                           | 186.5 (155-219.8)                  | 180.4 (167.1-190.2)  | 320.3 (291.5-339.5)       |
| <b>Larynx cancer</b>                           | 175.2 (145.8-209)                  | 45.2 (42.8-47.2)     | 87.6 (81.5-92.2)          |
| <b>Leukemia</b>                                | 340 (281.6-400.8)                  | 279.4 (255.5-294.8)  | 409.7 (359.5-436.1)       |
| <b>Lip and oral cavity cancer</b>              | 183.3 (154.2-218.8)                | 70.2 (65.8-73.2)     | 125.9 (115.6-132.2)       |
| <b>Liver cancer</b>                            | 1327.2 (1123.9-1565.1)             | 214.5 (190.5-235.1)  | 374.7 (345.3-399.4)       |
| <b>Malignant skin melanoma</b>                 | 36.1 (23.3-45.2)                   | 100.1 (67.6-119.8)   | 132.6 (77.7-148.8)        |
| <b>Mesothelioma</b>                            | 19.1 (15.8-22.8)                   | 30.8 (28.4-33)       | 98.4 (90.1-104)           |
| <b>Multiple myeloma</b>                        | 110.7 (84.4-135.3)                 | 170.2 (152.6-194)    | 249.5 (202.7-268.4)       |

|                                                |                              |                      |                        |
|------------------------------------------------|------------------------------|----------------------|------------------------|
| <b>Nasopharynx cancer</b>                      | 191.1 (159.4-225.9)          | 8.8 (8.3-9.2)        | 15.6 (14.5-16.6)       |
| <b>Non-Hodgkin lymphoma</b>                    | 325.2 (276.2-379.5)          | 276.4 (254.2-291.9)  | 353.2 (316.2-376.8)    |
| <b>Non-melanoma skin cancer</b>                | 136.9 (115.7-157.1)          | 42 (36.5-44.7)       | 63.2 (53.3-68)         |
| <b>Other malignant neoplasms</b>               | 542.9 (434-639.8)            | 170.6 (149.5-183.5)  | 350.9 (293.3-380.8)    |
| <b>Other pharynx cancer</b>                    | 44.3 (35.9-53.1)             | 27 (25.6-28.4)       | 78.3 (72.4-84)         |
| <b>Ovarian cancer</b>                          | 212.5 (147.4-268.1)          | 174.8 (156.9-189.5)  | 276.2 (240.1-301.1)    |
| <b>Pancreatic cancer</b>                       | 990.2 (846.4-1146.4)         | 536.9 (499.8-563.7)  | 865.6 (780.7-923.6)    |
| <b>Prostate cancer</b>                         | 532.2 (420.5-696.7)          | 477.8 (408.1-697.8)  | 951.3 (787.2-1320.8)   |
| <b>Stomach cancer</b>                          | 3628 (3052.9-4225.4)         | 172.4 (158.9-180.6)  | 589.7 (529.4-626)      |
| <b>Testicular cancer</b>                       | 6.6 (5.2-8)                  | 1.9 (1.7-2)          | 4 (3.6-4.4)            |
| <b>Thyroid cancer</b>                          | 59.1 (48.7-69)               | 22.5 (20.2-23.6)     | 39.8 (34.6-42.8)       |
| <b>Tracheal, bronchus, and lung cancer</b>     | 6688.9 (5651.6-7824.3)       | 1944 (1821.1-2023.8) | 2422.3 (2257.5-2517.3) |
| <b>Uterine cancer</b>                          | 91.6 (71.3-133.6)            | 95.9 (88.9-101)      | 131.7 (115.8-140.4)    |
| <b>Cause</b>                                   | <b>ASDR in 1990 (95% UI)</b> |                      |                        |
|                                                | <b>China</b>                 | <b>United States</b> | <b>Western Europe</b>  |
| <b>All malignant neoplasms</b>                 | 790 (648-934.1)              | 826 (754.3-870.7)    | 836.7 (768.5-891.4)    |
| <b>Bladder cancer</b>                          | 13.9 (11.9-15.8)             | 20.1 (18.6-21.1)     | 34.2 (32.1-35.8)       |
| <b>Brain and central nervous system cancer</b> | 11.6 (9.2-15.7)              | 15.7 (13.1-19)       | 14.5 (12.4-18.7)       |
| <b>Breast cancer</b>                           | 17.9 (14.9-21.2)             | 68 (63.3-70.9)       | 71.2 (66.3-74.5)       |
| <b>Cervical cancer</b>                         | 12.2 (9.7-19.3)              | 7.3 (6.3-7.8)        | 9.8 (8.7-10.7)         |
| <b>Colon and rectum cancer</b>                 | 48.6 (42.5-55.2)             | 105.3 (98.3-109.7)   | 118.1 (110.6-123)      |
| <b>Esophageal cancer</b>                       | 114.3 (73.3-134.4)           | 18.1 (17.2-18.9)     | 22.3 (21.2-23.2)       |
| <b>Gallbladder and biliary tract cancer</b>    | 8.3 (6.7-13.4)               | 7.2 (5.9-7.9)        | 16 (12.4-17.4)         |
| <b>Hodgkin lymphoma</b>                        | 1.8 (1-2.4)                  | 1.7 (1.3-1.9)        | 2 (1.6-2.3)            |
| <b>Kidney cancer</b>                           | 3 (2.5-3.4)                  | 17.7 (16.6-18.5)     | 17.4 (16.3-18.5)       |
| <b>Larynx cancer</b>                           | 6.9 (5.8-7.9)                | 6.7 (6.3-7)          | 11 (10.5-11.6)         |

|                                                |                     |                              |                       |
|------------------------------------------------|---------------------|------------------------------|-----------------------|
| <b>Leukemia</b>                                | 12.8 (10.6-15.7)    | 29.8 (27.8-31.2)             | 24.4 (22.9-25.5)      |
| <b>Lip and oral cavity cancer</b>              | 4.2 (3.6-4.8)       | 9.2 (8.7-9.6)                | 9.9 (9.3-10.4)        |
| <b>Liver cancer</b>                            | 103.1 (86.7-124)    | 9.9 (9.3-10.3)               | 17.7 (16.7-18.6)      |
| <b>Malignant skin melanoma</b>                 | 1.3 (0.9-1.9)       | 8.9 (6.5-11.6)               | 6.5 (5.2-9.3)         |
| <b>Mesothelioma</b>                            | 0.6 (0.4-0.8)       | 3.6 (3.3-4)                  | 5.7 (5-6.4)           |
| <b>Multiple myeloma</b>                        | 3.1 (2.5-4.4)       | 16.7 (13.7-17.6)             | 12.3 (11-14)          |
| <b>Nasopharynx cancer</b>                      | 10.7 (9-12.7)       | 1.3 (1.3-1.4)                | 1.8 (1.6-1.9)         |
| <b>Non-Hodgkin lymphoma</b>                    | 6.9 (6-7.9)         | 32 (30.1-33.2)               | 20.9 (19.8-21.8)      |
| <b>Non-melanoma skin cancer</b>                | 3.5 (3-4.1)         | 3.6 (3.3-3.8)                | 3.4 (3-3.6)           |
| <b>Other malignant neoplasms</b>               | 18.6 (15.9-22)      | 17.3 (15.3-19.1)             | 25.1 (21.4-26.7)      |
| <b>Other pharynx cancer</b>                    | 1.6 (1.3-1.8)       | 3.1 (2.9-3.3)                | 5 (4.7-5.4)           |
| <b>Ovarian cancer</b>                          | 3.5 (2.7-5.6)       | 22 (19.5-23.3)               | 22.3 (19.8-23.6)      |
| <b>Pancreatic cancer</b>                       | 16.2 (14-18.5)      | 46.2 (43.3-48.1)             | 44.1 (41.5-45.9)      |
| <b>Prostate cancer</b>                         | 18.2 (13.7-23.4)    | 61 (41.7-69.1)               | 58.7 (43.6-71.9)      |
| <b>Stomach cancer</b>                          | 186.2 (161.9-211.5) | 29.8 (27.9-31)               | 71.6 (67.3-74.4)      |
| <b>Testicular cancer</b>                       | 0.2 (0.1-0.2)       | 0.2 (0.2-0.2)                | 0.3 (0.3-0.4)         |
| <b>Thyroid cancer</b>                          | 1.9 (1.6-2.6)       | 1.9 (1.8-2.1)                | 3.4 (3.1-3.6)         |
| <b>Tracheal, bronchus, and lung cancer</b>     | 153.5 (132.2-176.7) | 252.6 (242.3-259.3)          | 178.7 (172.5-183.5)   |
| <b>Uterine cancer</b>                          | 5.3 (4.1-6.7)       | 9.2 (8.4-9.8)                | 8.4 (7.7-9)           |
|                                                |                     | <b>ASDR in 2019 (95% UI)</b> |                       |
| <b>Cause</b>                                   | <b>China</b>        | <b>United States</b>         | <b>Western Europe</b> |
| <b>All malignant neoplasms</b>                 | 688.8 (561.2-817.5) | 692.4 (621.9-766.4)          | 696.2 (611.2-775.4)   |
| <b>Bladder cancer</b>                          | 12.3 (10.4-14.5)    | 21.3 (19.1-23.2)             | 27 (23.9-29.8)        |
| <b>Brain and central nervous system cancer</b> | 12.4 (8.8-15.2)     | 16.3 (11.8-18.4)             | 15.8 (9.5-18.4)       |
| <b>Breast cancer</b>                           | 20.5 (16.5-25)      | 46.2 (41.6-49.8)             | 50.6 (44.6-55.3)      |
| <b>Cervical cancer</b>                         | 10.4 (6.2-13.2)     | 5.9 (4.8-6.5)                | 5.7 (4.9-6.5)         |

|                                             |                    |                      |                     |
|---------------------------------------------|--------------------|----------------------|---------------------|
| <b>Colon and rectum cancer</b>              | 68.8 (58.5-79.5)   | 74.7 (68.2-79.3)     | 92.8 (83.3-99.7)    |
| <b>Esophageal cancer</b>                    | 70.3 (52.5-84.2)   | 19.9 (18.4-21.3)     | 20 (18.1-21.7)      |
| <b>Gallbladder and biliary tract cancer</b> | 9.6 (6.9-11.5)     | 4.9 (4.3-6.1)        | 9.3 (7.7-10.9)      |
| <b>Hodgkin lymphoma</b>                     | 0.6 (0.4-0.7)      | 1.1 (0.9-1.4)        | 1.1 (0.9-1.4)       |
| <b>Kidney cancer</b>                        | 5.8 (4.8-6.9)      | 18 (16.2-19.6)       | 19 (16.8-21)        |
| <b>Larynx cancer</b>                        | 5.3 (4.3-6.3)      | 4.6 (4.2-4.9)        | 5.6 (5.1-6.1)       |
| <b>Leukemia</b>                             | 10.2 (8.3-12.3)    | 27.4 (24.8-29.5)     | 23.3 (20.3-25.4)    |
| <b>Lip and oral cavity cancer</b>           | 5.6 (4.7-6.7)      | 7 (6.4-7.5)          | 7.9 (7.2-8.6)       |
| <b>Liver cancer</b>                         | 39.4 (33.1-46.4)   | 21.8 (18.9-24.4)     | 23 (20.6-25.1)      |
| <b>Malignant skin melanoma</b>              | 1.2 (0.7-1.5)      | 10 (6.8-12.5)        | 8 (4.7-9.4)         |
| <b>Mesothelioma</b>                         | 0.6 (0.5-0.7)      | 3.1 (2.8-3.4)        | 6 (5.4-6.5)         |
| <b>Multiple myeloma</b>                     | 3.3 (2.4-4.1)      | 16.9 (14.8-20.2)     | 14.5 (11.6-16.3)    |
| <b>Nasopharynx cancer</b>                   | 5.6 (4.6-6.7)      | 0.9 (0.8-1)          | 1 (0.9-1.2)         |
| <b>Non-Hodgkin lymphoma</b>                 | 9.7 (8.2-11.5)     | 27.2 (24.8-29.1)     | 20.4 (18.3-22.1)    |
| <b>Non-melanoma skin cancer</b>             | 4.6 (3.8-5.4)      | 4 (3.5-4.4)          | 3.3 (2.8-3.6)       |
| <b>Other malignant neoplasms</b>            | 16.8 (13.3-19.9)   | 16.9 (14.5-18.7)     | 20.5 (17-22.8)      |
| <b>Other pharynx cancer</b>                 | 1.3 (1.1-1.6)      | 2.8 (2.5-3)          | 5.5 (4.7-6.3)       |
| <b>Ovarian cancer</b>                       | 6.2 (4.3-7.9)      | 17.5 (15.5-19.6)     | 16.9 (14.6-19)      |
| <b>Pancreatic cancer</b>                    | 30.2 (25.5-35.1)   | 53.6 (49.1-57.3)     | 51.7 (46.3-56.4)    |
| <b>Prostate cancer</b>                      | 17.7 (13.6-23.3)   | 46 (38.8-69)         | 50.9 (41.8-72.7)    |
| <b>Stomach cancer</b>                       | 111.6 (93.2-130.8) | 17 (15.5-18.1)       | 33.8 (30.2-36.5)    |
| <b>Testicular cancer</b>                    | 0.2 (0.2-0.3)      | 0.2 (0.2-0.2)        | 0.2 (0.2-0.3)       |
| <b>Thyroid cancer</b>                       | 1.9 (1.5-2.3)      | 2.2 (2-2.4)          | 2.3 (2-2.6)         |
| <b>Tracheal, bronchus, and lung cancer</b>  | 204.1 (170.8-240)  | 195.2 (181.9-205.7)  | 152.3 (140.9-161.4) |
| <b>Uterine cancer</b>                       | 2.7 (2.1-4.1)      | 9.6 (8.6-10.4)       | 7.8 (6.8-8.6)       |
| <b>Cause</b>                                |                    | <b>AAPC (95% CI)</b> |                     |



|                                                | <b>China</b>           | <b>United States</b>   | <b>Western Europe</b>  |
|------------------------------------------------|------------------------|------------------------|------------------------|
| <b>All malignant neoplasms</b>                 | -0.5 (-0.65 to -0.35)  | -0.62 (-0.77 to -0.46) | -0.64 (-0.7 to -0.59)  |
| <b>Bladder cancer</b>                          | -0.45 (-0.67 to -0.22) | 0.2 (0.18 to 0.22)     | -0.84 (-0.9 to -0.79)  |
| <b>Brain and central nervous system cancer</b> | 0.23 (0.04 to 0.42)    | 0.12 (0.01 to 0.22)    | 0.29 (0.22 to 0.37)    |
| <b>Breast cancer</b>                           | 0.38 (0.17 to 0.6)     | -1.37 (-1.46 to -1.27) | -1.17 (-1.28 to -1.07) |
| <b>Cervical cancer</b>                         | -0.6 (-0.96 to -0.24)  | -0.74 (-0.92 to -0.55) | -1.83 (-1.96 to -1.71) |
| <b>Colon and rectum cancer</b>                 | 1.18 (0.91 to 1.44)    | -1.21 (-1.37 to -1.04) | -0.85 (-0.99 to -0.71) |
| <b>Esophageal cancer</b>                       | -1.73 (-1.86 to -1.59) | 0.33 (0.23 to 0.42)    | -0.38 (-0.44 to -0.32) |
| <b>Gallbladder and biliary tract cancer</b>    | 0.49 (0.34 to 0.63)    | -1.31 (-1.38 to -1.23) | -1.86 (-1.96 to -1.76) |
| <b>Hodgkin lymphoma</b>                        | -4.05 (-4.27 to -3.83) | -1.4 (-1.52 to -1.27)  | -2.06 (-2.16 to -1.96) |
| <b>Kidney cancer</b>                           | 2.3 (2.06 to 2.54)     | 0.08 (-0.05 to 0.22)   | 0.28 (0.2 to 0.36)     |
| <b>Larynx cancer</b>                           | -0.92 (-1.1 to -0.74)  | -1.29 (-1.43 to -1.14) | -2.36 (-2.43 to -2.29) |
| <b>Leukemia</b>                                | -0.77 (-0.93 to -0.62) | -0.29 (-0.42 to -0.15) | -0.16 (-0.27 to -0.05) |
| <b>Lip and oral cavity cancer</b>              | 0.94 (0.79 to 1.1)     | -0.93 (-1.1 to -0.75)  | -0.77 (-0.89 to -0.65) |
| <b>Liver cancer</b>                            | -3.24 (-3.59 to -2.9)  | 2.77 (2.62 to 2.92)    | 0.89 (0.79 to 0.99)    |
| <b>Malignant skin melanoma</b>                 | -0.36 (-0.46 to -0.25) | 0.42 (0.25 to 0.58)    | 0.72 (0.6 to 0.84)     |
| <b>Mesothelioma</b>                            | 0.03 (-0.17 to 0.22)   | -0.55 (-0.66 to -0.43) | 0.17 (0.07 to 0.27)    |
| <b>Multiple myeloma</b>                        | 0.13 (0.01 to 0.25)    | 0.05 (-0.02 to 0.12)   | 0.57 (0.5 to 0.65)     |
| <b>Nasopharynx cancer</b>                      | -2.27 (-2.48 to -2.07) | -1.34 (-1.48 to -1.2)  | -1.82 (-1.94 to -1.7)  |
| <b>Non-Hodgkin lymphoma</b>                    | 1.15 (0.88 to 1.42)    | -0.56 (-0.74 to -0.38) | -0.09 (-0.18 to 0)     |
| <b>Non-melanoma skin cancer</b>                | 0.87 (0.69 to 1.05)    | 0.34 (0.18 to 0.5)     | -0.11 (-0.2 to -0.02)  |
| <b>Other malignant neoplasms</b>               | -0.38 (-0.52 to -0.24) | -0.07 (-0.13 to -0.01) | -0.69 (-0.81 to -0.58) |
| <b>Other pharynx cancer</b>                    | -0.61 (-0.78 to -0.45) | -0.36 (-0.55 to -0.17) | 0.28 (0.14 to 0.42)    |
| <b>Ovarian cancer</b>                          | 1.92 (1.73 to 2.12)    | -0.77 (-0.95 to -0.59) | -0.96 (-1.11 to -0.8)  |
| <b>Pancreatic cancer</b>                       | 2.14 (1.86 to 2.43)    | 0.53 (0.31 to 0.75)    | 0.53 (0.4 to 0.66)     |
| <b>Prostate cancer</b>                         | -0.12 (-0.26 to 0.02)  | -0.96 (-1.05 to -0.88) | -0.5 (-0.55 to -0.44)  |

|                                            |                        |                        |                        |
|--------------------------------------------|------------------------|------------------------|------------------------|
| <b>Stomach cancer</b>                      | -1.79 (-1.96 to -1.62) | -1.91 (-2.1 to -1.72)  | -2.57 (-2.72 to -2.43) |
| <b>Testicular cancer</b>                   | 0.58 (0.21 to 0.95)    | 0.03 (-0.08 to 0.13)   | -1.03 (-1.14 to -0.92) |
| <b>Thyroid cancer</b>                      | -0.1 (-0.31 to 0.11)   | 0.48 (0.31 to 0.65)    | -1.33 (-1.5 to -1.15)  |
| <b>Tracheal, bronchus, and lung cancer</b> | 0.94 (0.69 to 1.19)    | -0.87 (-1.05 to -0.69) | -0.54 (-0.68 to -0.41) |
| <b>Uterine cancer</b>                      | -2.26 (-2.62 to -1.89) | 0.11 (-0.02 to 0.23)   | -0.24 (-0.3 to -0.18)  |

**Note:** Estimates are for populations aged 55 years and above, both sexes combined. All malignant cancers are the sum of the following 29 cancers. Rates are reported per 100000 person-years. Cancer types are listed alphabetically. Other malignant neoplasms are cancers without a detailed GBD cause separately listed. UI=uncertainty interval. ASDR=age-standardized death rate. AAPC=average annual percentage change. CI = confidence interval. UI = uncertainty intervals.

**Table S4** The DALYs and DALY rate of 29 cancers among men and women over 55+ years old in China in 1990 and 2019, and percentage change in DALYs, annual rate of change in DALY rate from 1990 to 2019.

| Cause                                          | DALYs*1000 in 1990 (95%<br>UI) |                          | DALYs*1000 in 2019 (95%<br>UI) |                           | Percentage change in DALYs (95% UI) |                           |
|------------------------------------------------|--------------------------------|--------------------------|--------------------------------|---------------------------|-------------------------------------|---------------------------|
|                                                | Men                            | Women                    | Men                            | Women                     | Men                                 | Women                     |
| <b>Bladder cancer</b>                          | 202.2<br>(169.2-235.5)         | 86.9<br>(71.9-104)       | 534.3<br>(435.2-648.3)         | 136.7<br>(110.3-166.9)    | 164.2<br>(103.6 to 241.7)           | 57.3<br>(17.3 to 110)     |
| <b>Brain and central nervous system cancer</b> | 210.8<br>(147.5-307.5)         | 169.5<br>(126.5-227.1)   | 504.5<br>(308.6-674.7)         | 404.8<br>(287.5-526.4)    | 139.3<br>(45.6 to 255.9)            | 138.8<br>(39.4 to 250.4)  |
| <b>Breast cancer</b>                           | 6.6<br>(5.2-8)                 | 586.4<br>(494.9-688.1)   | 54.3<br>(41.8-67.9)            | 1575<br>(1294.3-1904.2)   | 727.9<br>(490.4 to 1035.6)          | 168.6<br>(108.5 to 250)   |
| <b>Cervical cancer</b>                         | 0<br>(0-0)                     | 384.6<br>(303.3-616.5)   | 0<br>(0-0)                     | 804.4<br>(461.3-1026.7)   | 0<br>(0 to 0)                       | 109.2<br>(-9.7 to 201.8)  |
| <b>Colon and rectum cancer</b>                 | 678.7<br>(562.8-799.5)         | 593.1<br>(500.1-695.5)   | 2775.6<br>(2249.7-3401.8)      | 1610.9<br>(1325.3-1942.6) | 309<br>(211.4 to 431.7)             | 171.6<br>(112.3 to 250.3) |
| <b>Esophageal cancer</b>                       | 2214.1<br>(1386.6-2699.4)      | 1139.8<br>(611.6-1358.2) | 3615.2<br>(2757.4-4512.1)      | 1018.3<br>(708.7-1279.9)  | 63.3<br>(22.4 to 134.6)             | -10.7<br>(-31.7 to 30)    |
| <b>Gallbladder and biliary tract cancer</b>    | 91.6<br>(71.9-161.9)           | 115.4<br>(88.6-203.5)    | 301.1<br>(215.2-382.2)         | 285.7<br>(176.8-364.5)    | 228.8<br>(57.8 to 386.3)            | 147.6<br>(2.1 to 268.3)   |
| <b>Hodgkin lymphoma</b>                        | 35.8<br>(17.3-48)              | 22.1<br>(10-30.3)        | 27.7<br>(18.7-36.9)            | 14.5<br>(9.4-18.7)        | -22.5<br>(-47.9 to 49.2)            | -34.4<br>(-53.4 to 16)    |
| <b>Kidney cancer</b>                           | 47.7                           | 36.1                     | 269.9                          | 116.7                     | 465.8                               | 223                       |

|                                   |                 |               |                 |                |                  |                  |
|-----------------------------------|-----------------|---------------|-----------------|----------------|------------------|------------------|
|                                   | (38.7-59.1)     | (30.3-42.2)   | (210.2-336.3)   | (94.4-141.9)   | (298.8 to 698.5) | (151.2 to 318.5) |
| <b>Larynx cancer</b>              | 163.4           | 46.1          | 319.7           | 60.9           | 95.7             | 32               |
|                                   | (133.1-192.5)   | (38.9-53.6)   | (257.7-392.3)   | (49.5-73.5)    | (47.6 to 164.2)  | (3.6 to 69.2)    |
| <b>Leukemia</b>                   | 215.9           | 189.9         | 432             | 327.4          | 100              | 72.4             |
|                                   | (170-278.4)     | (154.7-233.4) | (318.3-548.6)   | (248.5-407.5)  | (41.9 to 179.2)  | (17.1 to 133.4)  |
| <b>Lip and oral cavity cancer</b> | 73.2            | 42.7          | 305.3           | 81.9           | 317.4            | 92               |
|                                   | (59.4-87.2)     | (35.5-50.7)   | (243.5-382.8)   | (66.5-99)      | (202.8 to 472.7) | (46.8 to 150.6)  |
| <b>Liver cancer</b>               | 2310.6          | 1085.6        | 2096.7          | 818.4          | -9.3             | -24.6            |
|                                   | (1842.6-2844.9) | (878.5-1342)  | (1644.7-2604.8) | (653.5-1000.2) | (-34 to 26.3)    | (-46.2 to 3.7)   |
| <b>Malignant skin melanoma</b>    | 17              | 17.6          | 35.2            | 40.2           | 106.6            | 129              |
|                                   | (10.6-24.6)     | (11.3-29.2)   | (20.7-49.7)     | (21.1-54.7)    | (36.2 to 192.4)  | (7.6 to 253)     |
| <b>Mesothelioma</b>               | 6.6             | 9.6           | 22.8            | 18.3           | 244.2            | 91.7             |
|                                   | (5.1-9.9)       | (6.5-15.4)    | (17.6-29.5)     | (11.8-23.7)    | (109.7 to 387.9) | (-1.1 to 219)    |
| <b>Multiple myeloma</b>           | 46.8            | 51.1          | 138.7           | 103.9          | 196.2            | 103.4            |
|                                   | (35-70.7)       | (38.1-74.2)   | (90.3-184.4)    | (75.1-135.1)   | (55.7 to 330.5)  | (9.5 to 179.5)   |
| <b>Nasopharynx cancer</b>         | 235.8           | 124.5         | 337.5           | 118.5          | 43.2             | -4.8             |
|                                   | (191.4-283.9)   | (99.8-150.3)  | (266.8-417.6)   | (94.1-144.9)   | (5.9 to 95)      | (-28.8 to 29.3)  |
| <b>Non-Hodgkin lymphoma</b>       | 118.3           | 84.5          | 480.6           | 247.8          | 306.3            | 193.3            |
|                                   | (95.9-143.2)    | (70.7-98.7)   | (382.4-595.8)   | (201.6-301.2)  | (199.4 to 455.2) | (129.5 to 275.6) |
| <b>Non-melanoma skin cancer</b>   | 44.3            | 35.2          | 131             | 113.7          | 195.6            | 223.2            |
|                                   | (36.7-51.8)     | (29.3-41.9)   | (106.3-159.6)   | (86.8-140.7)   | (125.5 to 289.4) | (129.2 to 329.7) |
| <b>Other malignant neoplasms</b>  | 284.5           | 242.8         | 682.5           | 458.2          | 139.9            | 88.7             |
|                                   | (224.7-346.3)   | (198.3-293.4) | (506.1-855.1)   | (360.5-566.4)  | (67 to 232.7)    | (36.7 to 151.6)  |
| <b>Other pharynx cancer</b>       | 34.7            | 12.2          | 80              | 16.8           | 130.8            | 37.4             |
|                                   | (28.7-40.8)     | (10-14.4)     | (62.2-99.6)     | (13.5-20.4)    | (67 to 212.7)    | (2.5 to 82.6)    |

|                                                |                                   |                           |                                   |                           |                                                    |                           |
|------------------------------------------------|-----------------------------------|---------------------------|-----------------------------------|---------------------------|----------------------------------------------------|---------------------------|
| <b>Ovarian cancer</b>                          | 0<br>(0-0)                        | 113<br>(85.9-176.7)       | 0<br>(0-0)                        | 490.1<br>(338.3-620)      | 0<br>(0 to 0)                                      | 333.8<br>(121.9 to 546.1) |
| <b>Pancreatic cancer</b>                       | 276.2<br>(224-335.7)              | 198.4<br>(165.8-231.5)    | 1208.5<br>(954-1498.9)            | 819.9<br>(665.1-998.7)    | 337.6<br>(215.7 to 514.9)                          | 313.3<br>(216.5 to 437.9) |
| <b>Prostate cancer</b>                         | 369.4<br>(282.8-445.2)            | 0<br>(0-0)                | 948.9<br>(753.9-1248)             | 0<br>(0-0)                | 156.9<br>(96.6 to 247.4)                           | 0<br>(0 to 0)             |
| <b>Stomach cancer</b>                          | 3579.7<br>(2931.5-4239.2)         | 1824.6<br>(1528.7-2128.4) | 5293.6<br>(4203.2-6488.4)         | 2010.4<br>(1635.5-2468.6) | 47.9<br>(11.2 to 96.7)                             | 10.2<br>(-14.3 to 44.2)   |
| <b>Testicular cancer</b>                       | 4.7<br>(3.9-5.7)                  | 0<br>(0-0)                | 14.2<br>(11.4-17.2)               | 0<br>(0-0)                | 200.7<br>(124.6 to 301.5)                          | 0<br>(0 to 0)             |
| <b>Thyroid cancer</b>                          | 18.4<br>(14.9-23.2)               | 31.5<br>(25.8-42.9)       | 64.8<br>(49.7-80.1)               | 53.1<br>(43-65.1)         | 251.5<br>(140.7 to 380.1)                          | 68.3<br>(23.9 to 123)     |
| <b>Tracheal, bronchus, and lung cancer</b>     | 3268.7<br>(2671.2-3927.8)         | 1351<br>(1122-1585.3)     | 9479.7<br>(7467.5-11725.2)        | 3964.8<br>(3220.9-4834.6) | 190<br>(109.4 to 292.8)                            | 193.5<br>(126.4 to 282.5) |
| <b>Uterine cancer</b>                          | 0<br>(0-0)                        | 169.8<br>(132-209.5)      | 0<br>(0-0)                        | 217.2<br>(172.2-314)      | 0<br>(0 to 0)                                      | 27.9<br>(-3.5 to 82.6)    |
| <b>Cause</b>                                   | <b>DALY rate in 1990 (95% UI)</b> |                           | <b>DALY rate in 2019 (95% UI)</b> |                           | <b>Annual rate of change in DALY rate (95% UI)</b> |                           |
|                                                | <b>Men</b>                        | <b>Women</b>              | <b>Men</b>                        | <b>Women</b>              | <b>Men</b>                                         | <b>Women</b>              |
| <b>Bladder cancer</b>                          | 168.1<br>(140.6-195.7)            | 63.8<br>(52.9-76.4)       | 169.3<br>(137.8-205.4)            | 38.8<br>(31.3-47.3)       | 0.01<br>(-0.22 to 0.3)                             | -0.39<br>(-0.55 to -0.19) |
| <b>Brain and central nervous system cancer</b> | 175.2<br>(122.6-255.5)            | 124.6<br>(93-166.9)       | 159.8<br>(97.8-213.7)             | 114.8<br>(81.5-149.3)     | -0.09<br>(-0.45 to 0.36)                           | -0.08<br>(-0.46 to 0.35)  |
| <b>Breast cancer</b>                           | 5.5                               | 430.9                     | 17.2                              | 446.7                     | 2.16                                               | 0.04                      |

|                                             |                 |               |                |               |                  |                  |
|---------------------------------------------|-----------------|---------------|----------------|---------------|------------------|------------------|
|                                             | (4.4-6.7)       | (363.7-505.7) | (13.3-21.5)    | (367-540)     | (1.25 to 3.33)   | (-0.2 to 0.35)   |
| <b>Cervical cancer</b>                      | 0               | 282.6         | 0              | 228.1         | 0                | -0.19            |
|                                             | (0-0)           | (222.9-453.1) | (0-0)          | (130.8-291.2) | (0 to 0)         | (-0.65 to 0.16)  |
| <b>Colon and rectum cancer</b>              | 564.1           | 435.9         | 879.2          | 456.8         | 0.56             | 0.05             |
|                                             | (467.8-664.5)   | (367.6-511.2) | (712.6-1077.6) | (375.8-550.9) | (0.19 to 1.03)   | (-0.18 to 0.35)  |
| <b>Esophageal cancer</b>                    | 1840.2          | 837.7         | 1145.2         | 288.8         | -0.38            | -0.66            |
|                                             | (1152.4-2243.6) | (449.5-998.2) | (873.4-1429.3) | (201-363)     | (-0.53 to -0.11) | (-0.74 to -0.5)  |
| <b>Gallbladder and biliary tract cancer</b> | 76.1            | 84.8          | 95.4           | 81            | 0.25             | -0.04            |
|                                             | (59.7-134.6)    | (65.1-149.6)  | (68.2-121.1)   | (50.1-103.4)  | (-0.4 to 0.85)   | (-0.61 to 0.42)  |
| <b>Hodgkin lymphoma</b>                     | 29.7            | 16.2          | 8.8            | 4.1           | -0.7             | -0.75            |
|                                             | (14.4-39.9)     | (7.3-22.2)    | (5.9-11.7)     | (2.7-5.3)     | (-0.8 to -0.43)  | (-0.82 to -0.55) |
| <b>Kidney cancer</b>                        | 39.7            | 26.5          | 85.5           | 33.1          | 1.16             | 0.25             |
|                                             | (32.1-49.1)     | (22.3-31)     | (66.6-106.5)   | (26.8-40.2)   | (0.52 to 2.04)   | (-0.03 to 0.61)  |
| <b>Larynx cancer</b>                        | 135.8           | 33.9          | 101.3          | 17.3          | -0.25            | -0.49            |
|                                             | (110.6-160)     | (28.6-39.4)   | (81.6-124.3)   | (14-20.8)     | (-0.44 to 0.01)  | (-0.6 to -0.35)  |
| <b>Leukemia</b>                             | 179.5           | 139.6         | 136.8          | 92.8          | -0.24            | -0.33            |
|                                             | (141.3-231.4)   | (113.7-171.5) | (100.8-173.8)  | (70.5-115.6)  | (-0.46 to 0.06)  | (-0.55 to -0.1)  |
| <b>Lip and oral cavity cancer</b>           | 60.8            | 31.4          | 96.7           | 23.2          | 0.59             | -0.26            |
|                                             | (49.4-72.5)     | (26.1-37.3)   | (77.1-121.3)   | (18.9-28.1)   | (0.15 to 1.18)   | (-0.43 to -0.03) |
| <b>Liver cancer</b>                         | 1920.4          | 797.9         | 664.2          | 232.1         | -0.65            | -0.71            |
|                                             | (1531.5-2364.5) | (645.6-986.2) | (521-825.1)    | (185.3-283.6) | (-0.75 to -0.52) | (-0.79 to -0.6)  |
| <b>Malignant skin melanoma</b>              | 14.2            | 12.9          | 11.1           | 11.4          | -0.21            | -0.12            |
|                                             | (8.8-20.5)      | (8.3-21.5)    | (6.5-15.7)     | (6-15.5)      | (-0.48 to 0.11)  | (-0.58 to 0.36)  |
| <b>Mesothelioma</b>                         | 5.5             | 7             | 7.2            | 5.2           | 0.31             | -0.26            |

|                                  |                 |                 |                 |               |                  |                  |
|----------------------------------|-----------------|-----------------|-----------------|---------------|------------------|------------------|
|                                  | (4.2-8.2)       | (4.8-11.3)      | (5.6-9.3)       | (3.3-6.7)     | (-0.2 to 0.86)   | (-0.62 to 0.23)  |
| <b>Multiple myeloma</b>          | 38.9            | 37.5            | 43.9            | 29.5          | 0.13             | -0.22            |
|                                  | (29.1-58.7)     | (28-54.5)       | (28.6-58.4)     | (21.3-38.3)   | (-0.41 to 0.64)  | (-0.58 to 0.08)  |
| <b>Nasopharynx cancer</b>        | 195.9           | 91.5            | 106.9           | 33.6          | -0.45            | -0.63            |
|                                  | (159.1-236)     | (73.4-110.4)    | (84.5-132.3)    | (26.7-41.1)   | (-0.6 to -0.26)  | (-0.73 to -0.5)  |
| <b>Non-Hodgkin lymphoma</b>      | 98.3            | 62.1            | 152.2           | 70.3          | 0.55             | 0.13             |
|                                  | (79.7-119)      | (52-72.5)       | (121.1-188.7)   | (57.2-85.4)   | (0.14 to 1.12)   | (-0.11 to 0.45)  |
| <b>Non-melanoma skin cancer</b>  | 36.8            | 25.9            | 41.5            | 32.3          | 0.13             | 0.25             |
|                                  | (30.5-43.1)     | (21.5-30.8)     | (33.7-50.5)     | (24.6-39.9)   | (-0.14 to 0.48)  | (-0.12 to 0.66)  |
| <b>Other malignant neoplasms</b> | 236.5           | 178.5           | 216.2           | 129.9         | -0.09            | -0.27            |
|                                  | (186.8-287.8)   | (145.8-215.6)   | (160.3-270.9)   | (102.2-160.6) | (-0.36 to 0.27)  | (-0.47 to -0.03) |
| <b>Other pharynx cancer</b>      | 28.8            | 9               | 25.3            | 4.8           | -0.12            | -0.47            |
|                                  | (23.9-33.9)     | (7.3-10.6)      | (19.7-31.6)     | (3.8-5.8)     | (-0.36 to 0.19)  | (-0.6 to -0.3)   |
| <b>Ovarian cancer</b>            | 0               | 83              | 0               | 139           | 0                | 0.67             |
|                                  | (0-0)           | (63.1-129.9)    | (0-0)           | (95.9-175.8)  | (0 to 0)         | (-0.14 to 1.49)  |
| <b>Pancreatic cancer</b>         | 229.5           | 145.8           | 382.8           | 232.5         | 0.67             | 0.59             |
|                                  | (186.2-279)     | (121.9-170.2)   | (302.2-474.8)   | (188.6-283.2) | (0.2 to 1.34)    | (0.22 to 1.08)   |
| <b>Prostate cancer</b>           | 307             | 0               | 300.6           | 0             | -0.02            | 0                |
|                                  | (235-370.1)     | (0-0)           | (238.8-395.3)   | (0-0)         | (-0.25 to 0.32)  | (0 to 0)         |
| <b>Stomach cancer</b>            | 2975.2          | 1341            | 1676.8          | 570.1         | -0.44            | -0.57            |
|                                  | (2436.5-3523.3) | (1123.5-1564.2) | (1331.4-2055.3) | (463.8-700.1) | (-0.58 to -0.25) | (-0.67 to -0.44) |
| <b>Testicular cancer</b>         | 3.9             | 0               | 4.5             | 0             | 0.15             | 0                |
|                                  | (3.2-4.7)       | (0-0)           | (3.6-5.5)       | (0-0)         | (-0.14 to 0.53)  | (0 to 0)         |
| <b>Thyroid cancer</b>            | 15.3            | 23.2            | 20.5            | 15.1          | 0.34             | -0.35            |
|                                  | (12.4-19.3)     | (18.9-31.5)     | (15.7-25.4)     | (12.2-18.5)   | (-0.08 to 0.83)  | (-0.52 to -0.14) |

|                                            |                           |                         |                           |                        |                       |                          |
|--------------------------------------------|---------------------------|-------------------------|---------------------------|------------------------|-----------------------|--------------------------|
| <b>Tracheal, bronchus, and lung cancer</b> | 2716.8<br>(2220.1-3264.5) | 992.9<br>(824.6-1165.1) | 3002.8<br>(2365.4-3714.1) | 1124.4<br>(913.4-1371) | 0.11<br>(-0.2 to 0.5) | 0.13<br>(-0.13 to 0.48)  |
| <b>Uterine cancer</b>                      | 0<br>(0-0)                | 124.8<br>(97-154)       | 0<br>(0-0)                | 61.6<br>(48.8-89)      | 0<br>(0 to 0)         | -0.51<br>(-0.63 to -0.3) |

**Note:** Estimates are for populations aged 55 years and above among men and women in China. Rates are reported per 100000 person-years. Cancer types are listed alphabetically. Other malignant neoplasms are cancers without a detailed GBD cause separately listed. DALYs=disability-adjusted life-years. UI=uncertainty interval.



**Table S5** The death cases and death rate of 29 cancers among men and women over 55+ years old in China in 1990 and 2019, and percentage change in death cases, annual rate of change in death rate from 1990 to 2019

| Cause                                          | Deaths*100 in 1990 (95% UI) |                        | Deaths*100 in 2019 (95% UI) |                        | Percentage change in deaths (95% UI) |                           |
|------------------------------------------------|-----------------------------|------------------------|-----------------------------|------------------------|--------------------------------------|---------------------------|
|                                                | Men                         | Women                  | Men                         | Women                  | Men                                  | Women                     |
| <b>Bladder cancer</b>                          | 102.5<br>(86.2-118.1)       | 45.7<br>(38.1-54.5)    | 290<br>(236.5-351.7)        | 79.7<br>(64.4-97.6)    | 182.9<br>(119.1 to 264.1)            | 74.6<br>(31 to 131.5)     |
| <b>Brain and central nervous system cancer</b> | 86.1<br>(61.1-125.7)        | 72.5<br>(55.7-98.6)    | 226.9<br>(136.8-297.2)      | 189.5<br>(132.2-244.5) | 163.4<br>(58.9 to 280.9)             | 161.6<br>(49.3 to 272.5)  |
| <b>Breast cancer</b>                           | 2.7<br>(2.2-3.3)            | 233.6<br>(196.2-274.7) | 22.2<br>(17.1-27.6)         | 655.8<br>(527.7-803.4) | 717.4<br>(485.6 to 1025.8)           | 180.7<br>(118.6 to 264.7) |
| <b>Cervical cancer</b>                         | 0<br>(0-0)                  | 163<br>(129.5-259.2)   | 0<br>(0-0)                  | 350.1<br>(205.4-446.1) | 0<br>(0 to 0)                        | 114.8<br>(-2.7 to 207.6)  |
| <b>Colon and rectum cancer</b>                 | 303<br>(252.5-353.7)        | 279.9<br>(236.3-327.9) | 1340.4<br>(1084.5-1632.4)   | 834<br>(677.7-1004.9)  | 342.3<br>(239 to 472.1)              | 197.9<br>(134.9 to 280.9) |
| <b>Esophageal cancer</b>                       | 953<br>(598-1149.3)         | 541.3<br>(302.2-640.2) | 1729.8<br>(1305.8-2140.7)   | 567.1<br>(380.3-715.1) | 81.5<br>(37.5 to 155.9)              | 4.8<br>(-19 to 44.4)      |
| <b>Gallbladder and biliary tract cancer</b>    | 42.2<br>(33.5-73.3)         | 55.9<br>(43.4-98.8)    | 152<br>(110.9-191.2)        | 150.8<br>(92.5-192.1)  | 259.9<br>(76.8 to 424.1)             | 169.8<br>(13.1 to 296.2)  |
| <b>Hodgkin lymphoma</b>                        | 14.9<br>(7.2-19.9)          | 10<br>(4.6-13.5)       | 12.1<br>(7.9-16)            | 6.8<br>(4.3-8.8)       | -18.7<br>(-45.1 to 56.6)             | -32.2<br>(-51.7 to 18.1)  |
| <b>Kidney cancer</b>                           | 20.6<br>(16.7-25.2)         | 16.5<br>(14-19.1)      | 127.9<br>(99.8-158.3)       | 58.6<br>(47.1-71.2)    | 521.4<br>(346.9 to 771.1)            | 254.1<br>(176.2 to 358.6) |

|                                   |                         |                        |                         |                        |                           |                           |
|-----------------------------------|-------------------------|------------------------|-------------------------|------------------------|---------------------------|---------------------------|
| <b>Larynx cancer</b>              | 69.1<br>(56.8-80.9)     | 21.3<br>(18-24.6)      | 144.4<br>(115.6-177)    | 30.8<br>(24.8-37)      | 109<br>(58.1 to 178.9)    | 44.8<br>(13.9 to 84.7)    |
| <b>Leukemia</b>                   | 90.2<br>(71.7-116.4)    | 80.2<br>(65.5-100.3)   | 193.9<br>(142.6-246.7)  | 146.1<br>(111.4-182.3) | 114.9<br>(50.6 to 194.5)  | 82.2<br>(22.1 to 146.5)   |
| <b>Lip and oral cavity cancer</b> | 31.6<br>(25.8-37.4)     | 19.9<br>(16.7-23.5)    | 141.6<br>(114.3-175.1)  | 41.7<br>(33.8-50.3)    | 347.9<br>(227.5 to 513.9) | 109.7<br>(61.6 to 171.7)  |
| <b>Liver cancer</b>               | 931.5<br>(749.8-1140.5) | 485.7<br>(398.8-597.7) | 922.9<br>(733.9-1141.3) | 404.3<br>(325.6-493)   | -0.9<br>(-27.5 to 35.9)   | -16.8<br>(-40.1 to 12.8)  |
| <b>Malignant skin melanoma</b>    | 7.2<br>(4.5-10.4)       | 8.3<br>(5.4-13.8)      | 15.6<br>(9.5-22.3)      | 20.5<br>(11.1-27.6)    | 118.2<br>(49.6 to 203.7)  | 147.2<br>(18.2 to 272.8)  |
| <b>Mesothelioma</b>               | 2.8<br>(2.2-4.2)        | 4.3<br>(3-6.9)         | 10.2<br>(7.9-13.1)      | 8.9<br>(5.7-11.5)      | 260.8<br>(123.8 to 409.1) | 106.9<br>(8.2 to 239.4)   |
| <b>Multiple myeloma</b>           | 19.6<br>(14.9-30)       | 22.6<br>(17-32.7)      | 62.6<br>(40.6-83.5)     | 48.1<br>(34.6-62.6)    | 219.6<br>(66.9 to 360.8)  | 112.7<br>(16.7 to 188.8)  |
| <b>Nasopharynx cancer</b>         | 93.7<br>(76.7-111.8)    | 53.2<br>(42.7-64)      | 139<br>(109-171.5)      | 52.2<br>(41.2-64.4)    | 48.4<br>(11.5 to 101.4)   | -1.9<br>(-26.6 to 33.2)   |
| <b>Non-Hodgkin lymphoma</b>       | 49.9<br>(40.8-59.8)     | 38.6<br>(32.6-45.1)    | 209.5<br>(167.1-260)    | 115.8<br>(93.8-140.7)  | 319.5<br>(210.4 to 469.5) | 199.8<br>(134.9 to 284.1) |
| <b>Non-melanoma skin cancer</b>   | 21.7<br>(18-25.2)       | 17.6<br>(14.8-20.6)    | 71.2<br>(58.2-85.9)     | 65.7<br>(51-80.1)      | 228.1<br>(153.2 to 328.4) | 273.8<br>(167 to 387.5)   |
| <b>Other malignant neoplasms</b>  | 123.6<br>(98.2-149.7)   | 111.2<br>(91.7-134.8)  | 317.7<br>(231.2-398.3)  | 225.2<br>(177.8-279.5) | 157.1<br>(76.6 to 253.1)  | 102.6<br>(47 to 168.6)    |
| <b>Other pharynx cancer</b>       | 15<br>(12.5-17.6)       | 5.5<br>(4.6-6.5)       | 35.9<br>(28.2-44.6)     | 8.4<br>(6.7-10.2)      | 140.4<br>(75.6 to 223.1)  | 51.7<br>(15.1 to 100.6)   |
| <b>Ovarian cancer</b>             | 0                       | 46.9                   | 0                       | 212.5                  | 0                         | 352.6                     |

|                                                |                                    |               |                                    |                |                                                     |                  |
|------------------------------------------------|------------------------------------|---------------|------------------------------------|----------------|-----------------------------------------------------|------------------|
|                                                | (0-0)                              | (35.8-73.6)   | (0-0)                              | (147.4-268.1)  | (0 to 0)                                            | (135.4 to 572.4) |
| <b>Pancreatic cancer</b>                       | 118.3                              | 90.8          | 572.6                              | 417.6          | 384                                                 | 359.7            |
|                                                | (97.3-142.7)                       | (76.7-106)    | (455.8-703.6)                      | (338.1-506)    | (254.1 to 567.7)                                    | (255.6 to 492.9) |
| <b>Prostate cancer</b>                         | 196.3                              | 0             | 532.2                              | 0              | 171.1                                               | 0                |
|                                                | (152.8-238.5)                      | (0-0)         | (420.5-696.7)                      | (0-0)          | (107.7 to 254.2)                                    | (0 to 0)         |
| <b>Stomach cancer</b>                          | 1549.2                             | 861.6         | 2552.8                             | 1075.2         | 64.8                                                | 24.8             |
|                                                | (1275.3-1825.5)                    | (724.9-999.7) | (2045.9-3106.2)                    | (879.7-1312.1) | (25.2 to 116.8)                                     | (-1.7 to 60.9)   |
| <b>Testicular cancer</b>                       | 2.2                                | 0             | 6.6                                | 0              | 205.4                                               | 0                |
|                                                | (1.8-2.6)                          | (0-0)         | (5.2-8)                            | (0-0)          | (128.3 to 304.6)                                    | (0 to 0)         |
| <b>Thyroid cancer</b>                          | 8.3                                | 14.6          | 33.5                               | 25.7           | 302.5                                               | 75.5             |
|                                                | (6.8-10.5)                         | (12-20)       | (25.4-41.4)                        | (20.4-31.7)    | (167.2 to 446.2)                                    | (28.3 to 131.4)  |
| <b>Tracheal, bronchus, and lung cancer</b>     | 1412.2                             | 616.7         | 4632.9                             | 2056           | 228.1                                               | 233.4            |
|                                                | (1164.5-1688.9)                    | (516.8-723.5) | (3679.4-5703.5)                    | (1667-2466.8)  | (139.3 to 341.7)                                    | (160.7 to 326.2) |
| <b>Uterine cancer</b>                          | 0                                  | 70.9          | 0                                  | 91.6           | 0                                                   | 29.1             |
|                                                | (0-0)                              | (56-87.3)     | (0-0)                              | (71.3-133.6)   | (0 to 0)                                            | (-2.8 to 83.5)   |
| <b>Cause</b>                                   | <b>Death rate in 1990 (95% UI)</b> |               | <b>Death rate in 2019 (95% UI)</b> |                | <b>Annual rate of change in death rate (95% UI)</b> |                  |
|                                                | <b>Men</b>                         | <b>Women</b>  | <b>Men</b>                         | <b>Women</b>   | <b>Men</b>                                          | <b>Women</b>     |
| <b>Bladder cancer</b>                          | 14.4                               | 6.2           | 17                                 | 4.4            | 0.18                                                | -0.29            |
|                                                | (12.1-16.6)                        | (5.2-7.4)     | (13.8-20.6)                        | (3.6-5.4)      | (-0.09 to 0.51)                                     | (-0.47 to -0.06) |
| <b>Brain and central nervous system cancer</b> | 12.1                               | 9.9           | 13.3                               | 10.5           | 0.09                                                | 0.06             |
|                                                | (8.6-17.7)                         | (7.6-13.4)    | (8-17.4)                           | (7.3-13.5)     | (-0.34 to 0.58)                                     | (-0.39 to 0.51)  |
| <b>Breast cancer</b>                           | 0.4                                | 31.8          | 1.3                                | 36.3           | 2.4                                                 | 0.14             |
|                                                | (0.3-0.5)                          | (26.7-37.4)   | (1-1.6)                            | (29.2-44.4)    | (1.43 to 3.68)                                      | (-0.11 to 0.48)  |

|                                             |                        |                     |                       |                     |                           |                           |
|---------------------------------------------|------------------------|---------------------|-----------------------|---------------------|---------------------------|---------------------------|
| <b>Cervical cancer</b>                      | 0<br>(0-0)             | 22.2<br>(17.6-35.3) | 0<br>(0-0)            | 19.4<br>(11.4-24.7) | 0<br>(0 to 0)             | -0.13<br>(-0.6 to 0.25)   |
| <b>Colon and rectum cancer</b>              | 42.7<br>(35.6-49.8)    | 38.1<br>(32.1-44.6) | 78.4<br>(63.5-95.5)   | 46.1<br>(37.5-55.6) | 0.84<br>(0.41 to 1.38)    | 0.21<br>(-0.05 to 0.55)   |
| <b>Esophageal cancer</b>                    | 134.2<br>(84.2-161.9)  | 73.6<br>(41.1-87.1) | 101.2<br>(76.4-125.3) | 31.4<br>(21-39.5)   | -0.25<br>(-0.43 to 0.06)  | -0.57<br>(-0.67 to -0.41) |
| <b>Gallbladder and biliary tract cancer</b> | 5.9<br>(4.7-10.3)      | 7.6<br>(5.9-13.4)   | 8.9<br>(6.5-11.2)     | 8.3<br>(5.1-10.6)   | 0.5<br>(-0.27 to 1.18)    | 0.1<br>(-0.54 to 0.61)    |
| <b>Hodgkin lymphoma</b>                     | 2.1<br>(1-2.8)         | 1.4<br>(0.6-1.8)    | 0.7<br>(0.5-0.9)      | 0.4<br>(0.2-0.5)    | -0.66<br>(-0.77 to -0.35) | -0.72<br>(-0.8 to -0.52)  |
| <b>Kidney cancer</b>                        | 2.9<br>(2.3-3.6)       | 2.2<br>(1.9-2.6)    | 7.5<br>(5.8-9.3)      | 3.2<br>(2.6-3.9)    | 1.58<br>(0.86 to 2.62)    | 0.44<br>(0.12 to 0.86)    |
| <b>Larynx cancer</b>                        | 9.7<br>(8-11.4)        | 2.9<br>(2.5-3.3)    | 8.5<br>(6.8-10.4)     | 1.7<br>(1.4-2)      | -0.13<br>(-0.34 to 0.16)  | -0.41<br>(-0.54 to -0.25) |
| <b>Leukemia</b>                             | 12.7<br>(10.1-16.4)    | 10.9<br>(8.9-13.6)  | 11.3<br>(8.3-14.4)    | 8.1<br>(6.2-10.1)   | -0.11<br>(-0.37 to 0.22)  | -0.26<br>(-0.5 to 0)      |
| <b>Lip and oral cavity cancer</b>           | 4.5<br>(3.6-5.3)       | 2.7<br>(2.3-3.2)    | 8.3<br>(6.7-10.2)     | 2.3<br>(1.9-2.8)    | 0.86<br>(0.36 to 1.55)    | -0.15<br>(-0.34 to 0.1)   |
| <b>Liver cancer</b>                         | 131.2<br>(105.6-160.6) | 66.1<br>(54.2-81.3) | 54<br>(42.9-66.8)     | 22.4<br>(18-27.3)   | -0.59<br>(-0.7 to -0.44)  | -0.66<br>(-0.76 to -0.54) |
| <b>Malignant skin melanoma</b>              | 1<br>(0.6-1.5)         | 1.1<br>(0.7-1.9)    | 0.9<br>(0.6-1.3)      | 1.1<br>(0.6-1.5)    | -0.09<br>(-0.38 to 0.26)  | 0<br>(-0.52 to 0.52)      |
| <b>Mesothelioma</b>                         | 0.4<br>(0.3-0.6)       | 0.6<br>(0.4-0.9)    | 0.6<br>(0.5-0.8)      | 0.5<br>(0.3-0.6)    | 0.5<br>(-0.07 to 1.11)    | -0.16<br>(-0.56 to 0.38)  |
| <b>Multiple myeloma</b>                     | 2.8<br>(2.1-4.2)       | 3.1<br>(2.3-4.4)    | 3.7<br>(2.4-4.9)      | 2.7<br>(1.9-3.5)    | 0.33<br>(-0.31 to 0.91)   | -0.14<br>(-0.53 to 0.17)  |

|                                            |                        |                     |                        |                       |                           |                           |
|--------------------------------------------|------------------------|---------------------|------------------------|-----------------------|---------------------------|---------------------------|
| <b>Nasopharynx cancer</b>                  | 13.2<br>(10.8-15.7)    | 7.2<br>(5.8-8.7)    | 8.1<br>(6.4-10)        | 2.9<br>(2.3-3.6)      | -0.38<br>(-0.54 to -0.16) | -0.6<br>(-0.7 to -0.46)   |
| <b>Non-Hodgkin lymphoma</b>                | 7<br>(5.7-8.4)         | 5.3<br>(4.4-6.1)    | 12.3<br>(9.8-15.2)     | 6.4<br>(5.2-7.8)      | 0.74<br>(0.29 to 1.37)    | 0.22<br>(-0.05 to 0.56)   |
| <b>Non-melanoma skin cancer</b>            | 3.1<br>(2.5-3.6)       | 2.4<br>(2-2.8)      | 4.2<br>(3.4-5)         | 3.6<br>(2.8-4.4)      | 0.36<br>(0.05 to 0.78)    | 0.52<br>(0.09 to 0.98)    |
| <b>Other malignant neoplasms</b>           | 17.4<br>(13.8-21.1)    | 15.1<br>(12.5-18.3) | 18.6<br>(13.5-23.3)    | 12.5<br>(9.8-15.5)    | 0.07<br>(-0.27 to 0.47)   | -0.18<br>(-0.4 to 0.09)   |
| <b>Other pharynx cancer</b>                | 2.1<br>(1.8-2.5)       | 0.8<br>(0.6-0.9)    | 2.1<br>(1.6-2.6)       | 0.5<br>(0.4-0.6)      | 0<br>(-0.27 to 0.34)      | -0.38<br>(-0.53 to -0.18) |
| <b>Ovarian cancer</b>                      | 0<br>(0-0)             | 6.4<br>(4.9-10)     | 0<br>(0-0)             | 11.7<br>(8.2-14.8)    | 0<br>(0 to 0)             | 0.84<br>(-0.04 to 1.73)   |
| <b>Pancreatic cancer</b>                   | 16.7<br>(13.7-20.1)    | 12.4<br>(10.4-14.4) | 33.5<br>(26.7-41.2)    | 23.1<br>(18.7-28)     | 1.01<br>(0.47 to 1.77)    | 0.87<br>(0.45 to 1.41)    |
| <b>Prostate cancer</b>                     | 27.6<br>(21.5-33.6)    | 0<br>(0-0)          | 31.1<br>(24.6-40.8)    | 0<br>(0-0)            | 0.13<br>(-0.14 to 0.47)   | 0<br>(0 to 0)             |
| <b>Stomach cancer</b>                      | 218.2<br>(179.6-257.1) | 117.2<br>(98.6-136) | 149.4<br>(119.7-181.8) | 59.5<br>(48.6-72.5)   | -0.32<br>(-0.48 to -0.1)  | -0.49<br>(-0.6 to -0.35)  |
| <b>Testicular cancer</b>                   | 0.3<br>(0.2-0.4)       | 0<br>(0-0)          | 0.4<br>(0.3-0.5)       | 0<br>(0-0)            | 0.27<br>(-0.05 to 0.68)   | 0<br>(0 to 0)             |
| <b>Thyroid cancer</b>                      | 1.2<br>(1-1.5)         | 2<br>(1.6-2.7)      | 2<br>(1.5-2.4)         | 1.4<br>(1.1-1.8)      | 0.67<br>(0.11 to 1.27)    | -0.29<br>(-0.48 to -0.06) |
| <b>Tracheal, bronchus, and lung cancer</b> | 198.9<br>(164-237.9)   | 83.9<br>(70.3-98.4) | 271.1<br>(215.3-333.7) | 113.7<br>(92.2-136.4) | 0.36<br>(-0.01 to 0.83)   | 0.36<br>(0.06 to 0.73)    |
| <b>Uterine cancer</b>                      | 0<br>(0-0)             | 9.6<br>(7.6-11.9)   | 0<br>(0-0)             | 5.1<br>(3.9-7.4)      | 0<br>(0 to 0)             | -0.48<br>(-0.6 to -0.25)  |

**Note:** Estimates are for populations aged 55 years and above among men and women in China. Rates are reported per 100000 person-years. Cancer types are listed alphabetically. Other malignant neoplasms are cancers without a detailed GBD cause separately listed. UI=uncertainty interval.

**Table S6** The incident cases and incident rate of 29 cancers among men and women over 55+ years old in China in 1990 and 2019, and percentage change in incident cases, annual rate of change in incidence rate from 1990 to 2019

| Cause                                          | Incident cases*1000 in 1990<br>(95% UI) |                     | Incident cases*1000 in 2019<br>(95% UI) |                        | Percentage change in incident cases<br>(95% UI) |                           |
|------------------------------------------------|-----------------------------------------|---------------------|-----------------------------------------|------------------------|-------------------------------------------------|---------------------------|
|                                                | Men                                     | Women               | Men                                     | Women                  | Men                                             | Women                     |
| <b>Bladder cancer</b>                          | 13.9<br>(11.7-16.3)                     | 5.4<br>(4.5-6.4)    | 67.1<br>(53.7-81.6)                     | 14.3<br>(11.3-17.8)    | 382.2<br>(272.8 to 535.4)                       | 165.6<br>(95.4 to 259.2)  |
| <b>Brain and central nervous system cancer</b> | 8.4<br>(5.9-12.5)                       | 7.1<br>(5.4-9.8)    | 23.8<br>(14.9-31.5)                     | 23<br>(16.7-29.2)      | 182.3<br>(65.4 to 307.2)                        | 221.7<br>(80.9 to 365)    |
| <b>Breast cancer</b>                           | 0.4<br>(0.3-0.4)                        | 37.2<br>(31.2-43.7) | 5.2<br>(3.9-6.6)                        | 203.3<br>(163-252.6)   | 1336<br>(921.1 to 1910.1)                       | 447<br>(317.8 to 622)     |
| <b>Cervical cancer</b>                         | 0<br>(0-0)                              | 18.3<br>(14.6-29.9) | 0<br>(0-0)                              | 48.2<br>(26.7-61.1)    | 0<br>(0 to 0)                                   | 163<br>(13.3 to 282.5)    |
| <b>Colon and rectum cancer</b>                 | 38.2<br>(32-44.9)                       | 34.3<br>(28.9-39.8) | 290.7<br>(232.6-358.8)                  | 173.5<br>(141.1-212.6) | 660.7<br>(481.9 to 904)                         | 406.3<br>(295.1 to 552.3) |
| <b>Esophageal cancer</b>                       | 91.7<br>(60-110.5)                      | 51.8<br>(28.5-61.6) | 177.6<br>(131.2-219.9)                  | 64.9<br>(41.5-82.1)    | 93.6<br>(47.2 to 171.1)                         | 25.4<br>(-4.3 to 75.7)    |
| <b>Gallbladder and biliary tract cancer</b>    | 4.2<br>(3.3-7.3)                        | 5.5<br>(4.3-9.9)    | 16.5<br>(11-20.6)                       | 16.7<br>(10-21.8)      | 290.8<br>(82.4 to 489)                          | 203<br>(21.1 to 347.7)    |
| <b>Hodgkin lymphoma</b>                        | 1.6<br>(0.7-2.1)                        | 1<br>(0.5-1.4)      | 2.8<br>(1.8-3.7)                        | 1.5<br>(1-2)           | 78.8<br>(21.1 to 215.3)                         | 50.8<br>(5.8 to 157.8)    |
| <b>Kidney cancer</b>                           | 2.8<br>(2.2-3.5)                        | 2.2<br>(1.8-2.5)    | 24.6<br>(19.2-30.9)                     | 10.6<br>(8.6-13.2)     | 775.1<br>(526.9 to 1130.7)                      | 388.2<br>(276 to 531.9)   |
| <b>Larynx cancer</b>                           | 8.2<br>(6.8-9.7)                        | 2.4<br>(2-2.8)      | 31.6<br>(24.9-39.3)                     | 5.5<br>(4.4-6.7)       | 283.4<br>(188.5 to 419)                         | 131.3<br>(76.9 to 203.3)  |
| <b>Leukemia</b>                                | 9.8                                     | 8.7                 | 34.2                                    | 28.4                   | 249.2                                           | 224.9                     |

|                                   |              |             |               |              |                   |                  |
|-----------------------------------|--------------|-------------|---------------|--------------|-------------------|------------------|
|                                   | (7.7-12.7)   | (7.2-10.7)  | (25.6-43.6)   | (21.3-36.3)  | (145.8 to 386.9)  | (117.1 to 343.5) |
| <b>Lip and oral cavity cancer</b> | 4.4          | 3.1         | 25.1          | 8.5          | 467.1             | 172.2            |
|                                   | (3.6-5.2)    | (2.6-3.7)   | (19.7-31.1)   | (6.9-10.4)   | (316.2 to 690.3)  | (108.8 to 252.1) |
| <b>Liver cancer</b>               | 91.4         | 45.8        | 99.6          | 40.2         | 9                 | -12.3            |
|                                   | (73.3-113.3) | (37.7-56.5) | (79.7-123.3)  | (32.3-49.1)  | (-20.5 to 51.2)   | (-36.6 to 18.7)  |
| <b>Malignant skin melanoma</b>    | 0.8          | 0.9         | 4.1           | 4.8          | 399.4             | 422.9            |
|                                   | (0.5-1.2)    | (0.6-1.5)   | (2.4-6)       | (2.5-6.5)    | (220.5 to 614.6)  | (142.9 to 677.2) |
| <b>Mesothelioma</b>               | 0.3          | 0.4         | 1             | 0.8          | 246               | 102              |
|                                   | (0.2-0.4)    | (0.3-0.7)   | (0.8-1.3)     | (0.5-1.1)    | (108.6 to 396.7)  | (4 to 227.7)     |
| <b>Multiple myeloma</b>           | 2.2          | 2.4         | 8.6           | 6.1          | 294.7             | 152.7            |
|                                   | (1.7-3.3)    | (1.9-3.6)   | (5.8-11.6)    | (4.4-8)      | (100.6 to 467.4)  | (35.5 to 253.5)  |
| <b>Nasopharynx cancer</b>         | 9.7          | 5.4         | 35            | 12.4         | 259.9             | 131.2            |
|                                   | (7.9-11.5)   | (4.4-6.4)   | (27.1-44.5)   | (9.7-15.5)   | (165.5 to 391.9)  | (72 to 221.6)    |
| <b>Non-Hodgkin lymphoma</b>       | 4.8          | 3.6         | 39.8          | 21.8         | 728.6             | 497.7            |
|                                   | (3.9-5.8)    | (3.1-4.3)   | (31.5-49.7)   | (17.4-27)    | (522.4 to 1022.6) | (351.3 to 679.2) |
| <b>Non-melanoma skin cancer</b>   | 12.6         | 11.2        | 124.1         | 88.5         | 886.7             | 692.7            |
|                                   | (10.3-15.3)  | (9-13.9)    | (105.1-145.5) | (73.4-105.3) | (818.4 to 977.4)  | (644.4 to 763.1) |
| <b>Other malignant neoplasms</b>  | 14.8         | 11.7        | 81            | 45           | 445.6             | 283.9            |
|                                   | (11.7-18.2)  | (9.7-14)    | (60.5-101.5)  | (35.9-55.8)  | (280.3 to 658.6)  | (180.7 to 421.1) |
| <b>Other pharynx cancer</b>       | 1.5          | 0.6         | 5.3           | 1.8          | 252.2             | 201.6            |
|                                   | (1.3-1.8)    | (0.5-0.7)   | (4.2-6.7)     | (1.4-2.2)    | (160 to 372.5)    | (124.7 to 301.6) |
| <b>Ovarian cancer</b>             | 0            | 5.2         | 0             | 25.9         | 0                 | 394.9            |
|                                   | (0-0)        | (4-8.2)     | (0-0)         | (17.7-32.5)  | (0 to 0)          | (154.1 to 624.5) |
| <b>Pancreatic cancer</b>          | 11.4         | 8.6         | 55.3          | 39.3         | 385.4             | 359.1            |
|                                   | (9.3-13.7)   | (7.2-10)    | (44.1-67.7)   | (31.7-48.2)  | (259.7 to 565.4)  | (257.3 to 486.1) |
| <b>Prostate cancer</b>            | 24.9         | 0           | 145.5         | 0            | 483.9             | 0                |



|                                                |                                        |              |                                        |               |                                       |                  |
|------------------------------------------------|----------------------------------------|--------------|----------------------------------------|---------------|---------------------------------------|------------------|
|                                                | (19-30)                                | (0-0)        | (112.5-193.1)                          | (0-0)         | (335.6 to 704.4)                      | (0 to 0)         |
| <b>Stomach cancer</b>                          | 157.5                                  | 83.5         | 364.3                                  | 132.1         | 131.3                                 | 58.2             |
|                                                | (131.5-184.9)                          | (70.7-96.8)  | (290.3-446.6)                          | (107.6-161.7) | (75.3 to 204.5)                       | (22.3 to 101.4)  |
| <b>Testicular cancer</b>                       | 0.4                                    | 0            | 3.9                                    | 0             | 783.9                                 | 0                |
|                                                | (0.4-0.5)                              | (0-0)        | (2.9-4.9)                              | (0-0)         | (544.3 to 1101.9)                     | (0 to 0)         |
| <b>Thyroid cancer</b>                          | 1.1                                    | 2.6          | 7.3                                    | 10.3          | 554.9                                 | 287.8            |
|                                                | (0.9-1.4)                              | (2.2-3.5)    | (5.5-9.2)                              | (8-13.2)      | (339.5 to 812.8)                      | (183.4 to 434)   |
| <b>Tracheal, bronchus, and lung cancer</b>     | 138.4                                  | 59.3         | 502.2                                  | 219.6         | 262.9                                 | 270.4            |
|                                                | (113.2-164.7)                          | (49.8-69.7)  | (395.4-615.3)                          | (177.4-267.7) | (169.2 to 396.2)                      | (185.3 to 380.7) |
| <b>Uterine cancer</b>                          | 0                                      | 12.6         | 0                                      | 35.3          | 0                                     | 180              |
|                                                | (0-0)                                  | (9.9-15.4)   | (0-0)                                  | (27.4-51.3)   | (0 to 0)                              | (104.8 to 307)   |
| <b>Cause</b>                                   | <b>Incidence rate in 1990 (95% UI)</b> |              | <b>Incidence rate in 2019 (95% UI)</b> |               | <b>Annual rate of change (95% UI)</b> |                  |
|                                                | <b>Men</b>                             | <b>Women</b> | <b>Men</b>                             | <b>Women</b>  | <b>Men</b>                            | <b>Women</b>     |
| <b>Bladder cancer</b>                          | 19.6                                   | 7.3          | 39.3                                   | 7.9           | 1                                     | 0.08             |
|                                                | (16.5-22.9)                            | (6.1-8.7)    | (31.4-47.7)                            | (6.3-9.9)     | (0.55 to 1.64)                        | (-0.21 to 0.46)  |
| <b>Brain and central nervous system cancer</b> | 11.9                                   | 9.7          | 13.9                                   | 12.7          | 0.17                                  | 0.31             |
|                                                | (8.3-17.6)                             | (7.3-13.3)   | (8.7-18.4)                             | (9.2-16.2)    | (-0.31 to 0.69)                       | (-0.26 to 0.89)  |
| <b>Breast cancer</b>                           | 0.5                                    | 50.6         | 3                                      | 112.4         | 4.97                                  | 1.22             |
|                                                | (0.4-0.6)                              | (42.4-59.4)  | (2.3-3.9)                              | (90.1-139.7)  | (3.24 to 7.35)                        | (0.7 to 1.93)    |
| <b>Cervical cancer</b>                         | 0                                      | 24.9         | 0                                      | 26.6          | 0                                     | 0.07             |
|                                                | (0-0)                                  | (19.9-40.7)  | (0-0)                                  | (14.8-33.8)   | (0 to 0)                              | (-0.54 to 0.55)  |
| <b>Colon and rectum cancer</b>                 | 53.8                                   | 46.6         | 170.1                                  | 96            | 2.16                                  | 1.06             |
|                                                | (45.1-63.2)                            | (39.3-54.1)  | (136.1-209.9)                          | (78-117.6)    | (1.42 to 3.17)                        | (0.61 to 1.65)   |
| <b>Esophageal cancer</b>                       | 129.2                                  | 70.5         | 103.9                                  | 35.9          | -0.2                                  | -0.49            |
|                                                | (84.5-155.7)                           | (38.8-83.8)  | (76.8-128.7)                           | (22.9-45.4)   | (-0.39 to 0.13)                       | (-0.61 to -0.29) |

|                                             |                        |                     |                     |                     |                           |                           |
|---------------------------------------------|------------------------|---------------------|---------------------|---------------------|---------------------------|---------------------------|
| <b>Gallbladder and biliary tract cancer</b> | 5.9<br>(4.6-10.2)      | 7.5<br>(5.9-13.5)   | 9.6<br>(6.5-12.1)   | 9.2<br>(5.5-12.1)   | 0.62<br>(-0.24 to 1.45)   | 0.23<br>(-0.51 to 0.82)   |
| <b>Hodgkin lymphoma</b>                     | 2.2<br>(1-3)           | 1.4<br>(0.6-1.9)    | 1.7<br>(1-2.2)      | 0.9<br>(0.5-1.1)    | -0.26<br>(-0.5 to 0.31)   | -0.39<br>(-0.57 to 0.05)  |
| <b>Kidney cancer</b>                        | 4<br>(3.2-4.9)         | 3<br>(2.5-3.4)      | 14.4<br>(11.2-18.1) | 5.9<br>(4.7-7.3)    | 2.64<br>(1.6 to 4.11)     | 0.98<br>(0.53 to 1.57)    |
| <b>Larynx cancer</b>                        | 11.6<br>(9.5-13.7)     | 3.2<br>(2.7-3.8)    | 18.5<br>(14.5-23)   | 3.1<br>(2.4-3.7)    | 0.59<br>(0.2 to 1.16)     | -0.06<br>(-0.28 to 0.23)  |
| <b>Leukemia</b>                             | 13.8<br>(10.8-17.9)    | 11.9<br>(9.7-14.5)  | 20<br>(15-25.5)     | 15.7<br>(11.8-20.1) | 0.45<br>(0.02 to 1.02)    | 0.32<br>(-0.12 to 0.8)    |
| <b>Lip and oral cavity cancer</b>           | 6.2<br>(5.1-7.4)       | 4.2<br>(3.6-5)      | 14.7<br>(11.6-18.2) | 4.7<br>(3.8-5.7)    | 1.36<br>(0.73 to 2.28)    | 0.11<br>(-0.15 to 0.43)   |
| <b>Liver cancer</b>                         | 128.7<br>(103.3-159.6) | 62.4<br>(51.3-76.9) | 58.3<br>(46.6-72.1) | 22.2<br>(17.9-27.1) | -0.55<br>(-0.67 to -0.37) | -0.64<br>(-0.74 to -0.52) |
| <b>Malignant skin melanoma</b>              | 1.2<br>(0.7-1.7)       | 1.2<br>(0.8-2)      | 2.4<br>(1.4-3.5)    | 2.6<br>(1.4-3.6)    | 1.07<br>(0.33 to 1.97)    | 1.13<br>(-0.01 to 2.16)   |
| <b>Mesothelioma</b>                         | 0.4<br>(0.3-0.6)       | 0.6<br>(0.4-0.9)    | 0.6<br>(0.5-0.7)    | 0.5<br>(0.3-0.6)    | 0.44<br>(-0.13 to 1.06)   | -0.18<br>(-0.58 to 0.33)  |
| <b>Multiple myeloma</b>                     | 3.1<br>(2.3-4.6)       | 3.3<br>(2.5-4.9)    | 5.1<br>(3.4-6.8)    | 3.4<br>(2.4-4.4)    | 0.64<br>(-0.17 to 1.36)   | 0.03<br>(-0.45 to 0.44)   |
| <b>Nasopharynx cancer</b>                   | 13.7<br>(11.1-16.2)    | 7.3<br>(5.9-8.7)    | 20.5<br>(15.9-26)   | 6.8<br>(5.4-8.6)    | 0.5<br>(0.1 to 1.04)      | -0.06<br>(-0.3 to 0.31)   |
| <b>Non-Hodgkin lymphoma</b>                 | 6.8<br>(5.5-8.1)       | 5<br>(4.2-5.8)      | 23.3<br>(18.4-29.1) | 12<br>(9.6-14.9)    | 2.44<br>(1.59 to 3.66)    | 1.43<br>(0.83 to 2.17)    |
| <b>Non-melanoma skin cancer</b>             | 17.7<br>(14.5-21.6)    | 15.2<br>(12.3-18.9) | 72.6<br>(61.5-85.1) | 49<br>(40.6-58.2)   | 3.1<br>(2.82 to 3.48)     | 2.22<br>(2.03 to 2.51)    |

|                                            |                        |                       |                        |                     |                          |                          |
|--------------------------------------------|------------------------|-----------------------|------------------------|---------------------|--------------------------|--------------------------|
| <b>Other malignant neoplasms</b>           | 20.9<br>(16.5-25.7)    | 15.9<br>(13.2-19.1)   | 47.4<br>(35.4-59.4)    | 24.9<br>(19.8-30.9) | 1.27<br>(0.58 to 2.15)   | 0.56<br>(0.14 to 1.12)   |
| <b>Other pharynx cancer</b>                | 2.1<br>(1.8-2.5)       | 0.8<br>(0.7-0.9)      | 3.1<br>(2.5-3.9)       | 1<br>(0.8-1.2)      | 0.46<br>(0.08 to 0.96)   | 0.23<br>(-0.09 to 0.63)  |
| <b>Ovarian cancer</b>                      | 0<br>(0-0)             | 7.1<br>(5.5-11.2)     | 0<br>(0-0)             | 14.3<br>(9.8-18)    | 0<br>(0 to 0)            | 1.01<br>(0.03 to 1.95)   |
| <b>Pancreatic cancer</b>                   | 16.1<br>(13.1-19.2)    | 11.6<br>(9.9-13.5)    | 32.4<br>(25.8-39.6)    | 21.7<br>(17.5-26.6) | 1.02<br>(0.49 to 1.76)   | 0.87<br>(0.45 to 1.38)   |
| <b>Prostate cancer</b>                     | 35.1<br>(26.8-42.3)    | 0<br>(0-0)            | 85.1<br>(65.8-113)     | 0<br>(0-0)          | 1.43<br>(0.81 to 2.34)   | 0<br>(0 to 0)            |
| <b>Stomach cancer</b>                      | 221.9<br>(185.2-260.5) | 113.6<br>(96.2-131.7) | 213.2<br>(169.9-261.4) | 73.1<br>(59.5-89.4) | -0.04<br>(-0.27 to 0.26) | -0.36<br>(-0.5 to -0.18) |
| <b>Testicular cancer</b>                   | 0.6<br>(0.5-0.8)       | 0<br>(0-0)            | 2.3<br>(1.7-2.9)       | 0<br>(0-0)          | 2.67<br>(1.68 to 3.99)   | 0<br>(0 to 0)            |
| <b>Thyroid cancer</b>                      | 1.6<br>(1.3-2)         | 3.6<br>(2.9-4.8)      | 4.3<br>(3.2-5.4)       | 5.7<br>(4.4-7.3)    | 1.72<br>(0.83 to 2.79)   | 0.58<br>(0.15 to 1.17)   |
| <b>Tracheal, bronchus, and lung cancer</b> | 194.9<br>(159.4-232)   | 80.7<br>(67.7-94.8)   | 293.9<br>(231.4-360.1) | 121.5<br>(98.1-148) | 0.51<br>(0.12 to 1.06)   | 0.51<br>(0.16 to 0.95)   |
| <b>Uterine cancer</b>                      | 0<br>(0-0)             | 17.2<br>(13.5-21)     | 0<br>(0-0)             | 19.5<br>(15.2-28.4) | 0<br>(0 to 0)            | 0.14<br>(-0.17 to 0.65)  |

**Note:** Estimates are for populations aged 55 years and above among men and women in China. Rates are reported per 100000 person-years. Cancer types are listed alphabetically. Other malignant neoplasms are cancers without a detailed GBD cause separately listed. UI=uncertainty interval.

**Table S7** The DALYs and DALY rate in the risks for 20 cancers among men in 1990 and 2019, and percentage change in DALYs, annual rate of change in DALY rate from 1990 to 2019

| <b>Risks</b>                   | <b>DALYs in 1990<br/>(95% UI)</b> | <b>DALYs in 2019<br/>(95% UI)</b> | <b>Percentage<br/>change in DALYs<br/>(95% UI)</b> | <b>DALY rate in<br/>1990 (95% UI)</b> | <b>DALY rate in<br/>2019 (95% UI)</b> | <b>Annual rate of<br/>change in DALY<br/>rate (95% UI)</b> |
|--------------------------------|-----------------------------------|-----------------------------------|----------------------------------------------------|---------------------------------------|---------------------------------------|------------------------------------------------------------|
| <b>Bladder cancer</b>          |                                   |                                   |                                                    |                                       |                                       |                                                            |
| High fasting plasma glucose    | 12785<br>(1999-30191)             | 40055<br>(6568-92991)             | 213.3<br>(145.4 to 303.9)                          | 10.63<br>(1.66-25.09)                 | 12.69<br>(2.08-29.46)                 | 0.19<br>(-0.06 to 0.54)                                    |
| Smoking                        | 122824<br>(94629-150764)          | 311877<br>(231366-400449)         | 153.9<br>(94.4 to 232.9)                           | 102.08<br>(78.65-125.3)               | 98.79<br>(73.29-126.85)               | -0.03<br>(-0.26 to 0.27)                                   |
| <b>Breast cancer</b>           |                                   |                                   |                                                    |                                       |                                       |                                                            |
| Alcohol use                    | 860<br>(625-1139)                 | 7726<br>(5174-10433)              | 798.6<br>(509.8 to 1165.9)                         | 0.71<br>(0.52-0.95)                   | 2.45<br>(1.64-3.3)                    | 2.42<br>(1.32 to 3.82)                                     |
| Diet high in red meat          | 197<br>(65-298)                   | 2478<br>(1130-3746)               | 1157.8<br>(688.6 to 2219)                          | 0.16<br>(0.05-0.25)                   | 0.78<br>(0.36-1.19)                   | 3.79<br>(2.01 to 7.84)                                     |
| Secondhand smoke               | 125<br>(29-241)                   | 950<br>(215-1802)                 | 658.7<br>(385.6 to 1038.3)                         | 0.1<br>(0.02-0.2)                     | 0.3<br>(0.07-0.57)                    | 1.89<br>(0.85 to 3.34)                                     |
| <b>Colon and rectum cancer</b> |                                   |                                   |                                                    |                                       |                                       |                                                            |
| Alcohol use                    | 81231<br>(58152-107365)           | 384828<br>(261759-533541)         | 373.7<br>(247.1 to 560.3)                          | 67.51<br>(48.33-89.23)                | 121.9<br>(82.91-169)                  | 0.81<br>(0.32 to 1.52)                                     |
| Diet high in processed meat    | 4747<br>(2258-7768)               | 31742<br>(6869-59647)             | 568.7<br>(158.9 to 919.2)                          | 3.95<br>(1.88-6.46)                   | 10.05<br>(2.18-18.89)                 | 1.55<br>(-0.01 to 2.88)                                    |
| Diet high in red meat          | 23488<br>(3147-58861)             | 168658<br>(37465-335190)          | 618<br>(338 to 2185.7)                             | 19.52<br>(2.62-48.92)                 | 53.42<br>(11.87-106.17)               | 1.74<br>(0.67 to 7.71)                                     |
| Diet low in calcium            | 147725<br>(111107-196012)         | 440453<br>(292864-620833)         | 198.2<br>(113.8 to 311.4)                          | 122.78<br>(92.34-162.91)              | 139.52<br>(92.77-196.66)              | 0.14<br>(-0.19 to 0.57)                                    |

|                             |                           |                             |                           |                           |                           |                           |
|-----------------------------|---------------------------|-----------------------------|---------------------------|---------------------------|---------------------------|---------------------------|
| Diet low in fiber           | 13848<br>(5007-28646)     | 21819<br>(8815-51405)       | 57.6<br>(-12.6 to 176.8)  | 11.51<br>(4.16-23.81)     | 6.91<br>(2.79-16.28)      | -0.4<br>(-0.67 to 0.05)   |
| Diet low in milk            | 132517<br>(88231-179082)  | 535640<br>(346608-745316)   | 304.2<br>(207.7 to 430.1) | 110.14<br>(73.33-148.84)  | 169.67<br>(109.79-236.09) | 0.54<br>(0.17 to 1.02)    |
| Diet low in whole grains    | 107838<br>(39969-146808)  | 447158<br>(165154-626933)   | 314.7<br>(214.4 to 441.2) | 89.63<br>(33.22-122.02)   | 141.64<br>(52.31-198.59)  | 0.58<br>(0.2 to 1.06)     |
| High body-mass index        | 21741<br>(4540-52179)     | 195138<br>(73968-368477)    | 797.5<br>(500.2 to 1804)  | 18.07<br>(3.77-43.37)     | 61.81<br>(23.43-116.72)   | 2.42<br>(1.29 to 6.26)    |
| High fasting plasma glucose | 41691<br>(7177-100147)    | 204594<br>(36016-497947)    | 390.7<br>(277.9 to 545.3) | 34.65<br>(5.97-83.24)     | 64.81<br>(11.41-157.73)   | 0.87<br>(0.44 to 1.46)    |
| Low physical activity       | 21333<br>(4739-45421)     | 80062<br>(16765-174347)     | 275.3<br>(167.1 to 422)   | 17.73<br>(3.94-37.75)     | 25.36<br>(5.31-55.23)     | 0.43<br>(0.02 to 0.99)    |
| Smoking                     | 174956<br>(111017-240698) | 705341<br>(457502-1019230)  | 303.2<br>(200.3 to 442.4) | 145.41<br>(92.27-200.05)  | 223.42<br>(144.92-322.85) | 0.54<br>(0.14 to 1.07)    |
| <b>Esophageal cancer</b>    |                           |                             |                           |                           |                           |                           |
| Alcohol use                 | 591396<br>(363251-809072) | 1092482<br>(756484-1498491) | 84.7<br>(33.2 to 170.9)   | 491.53<br>(301.91-672.45) | 346.05<br>(239.62-474.66) | -0.3<br>(-0.49 to 0.03)   |
| Chewing tobacco             | 15395<br>(6999-27039)     | 27042<br>(12652-46830)      | 75.6<br>(3.3 to 205.6)    | 12.8<br>(5.82-22.47)      | 8.57<br>(4.01-14.83)      | -0.33<br>(-0.61 to 0.16)  |
| Diet low in fruits          | 373685<br>(109071-695450) | 264672<br>(38755-732741)    | -29.2<br>(-79.7 to 40.1)  | 310.58<br>(90.65-578.01)  | 83.84<br>(12.28-232.1)    | -0.73<br>(-0.92 to -0.47) |
| Diet low in vegetables      | 147774<br>(7113-319811)   | 13100<br>(6386-30768)       | -91.1<br>(-95.7 to 1.6)   | 122.82<br>(5.91-265.81)   | 4.15<br>(2.02-9.75)       | -0.97<br>(-0.98 to -0.61) |
| High body-mass index        | 142288<br>(13645-418724)  | 517607<br>(76076-1192708)   | 263.8<br>(130.4 to 766.1) | 118.26<br>(11.34-348.02)  | 163.96<br>(24.1-377.8)    | 0.39<br>(-0.12 to 2.3)    |
| Smoking                     | 1336236                   | 2172540                     | 62.6                      | 1110.59                   | 688.17                    | -0.38                     |

|                                             |                           |                           |                             |                          |                         |                           |
|---------------------------------------------|---------------------------|---------------------------|-----------------------------|--------------------------|-------------------------|---------------------------|
|                                             | (824908-1634936)          | (1638397-2754679)         | (22.2 to 132.8)             | (685.61-1358.85)         | (518.98-872.57)         | (-0.53 to -0.11)          |
| <b>Gallbladder and biliary tract cancer</b> |                           |                           |                             |                          |                         |                           |
| High body-mass index                        | 2619<br>(289-7900)        | 19075<br>(3144-44654)     | 628.4<br>(252.7 to 1610.4)  | 2.18<br>(0.24-6.57)      | 6.04<br>(1-14.14)       | 1.78<br>(0.34 to 5.52)    |
| Kidney cancer                               |                           |                           |                             |                          |                         |                           |
| High body-mass index                        | 2099<br>(423-5240)        | 26265<br>(9897-49318)     | 1151.1<br>(679.3 to 2726.2) | 1.74<br>(0.35-4.35)      | 8.32<br>(3.14-15.62)    | 3.77<br>(1.97 to 9.77)    |
| Occupational exposure to trichloroethylene  | 41<br>(9-79)              | 234<br>(49-454)           | 469.2<br>(289.6 to 706.3)   | 0.03<br>(0.01-0.07)      | 0.07<br>(0.02-0.14)     | 1.17<br>(0.48 to 2.07)    |
| Smoking                                     | 14495<br>(9362-20061)     | 82663<br>(55482-113955)   | 470.3<br>(296.1 to 722.1)   | 12.05<br>(7.78-16.67)    | 26.18<br>(17.57-36.1)   | 1.17<br>(0.51 to 2.13)    |
| <b>Larynx cancer</b>                        |                           |                           |                             |                          |                         |                           |
| Alcohol use                                 | 39170<br>(21689-57211)    | 87820<br>(50459-127306)   | 124.2<br>(61.6 to 221.3)    | 32.56<br>(18.03-47.55)   | 27.82<br>(15.98-40.33)  | -0.15<br>(-0.38 to 0.22)  |
| Occupational exposure to asbestos           | 991<br>(453-1871)         | 3180<br>(1448-5387)       | 221<br>(71.3 to 427.3)      | 0.82<br>(0.38-1.56)      | 1.01<br>(0.46-1.71)     | 0.22<br>(-0.35 to 1.01)   |
| Occupational exposure to sulfuric acid      | 6879<br>(2733-12964)      | 12432<br>(5078-24436)     | 80.7<br>(32.6 to 145.7)     | 5.72<br>(2.27-10.78)     | 3.94<br>(1.61-7.74)     | -0.31<br>(-0.49 to -0.06) |
| Smoking                                     | 140658<br>(113773-167707) | 277080<br>(217037-342169) | 97<br>(48.1 to 164.1)       | 116.91<br>(94.56-139.39) | 87.77<br>(68.75-108.39) | -0.25<br>(-0.44 to 0.01)  |
| <b>Leukemia</b>                             |                           |                           |                             |                          |                         |                           |
| High body-mass index                        | 3478<br>(658-8943)        | 15869<br>(5369-32183)     | 356.3<br>(194.2 to 907.9)   | 2.89<br>(0.55-7.43)      | 5.03<br>(1.7-10.19)     | 0.74<br>(0.12 to 2.84)    |
| Occupational exposure to benzene            | 662<br>(191-1162)         | 1392<br>(393-2457)        | 110.1<br>(50 to 194.6)      | 0.55<br>(0.16-0.97)      | 0.44<br>(0.12-0.78)     | -0.2<br>(-0.43 to 0.12)   |

|                                       |                           |                           |                           |                           |                           |                           |
|---------------------------------------|---------------------------|---------------------------|---------------------------|---------------------------|---------------------------|---------------------------|
| Occupational exposure to formaldehyde | 327<br>(202-493)          | 678<br>(406-1014)         | 107.2<br>(42.5 to 198.1)  | 0.27<br>(0.17-0.41)       | 0.21<br>(0.13-0.32)       | -0.21<br>(-0.46 to 0.14)  |
| Smoking                               | 97485<br>(58452-141406)   | 196096<br>(117789-282874) | 101.2<br>(35.6 to 186.8)  | 81.02<br>(48.58-117.53)   | 62.12<br>(37.31-89.6)     | -0.23<br>(-0.48 to 0.09)  |
| <b>Lip and oral cavity cancer</b>     |                           |                           |                           |                           |                           |                           |
| Alcohol use                           | 32961<br>(24583-42658)    | 153305<br>(112965-202117) | 365.1<br>(229.8 to 558.4) | 27.4<br>(20.43-35.45)     | 48.56<br>(35.78-64.02)    | 0.77<br>(0.26 to 1.51)    |
| Chewing tobacco                       | 657<br>(278-1214)         | 2963<br>(1322-5463)       | 351<br>(157.4 to 670.5)   | 0.55<br>(0.23-1.01)       | 0.94<br>(0.42-1.73)       | 0.72<br>(-0.02 to 1.94)   |
| Smoking                               | 44029<br>(34406-54095)    | 182540<br>(139677-231574) | 314.6<br>(201.2 to 474.2) | 36.59<br>(28.6-44.96)     | 57.82<br>(44.24-73.35)    | 0.58<br>(0.15 to 1.19)    |
| <b>Liver cancer</b>                   |                           |                           |                           |                           |                           |                           |
| Alcohol use                           | 253402<br>(162663-379907) | 262888<br>(176336-380940) | 3.7<br>(-24.7 to 47.7)    | 210.61<br>(135.19-315.75) | 83.27<br>(55.86-120.67)   | -0.6<br>(-0.71 to -0.44)  |
| Drug use                              | 247259<br>(187197-320162) | 251142<br>(184994-321942) | 1.6<br>(-26.5 to 40.9)    | 205.5<br>(155.59-266.1)   | 79.55<br>(58.6-101.98)    | -0.61<br>(-0.72 to -0.46) |
| High body-mass index                  | 112579<br>(18242-304688)  | 227927<br>(65438-500744)  | 102.5<br>(30 to 378.7)    | 93.57<br>(15.16-253.24)   | 72.2<br>(20.73-158.62)    | -0.23<br>(-0.5 to 0.82)   |
| High fasting plasma glucose           | 9213<br>(1738-23433)      | 11538<br>(2331-28976)     | 25.2<br>(-6.5 to 74)      | 7.66<br>(1.44-19.48)      | 3.65<br>(0.74-9.18)       | -0.52<br>(-0.64 to -0.34) |
| Smoking                               | 658948<br>(341393-997762) | 605053<br>(318983-907545) | -8.2<br>(-35.3 to 33.1)   | 547.67<br>(283.74-829.27) | 191.66<br>(101.04-287.47) | -0.65<br>(-0.75 to -0.49) |
| <b>Mesothelioma</b>                   |                           |                           |                           |                           |                           |                           |
| Occupational exposure to asbestos     | 5212<br>(3629-8485)       | 19522<br>(14901-25730)    | 274.6<br>(109.2 to 467.3) | 4.33<br>(3.02-7.05)       | 6.18<br>(4.72-8.15)       | 0.43<br>(-0.2 to 1.16)    |
| <b>Multiple myeloma</b>               |                           |                           |                           |                           |                           |                           |

|                                       |                          |                           |                            |                         |                          |                           |
|---------------------------------------|--------------------------|---------------------------|----------------------------|-------------------------|--------------------------|---------------------------|
| High body-mass index                  | 785<br>(109-2409)        | 5250<br>(1179-12774)      | 568.7<br>(247.8 to 1460)   | 0.65<br>(0.09-2)        | 1.66<br>(0.37-4.05)      | 1.55<br>(0.33 to 4.95)    |
| <b>Nasopharynx cancer</b>             |                          |                           |                            |                         |                          |                           |
| Alcohol use                           | 110939<br>(81222-144576) | 173953<br>(125976-225424) | 56.8<br>(13.9 to 115.2)    | 92.21<br>(67.51-120.16) | 55.1<br>(39.9-71.41)     | -0.4<br>(-0.57 to -0.18)  |
| Occupational exposure to formaldehyde | 1050<br>(369-2090)       | 1555<br>(646-2846)        | 48<br>(0.3 to 131.6)       | 0.87<br>(0.31-1.74)     | 0.49<br>(0.2-0.9)        | -0.44<br>(-0.62 to -0.12) |
| Smoking                               | 100824<br>(69968-134298) | 148473<br>(100701-203861) | 47.3<br>(7.5 to 101.9)     | 83.8<br>(58.15-111.62)  | 47.03<br>(31.9-64.57)    | -0.44<br>(-0.59 to -0.23) |
| <b>Non-Hodgkin lymphoma</b>           |                          |                           |                            |                         |                          |                           |
| High body-mass index                  | 2002<br>(331-5568)       | 18459<br>(5351-41482)     | 822.2<br>(515.5 to 1906.1) | 1.66<br>(0.28-4.63)     | 5.85<br>(1.69-13.14)     | 2.51<br>(1.35 to 6.65)    |
| Other pharynx cancer                  |                          |                           |                            |                         |                          |                           |
| Alcohol use                           | 15930<br>(11758-20481)   | 40742<br>(28741-53770)    | 155.8<br>(79.3 to 257.5)   | 13.24<br>(9.77-17.02)   | 12.91<br>(9.1-17.03)     | -0.03<br>(-0.32 to 0.36)  |
| Smoking                               | 24756<br>(20227-29911)   | 56918<br>(43444-72058)    | 129.9<br>(65.5 to 212.9)   | 20.58<br>(16.81-24.86)  | 18.03<br>(13.76-22.83)   | -0.12<br>(-0.37 to 0.19)  |
| <b>Pancreatic cancer</b>              |                          |                           |                            |                         |                          |                           |
| High body-mass index                  | 3814<br>(-11-12755)      | 37427<br>(-168-103303)    | 881.4<br>(553.6 to 2039.1) | 3.17<br>(-0.01-10.6)    | 11.86<br>(-0.05-32.72)   | 2.74<br>(1.49 to 7.15)    |
| High fasting plasma glucose           | 16362<br>(2865-40678)    | 86759<br>(14902-212154)   | 430.3<br>(277.5 to 643.6)  | 13.6<br>(2.38-33.81)    | 27.48<br>(4.72-67.2)     | 1.02<br>(0.44 to 1.83)    |
| Smoking                               | 91458<br>(70475-115296)  | 408066<br>(304888-529984) | 346.2<br>(217 to 521.6)    | 76.01<br>(58.57-95.83)  | 129.26<br>(96.58-167.88) | 0.7<br>(0.21 to 1.37)     |
| <b>Prostate cancer</b>                |                          |                           |                            |                         |                          |                           |
| Smoking                               | 38000                    | 92885                     | 144.4                      | 31.58                   | 29.42                    | -0.07                     |



|                                            |                             |                              |                            |                            |                           |                           |
|--------------------------------------------|-----------------------------|------------------------------|----------------------------|----------------------------|---------------------------|---------------------------|
|                                            | (17933-59320)               | (43248-149606)               | (80.2 to 246.7)            | (14.9-49.3)                | (13.7-47.39)              | (-0.31 to 0.32)           |
| <b>Stomach cancer</b>                      |                             |                              |                            |                            |                           |                           |
| Diet high in sodium                        | 323860<br>(7020-1200356)    | 472380<br>(10125-1762868)    | 45.9<br>(7.6 to 92.4)      | 269.17<br>(5.83-997.66)    | 149.63<br>(3.21-558.41)   | -0.44<br>(-0.59 to -0.27) |
| Smoking                                    | 1090487<br>(812207-1389365) | 1667273<br>(1233666-2126949) | 52.9<br>(13.7 to 107.5)    | 906.34<br>(675.05-1154.75) | 528.13<br>(390.78-673.73) | -0.42<br>(-0.57 to -0.21) |
| <b>Thyroid cancer</b>                      |                             |                              |                            |                            |                           |                           |
| High body-mass index                       | 717<br>(97-2082)            | 5479<br>(1332-12724)         | 664<br>(380.3 to 1636.9)   | 0.6<br>(0.08-1.73)         | 1.74<br>(0.42-4.03)       | 1.91<br>(0.83 to 5.62)    |
| <b>Tracheal, bronchus, and lung cancer</b> |                             |                              |                            |                            |                           |                           |
| Ambient particulate matter pollution       | 381671<br>(167324-658312)   | 2180066<br>(1473769-3001692) | 471.2<br>(211.5 to 1133.5) | 317.22<br>(139.07-547.14)  | 690.56<br>(466.83-950.82) | 1.18<br>(0.19 to 3.7)     |
| Diet low in fruits                         | 169386<br>(54712-270628)    | 335828<br>(86434-561374)     | 98.3<br>(20.6 to 199.4)    | 140.78<br>(45.47-224.93)   | 106.38<br>(27.38-177.82)  | -0.24<br>(-0.54 to 0.14)  |
| High fasting plasma glucose                | 192980<br>(30451-475096)    | 679282<br>(112979-1668784)   | 252<br>(150.1 to 383.7)    | 160.39<br>(25.31-394.87)   | 215.17<br>(35.79-528.6)   | 0.34<br>(-0.05 to 0.84)   |
| Household air pollution from solid fuels   | 690623<br>(410995-1021762)  | 416438<br>(181330-791662)    | -39.7<br>(-70.4 to 6.9)    | 574<br>(341.59-849.22)     | 131.91<br>(57.44-250.77)  | -0.77<br>(-0.89 to -0.59) |
| Occupational exposure to arsenic           | 19466<br>(6908-32716)       | 51070<br>(17669-86895)       | 162.4<br>(82.7 to 265.2)   | 16.18<br>(5.74-27.19)      | 16.18<br>(5.6-27.52)      | 0<br>(-0.3 to 0.39)       |
| Occupational exposure to asbestos          | 61913<br>(31524-111419)     | 286422<br>(152526-479704)    | 362.6<br>(163.3 to 670.7)  | 51.46<br>(26.2-92.6)       | 90.73<br>(48.31-151.95)   | 0.76<br>(0 to 1.94)       |
| Occupational exposure to beryllium         | 847<br>(553-1184)           | 2053<br>(1364-2916)          | 142.2<br>(68.7 to 241.3)   | 0.7<br>(0.46-0.98)         | 0.65<br>(0.43-0.92)       | -0.08<br>(-0.36 to 0.3)   |

|                                                           |                              |                              |                           |                              |                              |                          |
|-----------------------------------------------------------|------------------------------|------------------------------|---------------------------|------------------------------|------------------------------|--------------------------|
| Occupational exposure to cadmium                          | 1907<br>(1275-2619)          | 4991<br>(3315-6768)          | 161.8<br>(84.1 to 269.3)  | 1.58<br>(1.06-2.18)          | 1.58<br>(1.05-2.14)          | 0<br>(-0.3 to 0.41)      |
| Occupational exposure to chromium                         | 3648<br>(2758-4769)          | 10177<br>(7339-13809)        | 179<br>(94.3 to 294.4)    | 3.03<br>(2.29-3.96)          | 3.22<br>(2.32-4.37)          | 0.06<br>(-0.26 to 0.5)   |
| Occupational exposure to diesel engine exhaust            | 43884<br>(31291-57907)       | 127417<br>(92744-170193)     | 190.3<br>(107.9 to 313.1) | 36.47<br>(26.01-48.13)       | 40.36<br>(29.38-53.91)       | 0.11<br>(-0.21 to 0.57)  |
| Occupational exposure to nickel                           | 22101<br>(4462-50543)        | 53200<br>(11065-123474)      | 140.7<br>(69 to 237.7)    | 18.37<br>(3.71-42.01)        | 16.85<br>(3.51-39.11)        | -0.08<br>(-0.36 to 0.29) |
| Occupational exposure to polycyclic aromatic hydrocarbons | 12723<br>(8783-17092)        | 35165<br>(24148-48804)       | 176.4<br>(94.7 to 290.9)  | 10.57<br>(7.3-14.21)         | 11.14<br>(7.65-15.46)        | 0.05<br>(-0.26 to 0.49)  |
| Occupational exposure to silica                           | 114187<br>(51492-184253)     | 277535<br>(121372-453653)    | 143.1<br>(71.3 to 240.7)  | 94.9<br>(42.8-153.14)        | 87.91<br>(38.45-143.7)       | -0.07<br>(-0.35 to 0.3)  |
| Residential radon                                         | 122988<br>(22311-259016)     | 354507<br>(65690-758704)     | 188.2<br>(104.3 to 298.5) | 102.22<br>(18.54-215.28)     | 112.29<br>(20.81-240.33)     | 0.1<br>(-0.22 to 0.52)   |
| Secondhand smoke                                          | 200864<br>(114960-311402)    | 588279<br>(333552-919162)    | 192.9<br>(101.3 to 337)   | 166.94<br>(95.55-258.82)     | 186.34<br>(105.66-291.15)    | 0.12<br>(-0.23 to 0.67)  |
| Smoking                                                   | 2696387<br>(2205582-3230714) | 7948174<br>(6222560-9896890) | 194.8<br>(111 to 300.6)   | 2241.05<br>(1833.13-2685.15) | 2517.66<br>(1971.06-3134.94) | 0.12<br>(-0.2 to 0.53)   |

**Note:** Estimates are for populations aged 55 years and above among men in China. Rates are reported per 100000 person-years. Cancer types and risks are listed alphabetically. DALY=disability-adjusted life-year, UI=uncertainty interval.

**Table S8** The DALYs and DALY rate in the risks for 22 cancers among women in 1990 and 2019, and percentage change in DALYs, annual rate of change in DALY rate from 1990 to 2019

| <b>Risks</b>                | <b>DALYs in 1990<br/>(95% UI)</b> | <b>DALYs in 2019<br/>(95% UI)</b> | <b>Percentage change<br/>in DALYs (95%<br/>UI)</b> | <b>DALY rate in<br/>1990 (95% UI)</b> | <b>DALY rate in<br/>2019 (95% UI)</b> | <b>Annual rate of<br/>change in DALY<br/>rate (95% UI)</b> |
|-----------------------------|-----------------------------------|-----------------------------------|----------------------------------------------------|---------------------------------------|---------------------------------------|------------------------------------------------------------|
| <b>Bladder cancer</b>       |                                   |                                   |                                                    |                                       |                                       |                                                            |
| High fasting plasma glucose | 5860<br>(1037-14513)              | 9806<br>(1662-23194)              | 67.4<br>(25 to 125.5)                              | 4.31<br>(0.76-10.67)                  | 2.78<br>(0.47-6.58)                   | -0.35<br>(-0.52 to -0.13)                                  |
| Smoking                     | 13736<br>(8280-19353)             | 17326<br>(10620-25194)            | 26.1<br>(-13.5 to 85.2)                            | 10.1<br>(6.09-14.22)                  | 4.91<br>(3.01-7.14)                   | -0.51<br>(-0.67 to -0.29)                                  |
| <b>Breast cancer</b>        |                                   |                                   |                                                    |                                       |                                       |                                                            |
| Alcohol use                 | 12246<br>(8470-16684)             | 37690<br>(25098-51911)            | 207.8<br>(103.5 to 381.2)                          | 9<br>(6.22-12.26)                     | 10.69<br>(7.12-14.72)                 | 0.19<br>(-0.21 to 0.86)                                    |
| Diet high in red meat       | 17642<br>(6066-26732)             | 72606<br>(32899-105424)           | 311.6<br>(182.3 to 627.9)                          | 12.97<br>(4.46-19.65)                 | 20.59<br>(9.33-29.9)                  | 0.59<br>(0.09 to 1.81)                                     |
| High body-mass index        | 45198<br>(8115-109612)            | 251768<br>(71756-507947)          | 457<br>(281.1 to 980.7)                            | 33.22<br>(5.96-80.56)                 | 71.4<br>(20.35-144.05)                | 1.15<br>(0.47 to 3.17)                                     |
| High fasting plasma glucose | 35926<br>(6796-82776)             | 105013<br>(19529-245563)          | 192.3<br>(128.8 to 282.6)                          | 26.4<br>(4.99-60.84)                  | 29.78<br>(5.54-69.64)                 | 0.13<br>(-0.12 to 0.48)                                    |
| Low physical activity       | 5676<br>(2664-10469)              | 14486<br>(7094-26678)             | 155.2<br>(91.1 to 243.5)                           | 4.17<br>(1.96-7.69)                   | 4.11<br>(2.01-7.57)                   | -0.02<br>(-0.26 to 0.33)                                   |
| Secondhand smoke            | 24421<br>(5783-42570)             | 57265<br>(14064-101864)           | 134.5<br>(79.6 to 209.9)                           | 17.95<br>(4.25-31.29)                 | 16.24<br>(3.99-28.89)                 | -0.1<br>(-0.31 to 0.2)                                     |
| Smoking                     | 6482<br>(3846-10226)              | 21890<br>(14521-31417)            | 237.7<br>(121.4 to 426.6)                          | 4.76<br>(2.83-7.52)                   | 6.21<br>(4.12-8.91)                   | 0.3<br>(-0.15 to 1.03)                                     |
| <b>Cervical cancer</b>      |                                   |                                   |                                                    |                                       |                                       |                                                            |

|                                |                           |                            |                            |                           |                           |                           |
|--------------------------------|---------------------------|----------------------------|----------------------------|---------------------------|---------------------------|---------------------------|
| Smoking                        | 58307<br>(25478-112250)   | 94995<br>(36983-178480)    | 62.9<br>(-30.4 to 160.1)   | 42.85<br>(18.72-82.5)     | 26.94<br>(10.49-50.61)    | -0.37<br>(-0.73 to 0)     |
| Unsafe sex                     | 384588<br>(303304-616502) | 804412<br>(461315-1026731) | 109.2<br>(-9.7 to 201.8)   | 282.65<br>(222.91-453.09) | 228.12<br>(130.82-291.17) | -0.19<br>(-0.65 to 0.16)  |
| <b>Colon and rectum cancer</b> |                           |                            |                            |                           |                           |                           |
| Alcohol use                    | 9633<br>(6104-13856)      | 32560<br>(20341-48407)     | 238<br>(116.5 to 430.2)    | 7.08<br>(4.49-10.18)      | 9.23<br>(5.77-13.73)      | 0.3<br>(-0.16 to 1.05)    |
| Diet high in processed meat    | 4447<br>(1842-7577)       | 21071<br>(3785-39718)      | 373.8<br>(76.7 to 604.5)   | 3.27<br>(1.35-5.57)       | 5.98<br>(1.07-11.26)      | 0.83<br>(-0.32 to 1.72)   |
| Diet high in red meat          | 20061<br>(2485-49370)     | 95722<br>(25060-189500)    | 377.2<br>(201.3 to 1615.5) | 14.74<br>(1.83-36.28)     | 27.15<br>(7.11-53.74)     | 0.84<br>(0.16 to 5.62)    |
| Diet low in calcium            | 120042<br>(89928-154963)  | 230631<br>(145366-338790)  | 92.1<br>(40.7 to 159.5)    | 88.22<br>(66.09-113.89)   | 65.4<br>(41.22-96.08)     | -0.26<br>(-0.46 to 0)     |
| Diet low in fiber              | 13498<br>(4824-27058)     | 14991<br>(5716-36734)      | 11.1<br>(-37.1 to 84)      | 9.92<br>(3.55-19.89)      | 4.25<br>(1.62-10.42)      | -0.57<br>(-0.76 to -0.29) |
| Diet low in milk               | 115537<br>(77358-155871)  | 309776<br>(201432-419041)  | 168.1<br>(111.3 to 246.9)  | 84.91<br>(56.85-114.56)   | 87.85<br>(57.12-118.84)   | 0.03<br>(-0.18 to 0.34)   |
| Diet low in whole grains       | 92154<br>(34163-125925)   | 253611<br>(94050-354702)   | 175.2<br>(114.1 to 255.9)  | 67.73<br>(25.11-92.55)    | 71.92<br>(26.67-100.59)   | 0.06<br>(-0.17 to 0.37)   |
| High body-mass index           | 8267<br>(1831-21529)      | 46479<br>(16035-100750)    | 462.3<br>(297.7 to 955.4)  | 6.08<br>(1.35-15.82)      | 13.18<br>(4.55-28.57)     | 1.17<br>(0.53 to 3.07)    |
| High fasting plasma glucose    | 39887<br>(7361-96438)     | 115159<br>(20783-275751)   | 188.7<br>(126.7 to 274.1)  | 29.31<br>(5.41-70.88)     | 32.66<br>(5.89-78.2)      | 0.11<br>(-0.13 to 0.44)   |
| Low physical activity          | 28485<br>(7496-55781)     | 74070<br>(20115-149763)    | 160<br>(91.6 to 257.4)     | 20.93<br>(5.51-41)        | 21.01<br>(5.7-42.47)      | 0<br>(-0.26 to 0.38)      |

|                                             |                          |                          |                           |                          |                        |                           |
|---------------------------------------------|--------------------------|--------------------------|---------------------------|--------------------------|------------------------|---------------------------|
| Smoking                                     | 14337<br>(5822-23320)    | 49544<br>(25306-75593)   | 245.6<br>(131.6 to 436.9) | 10.54<br>(4.28-17.14)    | 14.05<br>(7.18-21.44)  | 0.33<br>(-0.11 to 1.07)   |
| <b>Esophageal cancer</b>                    |                          |                          |                           |                          |                        |                           |
| Alcohol use                                 | 46714<br>(23965-74697)   | 53375<br>(28557-83085)   | 14.3<br>(-26.7 to 90.7)   | 34.33<br>(17.61-54.9)    | 15.14<br>(8.1-23.56)   | -0.56<br>(-0.72 to -0.26) |
| Chewing tobacco                             | 3258<br>(1276-6035)      | 2848<br>(1301-5421)      | -12.6<br>(-54 to 67.4)    | 2.39<br>(0.94-4.44)      | 0.81<br>(0.37-1.54)    | -0.66<br>(-0.82 to -0.35) |
| Diet low in fruits                          | 200682<br>(61444-376873) | 70558<br>(9637-192153)   | -64.8<br>(-90.6 to -30.3) | 147.49<br>(45.16-276.98) | 20.01<br>(2.73-54.49)  | -0.86<br>(-0.96 to -0.73) |
| Diet low in vegetables                      | 73780<br>(3702-164171)   | 3781<br>(1780-8758)      | -94.9<br>(-97.3 to -43.5) | 54.22<br>(2.72-120.65)   | 1.07<br>(0.5-2.48)     | -0.98<br>(-0.99 to -0.78) |
| High body-mass index                        | 84085<br>(3491-264583)   | 151147<br>(7650-377110)  | 79.8<br>(22.7 to 268.5)   | 61.8<br>(2.57-194.45)    | 42.86<br>(2.17-106.94) | -0.31<br>(-0.53 to 0.42)  |
| Smoking                                     | 119549<br>(66781-163972) | 100317<br>(68281-136958) | -16.1<br>(-43.6 to 31.9)  | 87.86<br>(49.08-120.51)  | 28.45<br>(19.36-38.84) | -0.68<br>(-0.78 to -0.49) |
| <b>Gallbladder and biliary tract cancer</b> |                          |                          |                           |                          |                        |                           |
| High body-mass index                        | 8484<br>(2015-21546)     | 43353<br>(16688-84713)   | 411<br>(107.3 to 1017.7)  | 6.24<br>(1.48-15.84)     | 12.29<br>(4.73-24.02)  | 0.97<br>(-0.2 to 3.31)    |
| <b>Kidney cancer</b>                        |                          |                          |                           |                          |                        |                           |
| High body-mass index                        | 2561<br>(650-5701)       | 17222<br>(7325-31363)    | 572.5<br>(365.7 to 1219)  | 1.88<br>(0.48-4.19)      | 4.88<br>(2.08-8.89)    | 1.59<br>(0.8 to 4.09)     |
| Occupational exposure to trichloroethylene  | 30<br>(6-58)             | 116<br>(24-216)          | 289.3<br>(194 to 420)     | 0.02<br>(0-0.04)         | 0.03<br>(0.01-0.06)    | 0.5<br>(0.13 to 1.01)     |
| Smoking                                     | 1035<br>(510-1723)       | 4758<br>(2744-7095)      | 359.6<br>(209.7 to 618.9) | 0.76<br>(0.37-1.27)      | 1.35<br>(0.78-2.01)    | 0.77<br>(0.19 to 1.77)    |
| <b>Larynx cancer</b>                        |                          |                          |                           |                          |                        |                           |

|                                        |                        |                        |                          |                       |                      |                           |
|----------------------------------------|------------------------|------------------------|--------------------------|-----------------------|----------------------|---------------------------|
| Alcohol use                            | 1449<br>(507-2614)     | 2467<br>(1056-4162)    | 70.3<br>(7.9 to 203.8)   | 1.06<br>(0.37-1.92)   | 0.7<br>(0.3-1.18)    | -0.34<br>(-0.58 to 0.17)  |
| Occupational exposure to asbestos      | 502<br>(205-1000)      | 642<br>(257-1120)      | 27.8<br>(-42.3 to 135.7) | 0.37<br>(0.15-0.74)   | 0.18<br>(0.07-0.32)  | -0.51<br>(-0.78 to -0.09) |
| Occupational exposure to sulfuric acid | 1903<br>(753-3539)     | 2563<br>(1058-4954)    | 34.7<br>(2.9 to 78.5)    | 1.4<br>(0.55-2.6)     | 0.73<br>(0.3-1.4)    | -0.48<br>(-0.6 to -0.31)  |
| Smoking                                | 14957<br>(10429-19654) | 17728<br>(11692-24381) | 18.5<br>(-14.8 to 66.2)  | 10.99<br>(7.66-14.44) | 5.03<br>(3.32-6.91)  | -0.54<br>(-0.67 to -0.36) |
| <b>Leukemia</b>                        |                        |                        |                          |                       |                      |                           |
| High body-mass index                   | 5855<br>(1095-15482)   | 21390<br>(6365-45642)  | 265.3<br>(142.9 to 643)  | 4.3<br>(0.8-11.38)    | 6.07<br>(1.81-12.94) | 0.41<br>(-0.06 to 1.87)   |
| Occupational exposure to benzene       | 472<br>(138-811)       | 1135<br>(307-2017)     | 140.5<br>(61.6 to 230.6) | 0.35<br>(0.1-0.6)     | 0.32<br>(0.09-0.57)  | -0.07<br>(-0.38 to 0.28)  |
| Occupational exposure to formaldehyde  | 240<br>(148-357)       | 500<br>(306-755)       | 108.3<br>(39.5 to 198.7) | 0.18<br>(0.11-0.26)   | 0.14<br>(0.09-0.21)  | -0.2<br>(-0.46 to 0.15)   |
| Smoking                                | 9569<br>(3479-18881)   | 20455<br>(9210-37230)  | 113.8<br>(29.8 to 265.6) | 7.03<br>(2.56-13.88)  | 5.8<br>(2.61-10.56)  | -0.18<br>(-0.5 to 0.41)   |
| <b>Lip and oral cavity cancer</b>      |                        |                        |                          |                       |                      |                           |
| Alcohol use                            | 3505<br>(2080-5193)    | 8713<br>(5341-13251)   | 148.6<br>(56.8 to 295.2) | 2.58<br>(1.53-3.82)   | 2.47<br>(1.51-3.76)  | -0.04<br>(-0.39 to 0.52)  |
| Chewing tobacco                        | 548<br>(272-982)       | 1029<br>(529-1781)     | 87.7<br>(3.2 to 234.9)   | 0.4<br>(0.2-0.72)     | 0.29<br>(0.15-0.51)  | -0.28<br>(-0.6 to 0.29)   |
| Smoking                                | 3569<br>(2163-5365)    | 8470<br>(5732-11808)   | 137.3<br>(61.8 to 254.7) | 2.62<br>(1.59-3.94)   | 2.4<br>(1.63-3.35)   | -0.08<br>(-0.38 to 0.37)  |
| <b>Liver cancer</b>                    |                        |                        |                          |                       |                      |                           |
| Alcohol use                            | 102115                 | 90505                  | -11.4                    | 75.05                 | 25.67                | -0.66                     |

|                                       |                 |                 |                  |                |               |                  |
|---------------------------------------|-----------------|-----------------|------------------|----------------|---------------|------------------|
|                                       | (69886-144015)  | (61938-124562)  | (-36.3 to 22.1)  | (51.36-105.84) | (17.56-35.32) | (-0.75 to -0.53) |
| Drug use                              | 201174          | 195955          | -2.6             | 147.85         | 55.57         | -0.62            |
|                                       | (118494-306314) | (129599-275936) | (-34.3 to 48.2)  | (87.09-225.12) | (36.75-78.25) | (-0.75 to -0.43) |
| High body-mass index                  | 39829           | 62438           | 56.8             | 29.27          | 17.71         | -0.4             |
|                                       | (4207-117330)   | (9252-154761)   | (3.1 to 223.4)   | (3.09-86.23)   | (2.62-43.89)  | (-0.6 to 0.25)   |
| High fasting plasma glucose           | 11363           | 10165           | -10.5            | 8.35           | 2.88          | -0.65            |
|                                       | (1989-27673)    | (1897-24237)    | (-35.3 to 24.1)  | (1.46-20.34)   | (0.54-6.87)   | (-0.75 to -0.52) |
| Smoking                               | 28565           | 29088           | 1.8              | 20.99          | 8.25          | -0.61            |
|                                       | (10394-52062)   | (12551-47282)   | (-36.8 to 73.5)  | (7.64-38.26)   | (3.56-13.41)  | (-0.76 to -0.33) |
| <b>Mesothelioma</b>                   |                 |                 |                  |                |               |                  |
| Occupational exposure to asbestos     | 8672            | 16179           | 86.6             | 6.37           | 4.59          | -0.28            |
|                                       | (5674-14415)    | (9492-21486)    | (-10.9 to 223.6) | (4.17-10.59)   | (2.69-6.09)   | (-0.66 to 0.25)  |
| <b>Multiple myeloma</b>               |                 |                 |                  |                |               |                  |
| High body-mass index                  | 1098            | 4809            | 337.9            | 0.81           | 1.36          | 0.69             |
|                                       | (189-2997)      | (1260-11097)    | (141.6 to 797.4) | (0.14-2.2)     | (0.36-3.15)   | (-0.07 to 2.46)  |
| <b>Nasopharynx cancer</b>             |                 |                 |                  |                |               |                  |
| Alcohol use                           | 12761           | 14925           | 17               | 9.38           | 4.23          | -0.55            |
|                                       | (6842-20026)    | (8593-22416)    | (-26.1 to 87.1)  | (5.03-14.72)   | (2.44-6.36)   | (-0.71 to -0.28) |
| Occupational exposure to formaldehyde | 440             | 526             | 19.6             | 0.32           | 0.15          | -0.54            |
|                                       | (170-835)       | (214-955)       | (-14.2 to 77.8)  | (0.12-0.61)    | (0.06-0.27)   | (-0.67 to -0.31) |
| Smoking                               | 4829            | 5358            | 11               | 3.55           | 1.52          | -0.57            |
|                                       | (2574-7857)     | (3042-8253)     | (-29.1 to 80.3)  | (1.89-5.77)    | (0.86-2.34)   | (-0.73 to -0.3)  |
| <b>Non-Hodgkin lymphoma</b>           |                 |                 |                  |                |               |                  |
| High body-mass index                  | 1376            | 8595            | 524.8            | 1.01           | 2.44          | 1.41             |
|                                       | (178-3922)      | (1308-20602)    | (333 to 1104.1)  | (0.13-2.88)    | (0.37-5.84)   | (0.67 to 3.65)   |
| Other pharynx cancer                  |                 |                 |                  |                |               |                  |

|                                   |                         |                         |                            |                         |                        |                           |
|-----------------------------------|-------------------------|-------------------------|----------------------------|-------------------------|------------------------|---------------------------|
| Alcohol use                       | 1075<br>(596-1634)      | 1807<br>(1042-2729)     | 68.1<br>(5.3 to 174.9)     | 0.79<br>(0.44-1.2)      | 0.51<br>(0.3-0.77)     | -0.35<br>(-0.59 to 0.06)  |
| Smoking                           | 1603<br>(1039-2343)     | 2662<br>(1885-3640)     | 66<br>(11.7 to 156.3)      | 1.18<br>(0.76-1.72)     | 0.75<br>(0.53-1.03)    | -0.36<br>(-0.57 to -0.01) |
| <b>Ovarian cancer</b>             |                         |                         |                            |                         |                        |                           |
| High body-mass index              | 1081<br>(-27-3414)      | 9968<br>(-234-26312)    | 821.8<br>(381 to 1828.6)   | 0.79<br>(-0.02-2.51)    | 2.83<br>(-0.07-7.46)   | 2.56<br>(0.86 to 6.44)    |
| High fasting plasma glucose       | 7168<br>(1271-19123)    | 33244<br>(5664-83014)   | 363.8<br>(138.3 to 582.1)  | 5.27<br>(0.93-14.05)    | 9.43<br>(1.61-23.54)   | 0.79<br>(-0.08 to 1.63)   |
| Occupational exposure to asbestos | 2067<br>(855-4785)      | 7236<br>(2514-13153)    | 250.1<br>(7.5 to 619.5)    | 1.52<br>(0.63-3.52)     | 2.05<br>(0.71-3.73)    | 0.35<br>(-0.59 to 1.78)   |
| <b>Pancreatic cancer</b>          |                         |                         |                            |                         |                        |                           |
| High body-mass index              | 4368<br>(850-10629)     | 37794<br>(10790-80752)  | 765.2<br>(499.8 to 1545.5) | 3.21<br>(0.62-7.81)     | 10.72<br>(3.06-22.9)   | 2.34<br>(1.31 to 5.35)    |
| High fasting plasma glucose       | 12969<br>(2040-31223)   | 57573<br>(8932-140458)  | 343.9<br>(243.7 to 471.5)  | 9.53<br>(1.5-22.95)     | 16.33<br>(2.53-39.83)  | 0.71<br>(0.33 to 1.21)    |
| Smoking                           | 13135<br>(8676-18774)   | 69574<br>(49681-92557)  | 429.7<br>(260.4 to 706.4)  | 9.65<br>(6.38-13.8)     | 19.73<br>(14.09-26.25) | 1.04<br>(0.39 to 2.11)    |
| <b>Stomach cancer</b>             |                         |                         |                            |                         |                        |                           |
| Diet high in sodium               | 161143<br>(3681-602200) | 176037<br>(3905-682994) | 9.2<br>(-18.1 to 39.6)     | 118.43<br>(2.71-442.58) | 49.92<br>(1.11-193.69) | -0.58<br>(-0.68 to -0.46) |
| Smoking                           | 47672<br>(28311-71711)  | 67339<br>(45486-94007)  | 41.3<br>(-6.3 to 113.9)    | 35.04<br>(20.81-52.7)   | 19.1<br>(12.9-26.66)   | -0.45<br>(-0.64 to -0.17) |
| <b>Thyroid cancer</b>             |                         |                         |                            |                         |                        |                           |
| High body-mass index              | 991<br>(232-2388)       | 3504<br>(1381-7012)     | 253.5<br>(138.8 to 592.9)  | 0.73<br>(0.17-1.75)     | 0.99<br>(0.39-1.99)    | 0.36<br>(-0.08 to 1.67)   |



**Tracheal, bronchus, and lung cancer**

|                                                |                           |                            |                            |                          |                          |                           |
|------------------------------------------------|---------------------------|----------------------------|----------------------------|--------------------------|--------------------------|---------------------------|
| Ambient particulate matter pollution           | 123445<br>(56467-217452)  | 866752<br>(611231-1168817) | 602.1<br>(292.4 to 1383.3) | 90.72<br>(41.5-159.81)   | 245.8<br>(173.34-331.46) | 1.71<br>(0.51 to 4.72)    |
| Diet low in fruits                             | 71235<br>(23790-112519)   | 134380<br>(37082-211423)   | 88.6<br>(15.4 to 180.5)    | 52.35<br>(17.48-82.69)   | 38.11<br>(10.52-59.96)   | -0.27<br>(-0.55 to 0.08)  |
| High fasting plasma glucose                    | 88422<br>(17042-221322)   | 278294<br>(51642-686327)   | 214.7<br>(143.4 to 312)    | 64.98<br>(12.52-162.66)  | 78.92<br>(14.64-194.63)  | 0.21<br>(-0.06 to 0.59)   |
| Household air pollution from solid fuels       | 331155<br>(215263-470664) | 244149<br>(115569-425021)  | -26.3<br>(-61 to 24)       | 243.38<br>(158.2-345.91) | 69.24<br>(32.77-120.53)  | -0.72<br>(-0.85 to -0.52) |
| Occupational exposure to arsenic               | 8269<br>(2991-14033)      | 25632<br>(9155-44118)      | 210<br>(133.1 to 322.6)    | 6.08<br>(2.2-10.31)      | 7.27<br>(2.6-12.51)      | 0.2<br>(-0.1 to 0.63)     |
| Occupational exposure to asbestos              | 29838<br>(16235-53298)    | 80780<br>(40922-126625)    | 170.7<br>(22.6 to 385.9)   | 21.93<br>(11.93-39.17)   | 22.91<br>(11.61-35.91)   | 0.04<br>(-0.53 to 0.87)   |
| Occupational exposure to beryllium             | 355<br>(239-481)          | 1093<br>(738-1499)         | 208.2<br>(130.6 to 317.9)  | 0.26<br>(0.18-0.35)      | 0.31<br>(0.21-0.42)      | 0.19<br>(-0.11 to 0.61)   |
| Occupational exposure to cadmium               | 802<br>(553-1087)         | 2516<br>(1729-3515)        | 213.7<br>(132.8 to 332)    | 0.59<br>(0.41-0.8)       | 0.71<br>(0.49-1)         | 0.21<br>(-0.1 to 0.67)    |
| Occupational exposure to chromium              | 1482<br>(1122-1902)       | 4903<br>(3651-6512)        | 230.9<br>(145.6 to 348.6)  | 1.09<br>(0.82-1.4)       | 1.39<br>(1.04-1.85)      | 0.28<br>(-0.05 to 0.73)   |
| Occupational exposure to diesel engine exhaust | 13650<br>(10009-17704)    | 47894<br>(35253-63046)     | 250.9<br>(161.2 to 375.1)  | 10.03<br>(7.36-13.01)    | 13.58<br>(10-17.88)      | 0.35<br>(0.01 to 0.83)    |
| Occupational exposure to nickel                | 8713<br>(1903-19243)      | 25087<br>(4808-56305)      | 187.9<br>(115.8 to 289.6)  | 6.4<br>(1.4-14.14)       | 7.11<br>(1.36-15.97)     | 0.11<br>(-0.17 to 0.5)    |

|                                                           |                           |                             |                           |                          |                           |                         |
|-----------------------------------------------------------|---------------------------|-----------------------------|---------------------------|--------------------------|---------------------------|-------------------------|
| Occupational exposure to polycyclic aromatic hydrocarbons | 5115<br>(3594-6842)       | 16807<br>(11924-23126)      | 228.6<br>(145.8 to 353.1) | 3.76<br>(2.64-5.03)      | 4.77<br>(3.38-6.56)       | 0.27<br>(-0.05 to 0.75) |
| Occupational exposure to silica                           | 41574<br>(18930-65591)    | 110057<br>(45819-180259)    | 164.7<br>(97.1 to 256.6)  | 30.55<br>(13.91-48.21)   | 31.21<br>(12.99-51.12)    | 0.02<br>(-0.24 to 0.38) |
| Residential radon                                         | 50695<br>(9148-107729)    | 153562<br>(25780-325826)    | 202.9<br>(133.5 to 297.3) | 37.26<br>(6.72-79.17)    | 43.55<br>(7.31-92.4)      | 0.17<br>(-0.1 to 0.53)  |
| Secondhand smoke                                          | 166692<br>(96027-250025)  | 458641<br>(275227-696690)   | 175.1<br>(109.6 to 260.9) | 122.51<br>(70.57-183.75) | 130.07<br>(78.05-197.57)  | 0.06<br>(-0.19 to 0.39) |
| Smoking                                                   | 264340<br>(194150-346156) | 1029794<br>(813087-1296152) | 289.6<br>(175.3 to 455.9) | 194.27<br>(142.69-254.4) | 292.04<br>(230.58-367.57) | 0.5<br>(0.06 to 1.14)   |
| <b>Uterine cancer</b>                                     |                           |                             |                           |                          |                           |                         |
| High body-mass index                                      | 20354<br>(5453-43134)     | 54702<br>(24465-98887)      | 168.8<br>(76.6 to 442.3)  | 14.96<br>(4.01-31.7)     | 15.51<br>(6.94-28.04)     | 0.04<br>(-0.32 to 1.09) |

**Note:** Estimates are for populations aged 55 years and above among women in China. Rates are reported per 100000 person-years. Cancer types and risks are listed alphabetically. DALY=disability-adjusted life-year, UI=uncertainty interval.

**Figure S1** The changing trend of incidence rate (A) and the rank of incident cases (B) for 29 cancers in China from 1990 to 2019

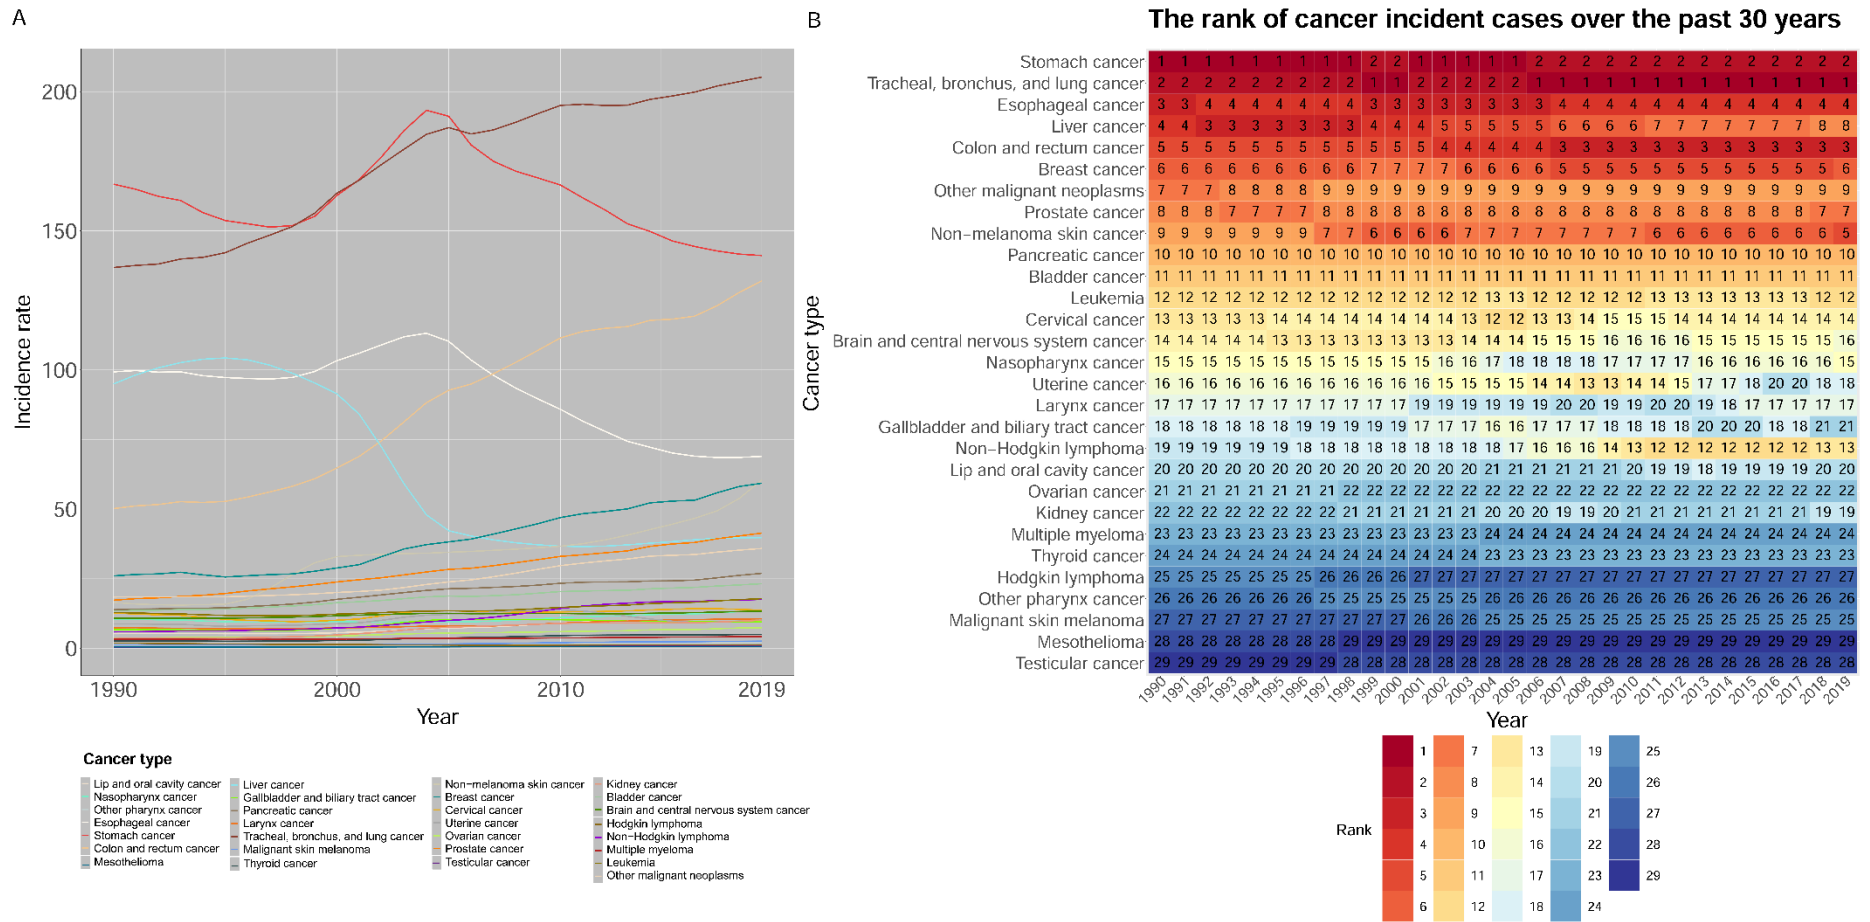

**Note:** Estimates are for populations aged 55 years and above, both sexes in China. Rates are reported per 100000 person-years.

**Figure S2** Incident cases, deaths and DALYs (A, B, C) of 29 cancers in 4 age groups (55–64 years, 65–74 years, 75–84 years, 85+ years) and the proportional incident cases, deaths, DALYs (D, E, F) in the four age groups in China in 2019

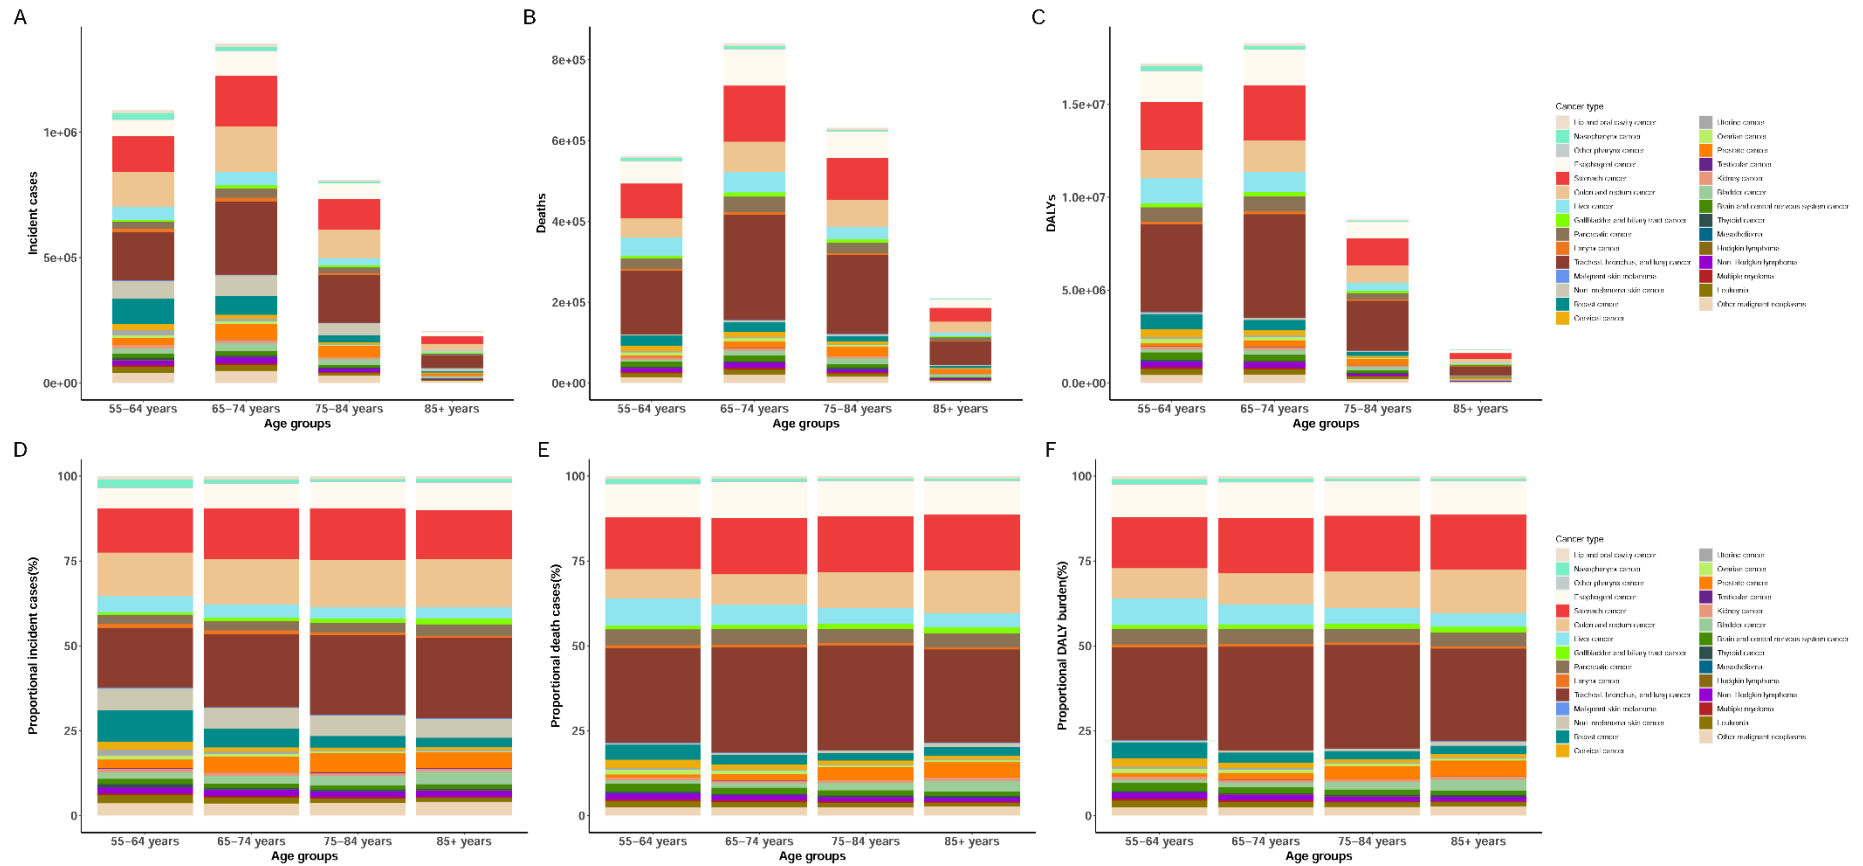

**Note:** Estimates are for populations aged 55 years and above, both sexes in China. DALY = disability-adjusted life-year.

**Figure S3** Incident cases, DALYs (A, B) and the proportional incident cases, DALYs (C, D) of 29 cancers among men and women in China in 2019

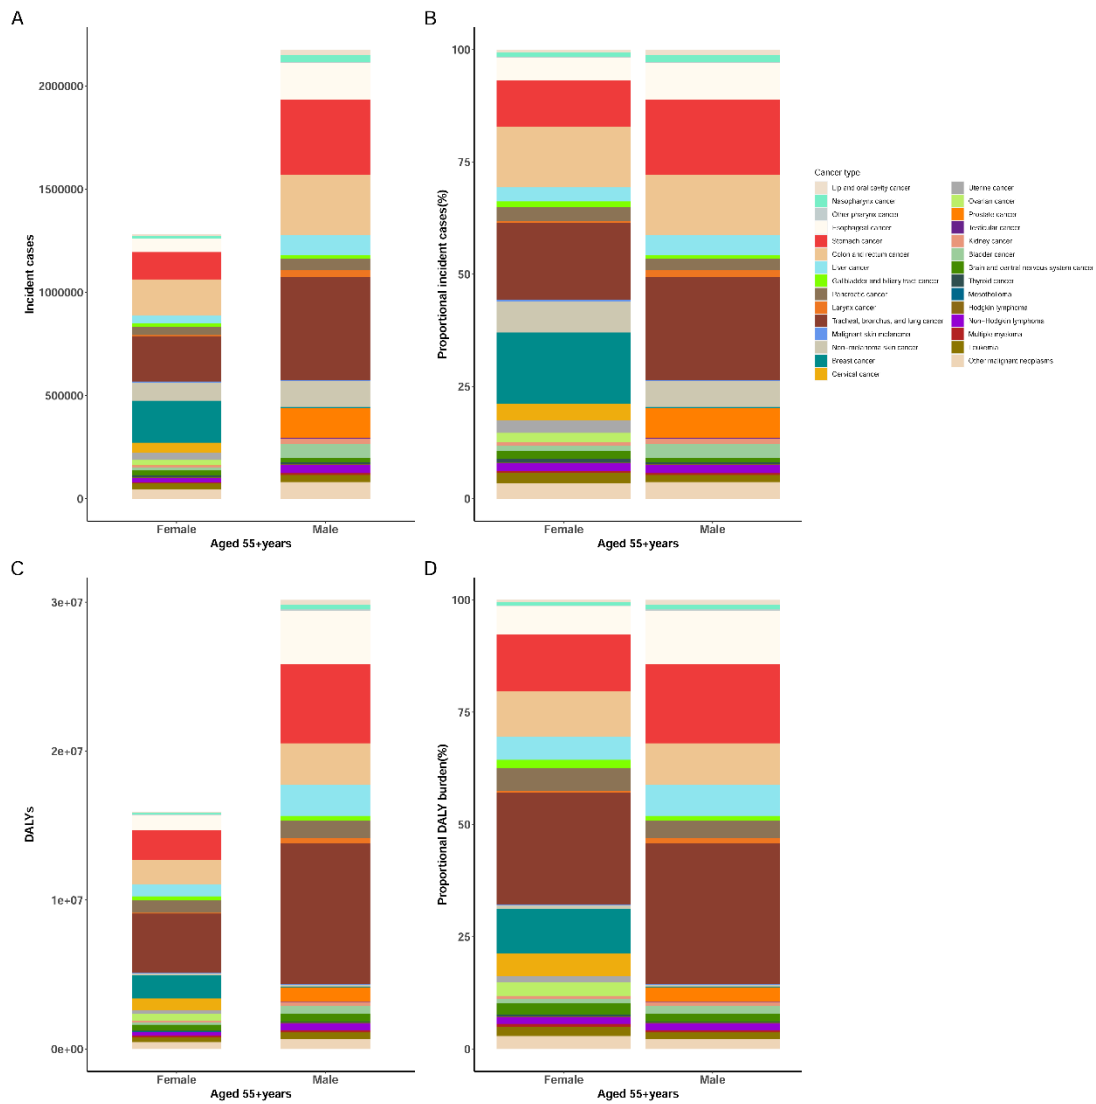

**Note:** Estimates are for populations aged 55 years and above among men and women in China. DALY=disability-adjusted life-year.

**Figure S4** Ratio of men to women incidence rate (A) and ratio of men to women DALY rate (B) of 24 cancers (the cancers can affect both men and women) in China from 1990 to 2019

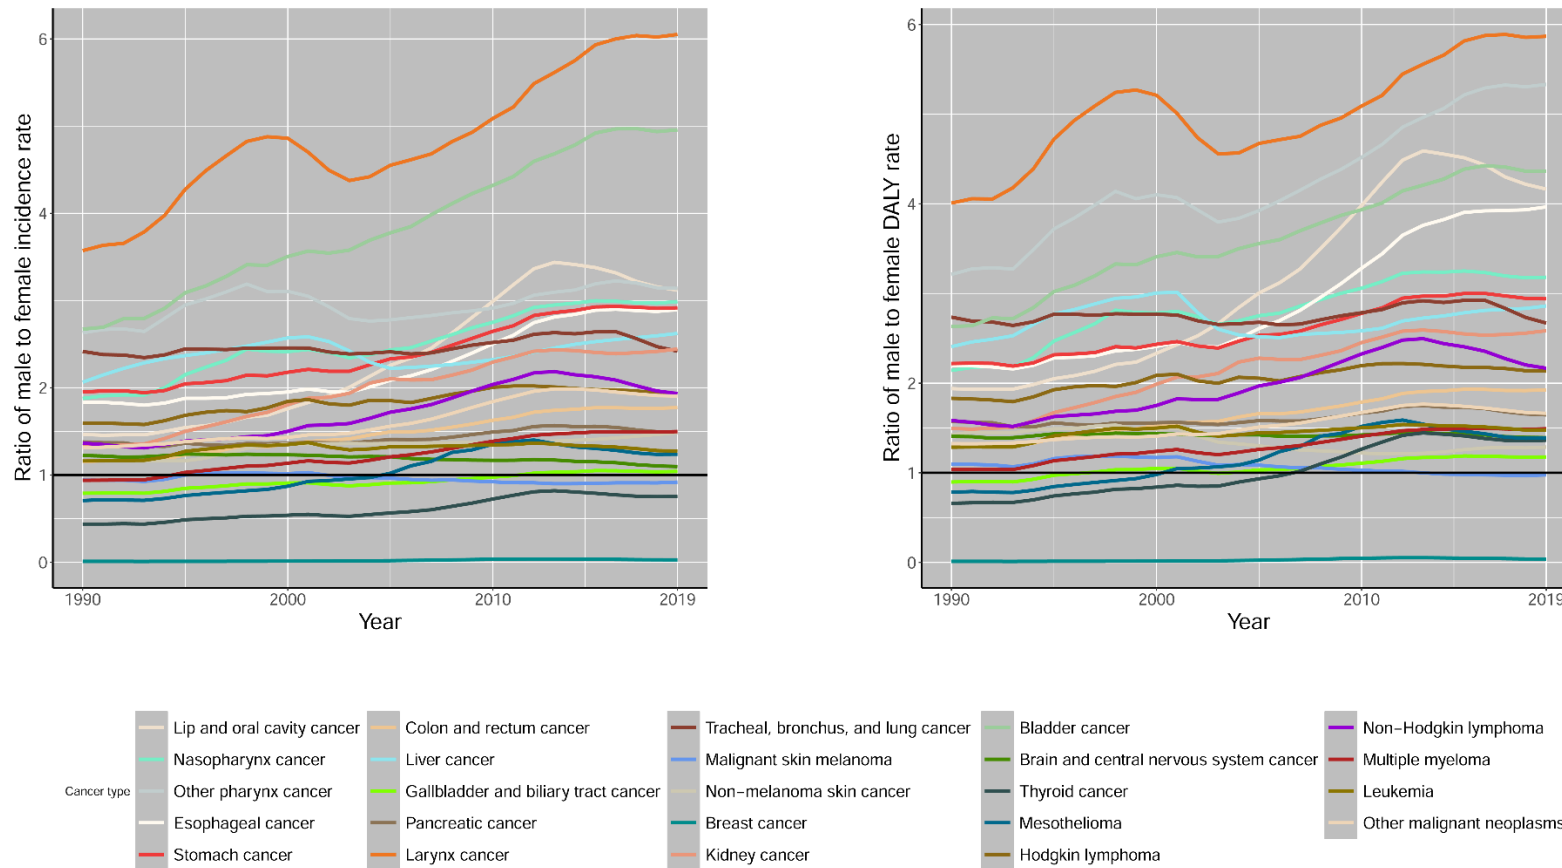

**Note:** Estimates are for populations aged 55 years and above. DALY=disability-adjusted life-year.

**Figure S5** Incident cases (A), death cases (C), DALYs (E) and the proportional incident cases (B), proportional deaths (D), proportional DALYs (F) of 29 cancers among China, United States, Western Europe in 2019

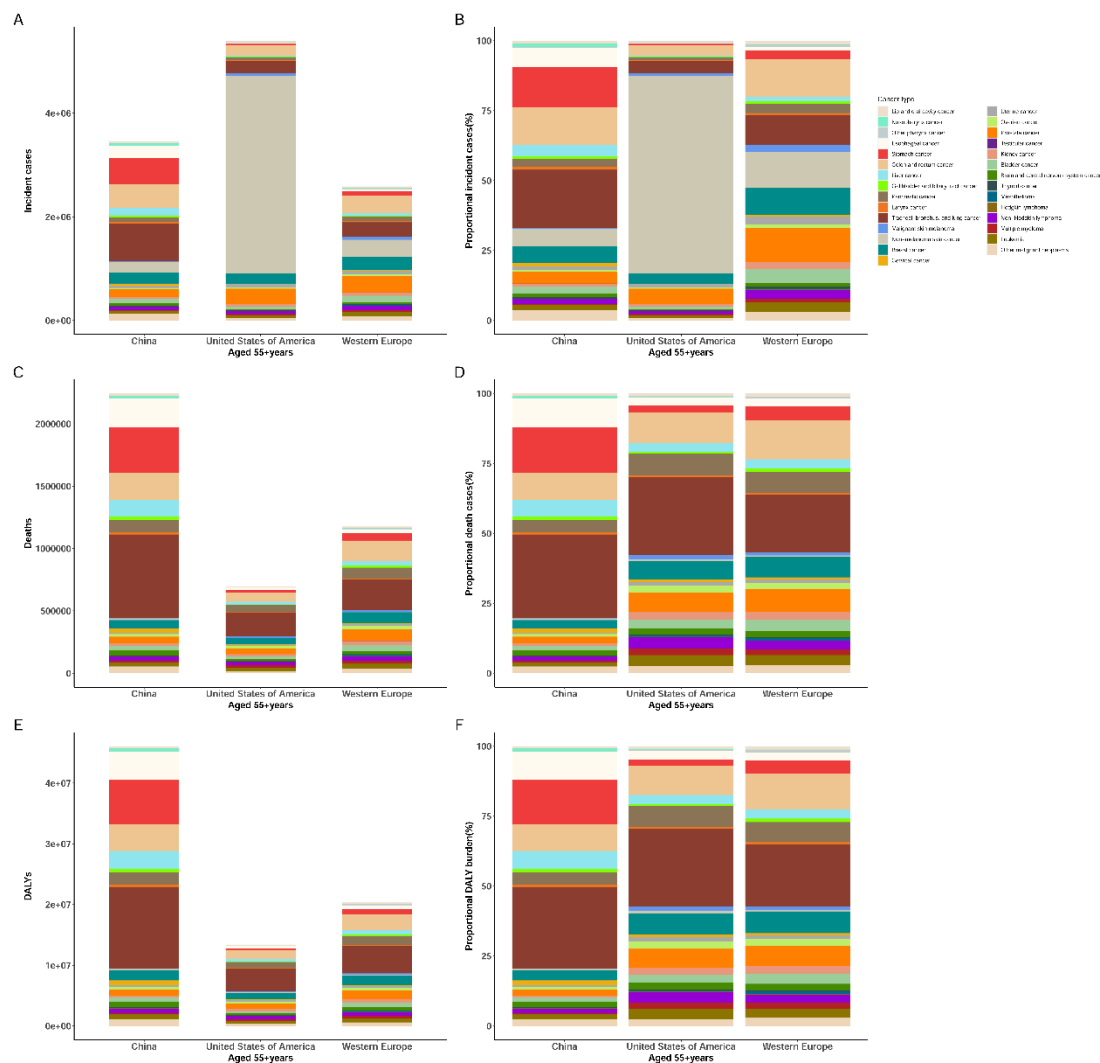

**Note:** Estimates are for populations aged 55 years and above. DALY=disability-adjusted life-year.

**Figure S6** The change trend of ASIR in 29 cancers among China, United States, Western Europe from 1990 to 2019

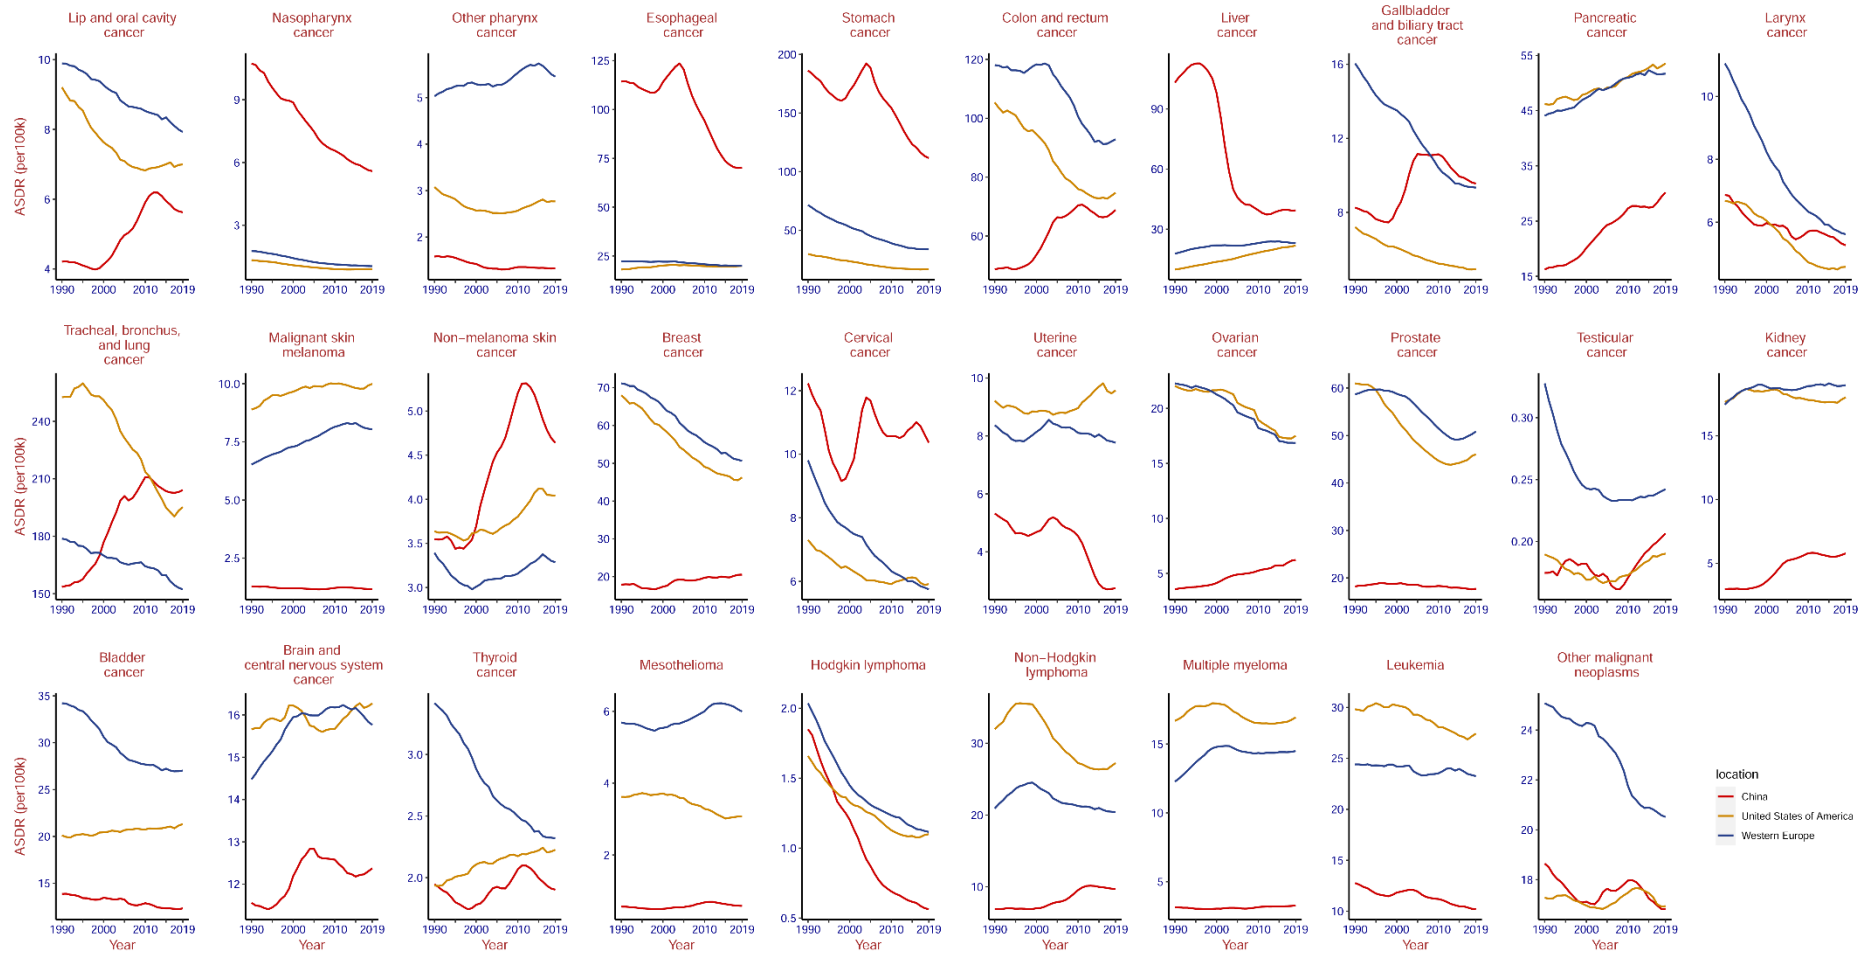

**Note:** Estimates are for populations aged 55 years and above. Rates are reported per 100000 person-years. ASIR=age-standardized incidence rate.



**Figure S7** The change trend of ASDR in 29 cancers among China, United States, Western Europe from 1990 to 2019

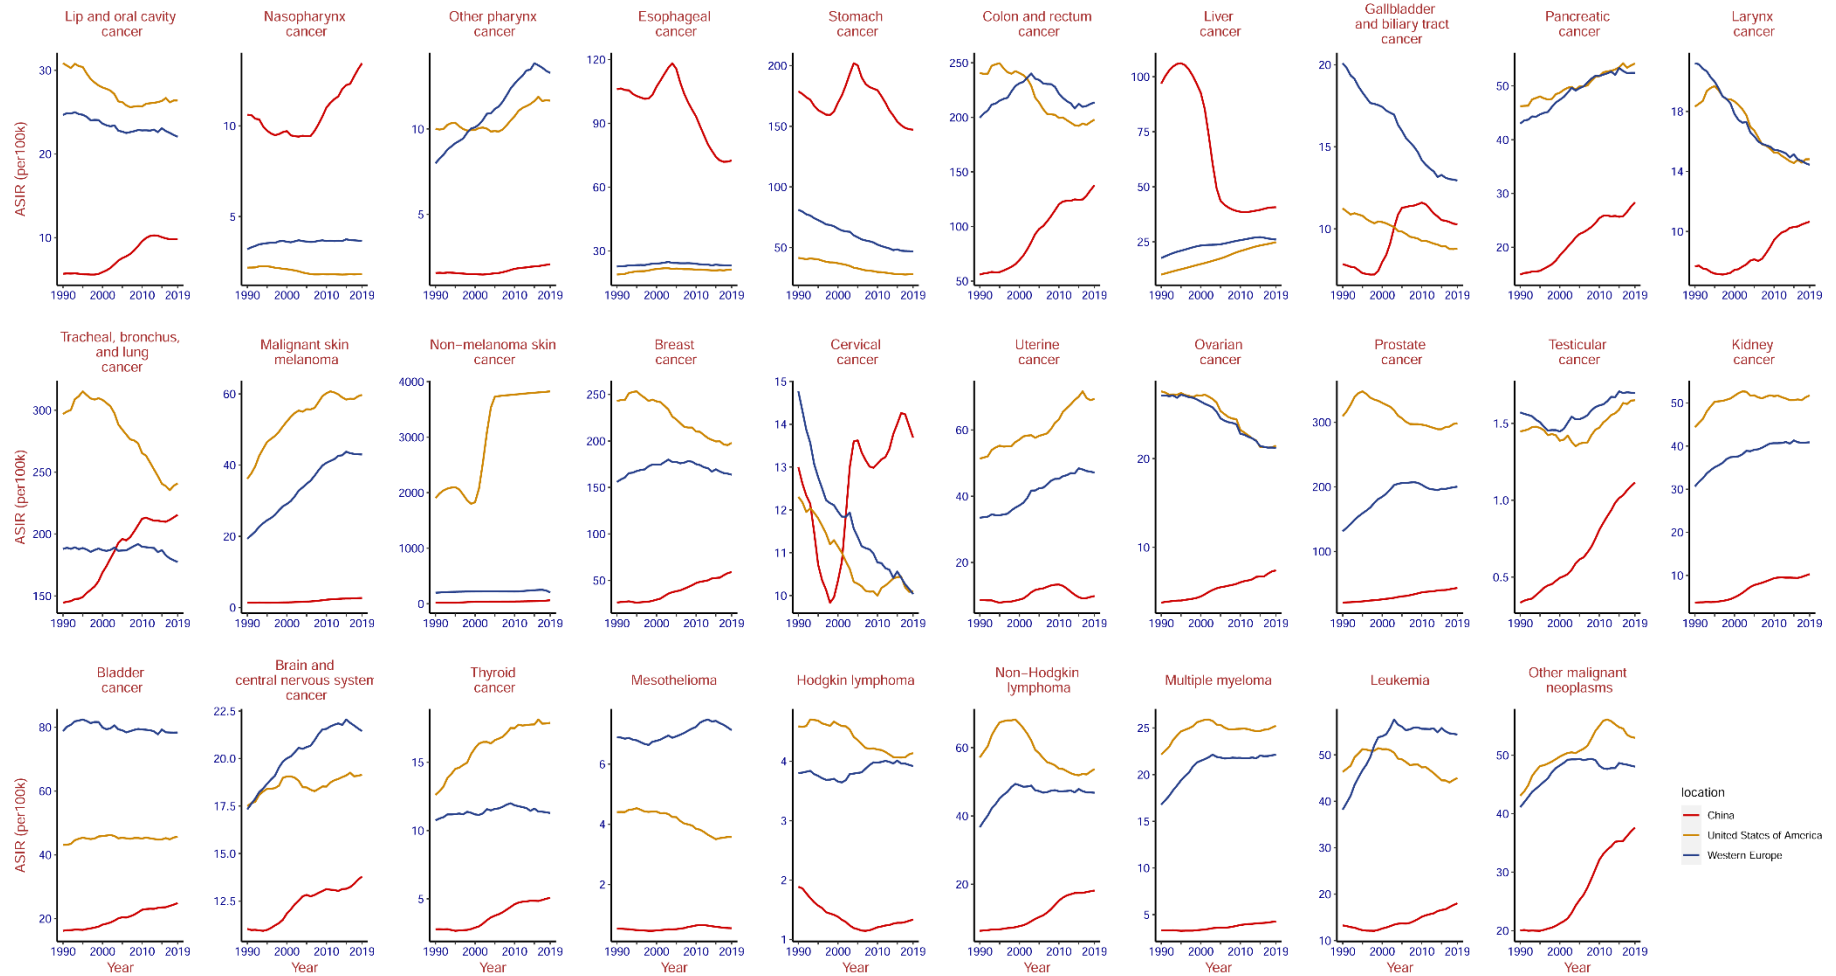

**Note:** Estimates are for populations aged 55 years and above. Rates are reported per 100000 person-years. ASDR=age-standardized death rate.
